# Supplementary material for: Provenance, modification and use of manganese-rich rocks at Le Moustier (Dordogne, France)
Source: PubMed Central journal article supplement (PMC6636720; doi:10.1371/journal.pone.0218568), 2019-07-17
Supplement: pone.0218568.s001.pdf [file pone.0218568.s001.pdf]

# Provenance, modification and use of manganese-rich rocks at Le Moustier (Dordogne, France)

Africa Pitarch Martí\*, Francesco d'Errico, Alain Turq, Eric Lebraud, Emmanuel Discamps, Brad Gravina

\*Corresponding Author:

E-mail: [africa.pitarch@gmail.com](mailto:africa.pitarch@gmail.com) (APM)

## S1 Tables

### **Supplementary data on the EDXRF calibration, the archaeological materials and the geological samples.**

Table A. Corrections used for the EDXRF calibration.

Table B. Elemental composition of certified reference materials and self-produced standards employed to calibrate the EDXRF spectrometer.

Table C. Calibrated elemental composition of the analysed standards.

Table D. Descriptive data on modified and unmodified Mn-rich black lumps from Le Moustier.

Table E. Elemental composition of archaeological Mn-rich black lumps from Le Moustier obtained by EDXRF.

Table F. Coefficient of variation of elements composing the Mn-rich black lumps from Le Moustier.

Table G. Results of SEM-EDS analyses of Mn-rich lumps from Le Moustier.

Table H. Processing techniques, degree of modification, facet morphology, and striations main orientation of Mn-rich black lumps from Le Moustier.

Table I. Results of EDXRF analysis of geological samples.

Table J. Results of SEM-EDS analyses of the geological samples.

**Table A. Corrections used for the EDXRF calibration**

| Calib.<br>Element | Overlap.<br>Elements<br>Corr. | Matrix<br>Elements<br>Corr. | R <sup>2</sup> | N. Stds used | Stds omitted<br>from calib. (*) |
|-------------------|-------------------------------|-----------------------------|----------------|--------------|---------------------------------|
| Si                | P, Sr                         | Si, Ca, Mn, Fe              | 1.00           | 12           | -                               |
| K                 | Ca                            | Mn                          | 1.00           | 11           | STD-05                          |
| Ca                | -                             | -                           | 1.00           | 11           | NCS DC 11020<br>NCS DC          |
| Ti                | Ba                            | Mn                          | 0.98           | 7            | 28043; STD-01                   |
| Mn                | Fe                            | Si, Ca, Mn, Fe              | 0.99           | 11           | STD-03                          |
| Fe                | Mn, Co                        | Si, Ca, Mn, Fe              | 1.00           | 11           | NCS DC 11023                    |
| Ni                | Co, Cu, W                     | Si, Ca, Mn, Fe              | 0.99           | 11           | -<br>NCS DC                     |
| Zn                | Cu                            | -                           | 0.98           | 9            | 28043; NCS<br>DC 11020          |
| As                | Pb                            | Si, Ca, Mn                  | 1.00           | 9            | STD-05                          |
| Sr                | -                             | -                           | 1.00           | 6            | STD-07                          |
| Ba                | -                             | Si, Ca, Mn, Fe              | 0.99           | 11           | STD-06                          |
| Pb                | As                            |                             | 1.00           | 9            | STD-04                          |

Calib.: calibration; Overlap.: overlapping; Corr. correction; Stds: standards.

**Table B. Elemental composition of certified reference materials and self-produced standards employed to calibrate the EDXRF spectrometer**

| Reference    | Si    |      | K     |      | Ca    |      | Ti    |       | Mn    |      | Fe    |      | Ni    |       | Zn    |       | As    |        | Sr    |        | Pb    |        | Ba    |        |
|--------------|-------|------|-------|------|-------|------|-------|-------|-------|------|-------|------|-------|-------|-------|-------|-------|--------|-------|--------|-------|--------|-------|--------|
|              | Conc. | Unc. | Conc. | Unc. | Conc. | Unc. | Conc. | Unc.  | Conc. | Unc. | Conc. | Unc. | Conc. | Unc.  | Conc. | Unc.  | Conc. | Unc.   | Conc. | Unc.   | Conc. | Unc.   | Conc. | Unc.   |
| NCS DC 11023 | 6.1   | 0.02 | 0.33  | 0.00 | 1.67  | 0.01 | 0.086 | 0.001 | 35.54 | 0.1  | 10.3  | 0.1  | 0.023 | 0.002 | 0.066 | 0.003 | 0.112 | 0.003  | -     | -      | 0.058 | 0.003  | 1.45  | 0.04   |
| NCS DC 11020 | 13.1  | 0.05 | 0.92  | 0.01 | 1.69  | 0.03 | 0.162 | 0.002 | 22.31 | 0.1  | 9.7   | 0.0  | 0.089 | 0.003 | 0.170 | 0.01  | 0.034 | 0.001  | -     | -      | 0.120 | 0.003  | 0.48  | 0.01   |
| NCS DC 28041 | 26.2  | 0.04 | 3.1   | 0.04 | 1.48  | 0.02 | 0.106 | 0.003 | 14.45 | 0.1  | 0.85  | 0.01 | -     | -     | 0.015 | 0.002 | 0.013 | 0.002  | -     | -      | 0.003 | 0.0004 | 0.06  | 0.003  |
| NCS DC 28043 | 8.1   | 0.03 | 0.54  | 0.02 | 0.82  | 0.01 | 0.129 | 0.003 | 30.99 | 0.1  | 10.7  | 0.1  | 0.083 | 0.002 | 0.235 | 0.01  | 0.089 | 0.002  | -     | -      | 0.110 | 0.005  | 0.99  | 0.01   |
| NCS DC 47004 | 7.6   | 0.04 | 0.83  | 0.02 | 0.76  | 0.02 | 0.038 | 0.002 | 45.39 | 0.1  | 1.22  | 0.02 | 0.019 | 0.001 | 0.027 | 0.002 | -     | -      | -     | -      | -     | -      | 0.61  | 0.04   |
| STD-01       | 3.6   | 0.18 | 0.14  | 0.01 | 12.6  | 0.3  | 0.029 | 0.007 | 35.5  | 0.4  | 1.17  | 0.02 | 0.055 | 0.003 | 0.185 | 0.02  | 0.028 | 0.001  | 0.014 | 0.001  | 0.001 | 0.0001 | 2.89  | 0.1    |
| STD-02       | 20.5  | 0.21 | 0.84  | 0.04 | 6.6   | 0.1  | 0.126 | 0.013 | 13.7  | 0.1  | 1.16  | 0.02 | 0.013 | 0.001 | 0.474 | 0.047 | 0.003 | 0.0003 | 0.008 | 0.0004 | 0.001 | 0.0001 | 0.06  | 0.0028 |
| STD-03       | 2.99  | 0.15 | 0.20  | 0.02 | 5.9   | 0.1  | 0.016 | 0.004 | 47.6  | 0.5  | 0.14  | 0.01 | 0.014 | 0.001 | <LOD  | -     | 0.001 | 0.0001 | 0.004 | 0.0002 | 0.000 | 0.0000 | 0.92  | 0.05   |
| STD-04       | 7.7   | 0.08 | 1.46  | 0.07 | 1.37  | 0.1  | 0.113 | 0.011 | 41.6  | 0.4  | 2.55  | 0.1  | 0.021 | 0.001 | 0.051 | 0.005 | 0.035 | 0.002  | 0.487 | 0.024  | 0.011 | 0.001  | 2.63  | 0.1    |
| STD-05       | 0.47  | 0.02 | 0.06  | 0.01 | 0.39  | 0.02 | <LOD  | -     | 62.4  | 0.6  | 0.08  | 0.00 | 0.023 | 0.001 | 0.034 | 0.003 | 0.081 | 0.004  | 0.033 | 0.002  | 0.000 | 0.0000 | 0.27  | 0.01   |
| STD-06       | 0.80  | 0.04 | 0.06  | 0.01 | 27.6  | 0.6  | <LOD  | -     | 14.7  | 0.1  | 0.27  | 0.01 | 0.016 | 0.001 | 0.044 | 0.004 | 0.004 | 0.0004 | 0.008 | 0.0004 | 0.001 | 0.0001 | 3.11  | 0.2    |
| STD-07       | 2.57  | 0.13 | 0.09  | 0.01 | 31.2  | 0.6  | <LOD  | -     | 8.2   | 0.1  | 0.78  | 0.02 | 0.015 | 0.001 | 0.007 | 0.001 | 0.007 | 0.0003 | 0.017 | 0.001  | 0.001 | 0.0001 | 1.42  | 0.1    |

Values expressed in percentages. NCS DC: certified reference material; STD: self-produced standard. Conc.: concentration; Unc.: uncertainty.

**Table C. Calibrated elemental composition of the analysed standards**

| Reference    | Si    |      | K     |       | Ca    |       | Ti    |       | Mn    |     | Fe    |      | Ni    |       | Zn    |       | As    |        | Sr    |        | Pb    |       | Ba    |       |
|--------------|-------|------|-------|-------|-------|-------|-------|-------|-------|-----|-------|------|-------|-------|-------|-------|-------|--------|-------|--------|-------|-------|-------|-------|
|              | Conc. | Std  | Conc. | Std   | Conc. | Std   | Conc. | Std   | Conc. | Std | Conc. | Std  | Conc. | Std   | Conc. | Std   | Conc. | Std    | Conc. | Std    | Conc. | Std   | Conc. | Std   |
| NCS DC 11023 | 6.5   | 0.4  | 0.37  | 0.01  | 1.97  | 0.005 | 0.091 | 0.005 | 34.4  | 0.7 | 9.7   | 0.1  | 0.021 | 0.001 | 0.058 | 0.001 | 0.112 | 0.003  | 0.099 | 0.001  | 0.044 | 0.003 | 1.44  | 0.02  |
| NCS DC 11020 | 13.7  | 0.1  | 0.99  | 0.01  | 1.53  | 0.03  | 0.155 | 0.004 | 22.5  | 0.2 | 9.4   | 0.1  | 0.088 | 0.001 | 0.139 | 0.002 | 0.034 | 0.001  | 0.070 | 0.002  | 0.120 | 0.002 | 0.47  | 0.02  |
| NCS DC 28041 | 25.8  | 0.4  | 2.94  | 0.04  | 1.23  | 0.05  | 0.111 | 0.003 | 14.7  | 0.1 | 0.9   | 0.01 | <LOD  | -     | 0.033 | 0.005 | 0.013 | 0.0004 | 0.686 | 0.003  | 0.003 | 0.001 | 0.062 | 0.013 |
| NCS DC 28043 | 7.9   | 0.3  | 0.59  | 0.01  | 0.86  | 0.03  | 0.110 | 0.008 | 31.6  | 0.5 | 10.7  | 0.1  | 0.085 | 0.002 | 0.170 | 0.003 | 0.093 | 0.003  | 0.098 | 0.002  | 0.103 | 0.003 | 1.02  | 0.06  |
| NCS DC 47004 | 7.8   | 0.6  | 0.84  | 0.01  | 0.85  | 0.01  | 0.024 | 0.005 | 45.4  | 1.3 | 1.13  | 0.02 | 0.019 | 0.001 | 0.039 | 0.001 | 0.010 | 0.001  | 0.156 | 0.002  | 0.004 | 0.001 | 0.65  | 0.03  |
| STD-01       | 4.8   | 1.0  | 0.11  | 0.01  | 10.2  | 0.1   | 0.146 | 0.059 | 36.7  | 0.4 | 0.78  | 0.01 | 0.054 | 0.001 | 0.132 | 0.001 | 0.030 | 0.001  | 0.017 | 0.001  | <LOD  | -     | 2.61  | 0.35  |
| STD-02       | 19.9  | 0.7  | 0.85  | 0.03  | 7.1   | 0.02  | 0.125 | 0.001 | 20.0  | 0.3 | 1.09  | 0.04 | 0.016 | 0.001 | 0.507 | 0.003 | 0.003 | 0.001  | 0.015 | 0.002  | 0.004 | 0.001 | 0.050 | 0.004 |
| STD-03       | 3.3   | 0.7  | 0.17  | 0.01  | 6.7   | 0.03  | 0.021 | 0.001 | 50.3  | 0.9 | 0.22  | 0.01 | 0.013 | 0.001 | 0.022 | 0.001 | 0.001 | 0.0001 | 0.001 | 0.0005 | 0.003 | 0.001 | 1.07  | 0.11  |
| STD-04       | <LOD  | -    | 0.06  | 0.01  | 0.51  | 0.01  | 0.050 | 0.004 | 61.5  | 0.5 | 0.08  | 0.02 | 0.026 | 0.002 | 0.042 | 0.001 | 0.081 | 0.001  | 0.028 | 0.002  | 0.015 | 0.002 | 0.32  | 0.043 |
| STD-05       | 8.1   | 0.8  | 1.09  | 0.03  | 1.38  | 0.01  | 0.105 | 0.007 | 37.9  | 0.7 | 2.82  | 0.02 | 0.025 | 0.001 | 0.049 | 0.001 | 0.074 | 0.003  | 0.486 | 0.001  | 0.011 | 0.001 | 2.57  | 0.06  |
| STD-06       | 2.84  | 0.24 | 0.02  | 0.004 | 27.3  | 0.1   | 0.140 | 0.009 | 13.7  | 0.1 | 0.24  | 0.04 | 0.016 | 0.001 | 0.033 | 0.003 | 0.002 | 0.0004 | 0.010 | 0.001  | 0.001 | 0.001 | 2.52  | 0.03  |
| STD-07       | 3.5   | 0.8  | 0.15  | 0.02  | 31.8  | 0.1   | 0.053 | 0.008 | 7.6   | 0.1 | 0.86  | 0.01 | 0.017 | 0.000 | 0.020 | 0.001 | 0.006 | 0.0003 | 0.070 | 0.002  | <LOD  | -     | 1.41  | 0.03  |

Values expressed as percentage. Element contents were calculated as the average of five acquisitions. NCS DC: certified reference material; STD: self-produced standard.

**Table D. Descriptive data on modified and unmodified Mn-rich black lumps from Le Moustier**

| Piece           | Length (mm) | Width (mm) | Thickness (mm) | Weight (g) | Density   | Hardness | Type of lump / fragment | Morphology                   | Hue            | Appearance                                           | Rock structure                         | Anthrop. Mod. |
|-----------------|-------------|------------|----------------|------------|-----------|----------|-------------------------|------------------------------|----------------|------------------------------------------------------|----------------------------------------|---------------|
| MOU-MNP-01      | 55.50       | 38.00      | 38.30          | 110.30     | Very high | Hard     | Nodule                  | Square base pseudo-pyramidal | Black          | Irregular dull surface                               | Massive, porous                        | Yes           |
| MOU-MNP-02      | 48.50       | 33.00      | 18.40          | 36.50      | High      | Hard     | NA                      | Prismatic                    | Anthracite     | Irregular dull surface                               | Massive                                | Yes           |
| MOU-MNP-03      | 37.80       | 26.90      | 21.10          | 34.90      | Very high | Hard     | Nodule                  | Irregular                    | Anthracite     | Irregular dull surface                               | Massive                                | Yes           |
| MOU-MNP-04      | 35.90       | 26.00      | 14.40          | 15.60      | Medium    | Hard     | Nodule                  | Irregular                    | Anthracite     | Irregular surface with a metallic sheen              | Massive                                | Yes           |
| MOU-MNP-05      | 32.80       | 22.70      | 15.20          | 11.40      | Medium    | Hard     | Crust                   | Irregular                    | Black          | Irregular dull surface                               | Granular, porous                       | Yes           |
| MOU-MNP-06      | 27.90       | 20.90      | 16.50          | 3.10       | Very low  | Soft     | NA                      | Irregular                    | Brownish black | Irregular dull surface                               | Massive                                | Possible      |
| MOU-MNP-07      | 35.70       | 28.70      | 22.70          | 11.90      | Medium    | Hard     | Crust                   | Pseudo-pyramidal             | Very dark grey | Irregular dull surface                               | Massive, porous                        | Yes           |
| MOU-MNP-08      | 58.10       | 45.20      | 26.00          | 56.20      | Medium    | Hard     | Crust                   | Irregular                    | Very dark grey | Botryoidal dull surface                              | Massive, porous                        | Yes           |
| MOU-MNP-09      | 46.70       | 44.60      | 27.90          | 47.00      | High      | Hard     | Crust                   | Irregular                    | Very dark grey | Botryoidal surface with a metallic sheen             | Massive, porous                        | No            |
| MOU-MNP-10      | 43.50       | 28.10      | 19.60          | 24.90      | High      | Hard     | Crust                   | Irregular                    | Anthracite     | Botryoidal dull surface                              | Massive                                | Yes           |
| MOU-MNP-11      | 34.70       | 26.40      | 13.80          | 13.20      | Medium    | Hard     | Crust ?                 | Irregular                    | Very dark grey | Ribbed dull surface                                  | Columnar                               | No            |
| MOU-MNP-12      | 36.50       | 34.50      | 17.30          | 20.60      | High      | Hard     | Crust                   | Irregular                    | Anthracite     | Irregular dull surface, occasionally botryoidal      | Massive, slightly porous               | Yes           |
| MOU-MNP-13      | 29.90       | 26.30      | 14.90          | 16.40      | High      | Hard     | Crust                   | Irregular                    | Anthracite     | Irregular dull surface                               | Massive, slightly porous               | Yes           |
| MOU-MNP-14      | 20.40       | 17.40      | 11.70          | 4.60       | Low       | Hard     | Crust                   | Irregular                    | Anthracite     | Irregular dull surface, with local metallic sheen    | Massive, porous                        | No            |
| MOU-MNP-15      | 25.40       | 13.30      | 10.30          | 4.60       | Medium    | Hard     | NA                      | Pyramidal                    | Very dark grey | Irregular dull surface, with local metallic sheen    | Massive                                | Yes           |
| MOU-MNP-16      | 16.80       | 13.80      | 12.20          | 2.90       | Low       | Hard     | NA                      | Irregular                    | Very dark grey | Irregular dull surface, occasionally glossy          | Massive, slightly porous               | Yes           |
| MOU-MNP-17      | 17.10       | 15.80      | 12.40          | 3.00       | Very low  | Hard     | NA                      | Irregular                    | Very dark grey | Irregular dull surface, with local metallic sheen    | Massive, slightly porous               | Possible      |
| MOU-MNP-18      | 16.50       | 11.20      | 8.60           | 1.30       | Very low  | Hard     | NA                      | Irregular                    | Very dark grey | Irregular dull surface, with local metallic sheen    | Massive, slightly porous               | No            |
| MOU-MNP-19      | 26.03       | 19.37      | 17.93          | 13.50      | Medium    | Hard     | NA                      | Irregular                    | Very dark grey | Irregular glossy surface                             | Massive, porous                        | Yes           |
| MOU-MNP-20      | 15.27       | 13.73      | 7.28           | 1.30       | Very low  | Hard     | NA                      | Irregular                    | Very dark grey | Irregular glossy surface                             | Massive                                | Possible      |
| MOU-MNP-L&R-H7  | 23.21       | 19.32      | 10.74          | 5.82       | Medium    | Hard     | NA                      | Pyramidal                    | Very dark grey | Irregular dull surface                               | Massive                                | Yes           |
| MOU-MNP-L&R-H8  | 12.20       | 11.52      | 7.61           | 1.81       | Medium    | Hard     | NA                      | Pyramidal                    | Very dark grey | NA                                                   | Massive                                | Yes           |
| MOU-G&D-5983    | 6.88        | 4.19       | 3.48           | 0.18       | Low       | Soft     | NA                      | NA                           | Dark grey      | Irregular dull surface                               | Massive                                | No            |
| MOU-G&D-6846-a  | 12.81       | 8.30       | 5.20           | 0.77       | Low       | Soft     | NA                      | Pyramidal                    | Very dark grey | Irregular dull surface                               | Massive, slightly porous               | Yes           |
| MOU-G&D-6846-b  | 9.73        | 5.82       | 3.56           | 0.38       | Low       | Soft     | NA                      | Irregular                    | Very dark grey | Irregular dull surface                               | Massive, slightly porous               | Yes           |
| MOU-G&D-6846-c  | 7.02        | 6.50       | 4.16           | 0.27       | Low       | Soft     | NA                      | Irregular                    | Very dark grey | Irregular dull surface                               | Massive, slightly porous               | Yes           |
| MOU-G&D-6857    | 27.26       | 15.70      | 12.30          | 7.79       | Medium    | Medium   | NA                      | Pyramidal                    | Very dark grey | NA                                                   | Massive, slightly porous               | Yes           |
| MOU-G&D-7527-a  | 15.15       | 10.31      | 7.29           | 1.83       | Low       | Hard     | NA                      | Pyramidal                    | Very dark grey | Irregular dull surface                               | Massive, slightly porous               | Yes           |
| MOU-G&D-7527-b  | 9.11        | 8.31       | 9.51           | 1.04       | Low       | Hard     | NA                      | Irregular                    | Very dark grey | Irregular dull surface                               | Massive, slightly porous               | Yes           |
| MOU-G&D-4584-a1 | 13.08       | 7.89       | 5.25           | 0.76       | Low       | Hard     | NA                      | Irregular                    | Very dark grey | Irregular dull surface                               | Massive, slightly porous               | No            |
| MOU-G&D-4584-a2 | 7.97        | 7.45       | 4.64           | 0.06       | Low       | Hard     | NA                      | Irregular                    | Very dark grey | Irregular dull surface                               | Massive, slightly porous               | No            |
| MOU-G&D-4584-a3 | 7.29        | 6.02       | 3.78           | 0.19       | Low       | Hard     | NA                      | Irregular                    | Very dark grey | Irregular dull surface                               | Massive, slightly porous               | Possible      |
| MOU-G&D-4584-a4 | 7.54        | 4.16       | 3.18           | 0.36       | Low       | Hard     | NA                      | Irregular                    | Very dark grey | Irregular dull surface                               | Massive, slightly porous               | Possible      |
| MOU-G&D-4584-a5 | 7.10        | 4.85       | 2.55           | 0.12       | Low       | Hard     | NA                      | Irregular                    | Very dark grey | Irregular dull surface                               | Massive, slightly porous               | Possible      |
| MOU-G&D-4584-a6 | 6.79        | 5.37       | 4.49           | 0.15       | Low       | Hard     | NA                      | Irregular                    | Very dark grey | Irregular dull surface                               | Massive, slightly porous               | Possible      |
| MOU-G&D-5255-a1 | 11.23       | 10.09      | 6.59           | 0.92       | Low       | Hard     | NA                      | Irregular                    | Very dark grey | Irregular dull surface                               | Massive                                | No            |
| MOU-G&D-5255-a2 | 7.20        | 5.79       | 3.03           | 0.17       | Low       | Hard     | NA                      | Irregular                    | Very dark grey | Irregular dull surface                               | Massive                                | No            |
| MOU-G&D-5902-a2 | 13.49       | 8.64       | 4.54           | 0.98       | Low       | Medium   | NA                      | Irregular                    | Very dark grey | Irregular dull surface                               | Massive                                | No            |
| MOU-G&D-5902-a3 | 12.50       | 7.39       | 5.61           | 0.92       | Low       | Hard     | NA                      | Irregular                    | Very dark grey | Irregular dull surface, with local blueish reflexion | Massive                                | No            |
| MOU-G&D-5902-a4 | 9.75        | 7.35       | 6.56           | 0.62       | Low       | Hard     | NA                      | Irregular                    | Very dark grey | Irregular dull surface                               | Massive                                | No            |
| MOU-G&D-5902-a5 | 8.67        | 7.26       | 3.23           | 0.11       | Low       | Hard     | NA                      | Irregular                    | Very dark grey | Irregular dull surface                               | Massive                                | No            |
| MOU-G&D-9796    | 26.13       | 14.12      | 15.11          | 4.28       | Low       | Hard     | NA                      | Irregular                    | Very dark grey | Irregular dull surface                               | Massive                                | Yes           |
| MOU-G&D-11571   | 14.77       | 13.11      | 9.64           | 3.76       | Medium    | Hard     | NA                      | Irregular                    | Very dark grey | Irregular dull surface                               | Massive                                | Yes           |
| MOU-G&D-8975    | 12.58       | 11.21      | 5.57           | 0.71       | Low       | Hard     | NA                      | Irregular                    | Very dark grey | Irregular dull surface, with local metallic sheen    | Slightly laminated; with some crystals | Yes           |
| MOU-G&D-9858-a  | 10.47       | 9.33       | 6.99           | 1.12       | Low       | Hard     | NA                      | Irregular                    | Very dark grey | Irregular glossy surface                             | Massive                                | Yes           |
| MOU-G&D-9858-b  | 16.88       | 12.49      | 9.79           | 2.17       | Very low  | Hard     | NA                      | Irregular                    | Dark grey      | Botryoidal dull surface                              | Massive                                | No            |
| MOU-G&D-9858-c  | 12.58       | 5.69       | 2.98           | 0.17       | Low       | Hard     | NA                      | Irregular                    | Dark grey      | Botryoidal dull surface                              | Massive                                | No            |
| MOU-G&D-9858-d  | 7.17        | 5.72       | 2.98           | 0.09       | Low       | Hard     | NA                      | Irregular                    | Dark grey      | Botryoidal dull surface                              | Massive                                | No            |
| MOU-G&D-11869   | 16.67       | 8.42       | 9.08           | 2.38       | High      | Hard     | NA                      | Pseudo-ellipsoidal           | Very dark grey | Irregular dull surface                               | Massive                                | Yes           |

| Piece           | Length (mm) | Width (mm) | Thickness (mm) | Weight (g) | Density  | Hardness | Type of lump / fragment | Morphology | Hue            | Appearance             | Rock structure           | Anthrop. Mod. |
|-----------------|-------------|------------|----------------|------------|----------|----------|-------------------------|------------|----------------|------------------------|--------------------------|---------------|
| MOU-G&D-11236-a | 8.68        | 6.58       | 6.36           | 0.58       | Low      | Hard     | NA                      | Irregular  | Very dark grey | Irregular dull surface | Massive, slightly porous | No            |
| MOU-G&D-11236-b | 14.67       | 7.67       | 5.04           | 0.45       | Very low | Hard     | NA                      | Irregular  | Very dark grey | Irregular dull surface | Massive                  | Yes           |
| MOU-G&D-12575-a | 11.57       | 9.18       | 8.46           | 1.16       | Medium   | Hard     | NA                      | Irregular  | Very dark grey | Irregular dull surface | Massive                  | Yes           |
| MOU-G&D-12575-b | 8.46        | 6.63       | 4.15           | 0.24       | Low      | Hard     | NA                      | Irregular  | Very dark grey | Irregular dull surface | Massive                  | No            |
| MOU-G&D-13440   | 8.66        | 8.10       | 3.39           | 0.20       | Low      | Hard     | Crust                   | Cubic      | Very dark grey | Irregular dull surface | Massive                  | No            |

Anthrop.Mod.: Anthropogenic modifications

**Table E. Elemental composition of archaeological Mn-rich black lumps from Le Moustier obtained by EDXRF**

| Piece            | Si   | K    | Ca  | Ti     | Mn   | Fe    | Ni   | Zn   | As  | Sr   | Ba    | Pb  |
|------------------|------|------|-----|--------|------|-------|------|------|-----|------|-------|-----|
| MOU-MNP-01_01    | 6.1  | 0.25 | 1.2 | 0.912  | 36.4 | 0.004 | 5    | 341  | 385 | 1169 | 57440 | 10  |
| MOU-MNP-01_02    | 5.4  | 0.25 | 2.2 | 0.927  | 33.4 | 0.004 | 6    | 322  | 352 | 1128 | 55340 | 9   |
| MOU-MNP-01_03    | 3.0  | 0.22 | 1.6 | 1.049  | 33.5 | 0.004 | 4    | 294  | 272 | 717  | 52040 | 9   |
| MOU-MNP-01_04    | 4.7  | 0.19 | 1.3 | 0.973  | 35.7 | 0.004 | 4    | 292  | 309 | 974  | 55990 | 9   |
| MOU-MNP-02_01    | 2.4  | 0.19 | 2.5 | 0.076  | 50.0 | 0.006 | 265  | 865  | 149 | 284  | 35420 | 85  |
| MOU-MNP-02_02    | 8.7  | 0.29 | 6.1 | 0.220  | 36.3 | 0.04  | 207  | 1938 | 101 | 353  | 30720 | 50  |
| MOU-MNP-02_03    | 8.1  | 0.34 | 7.3 | 0.223  | 35.1 | 0.005 | 204  | 547  | 143 | 340  | 28030 | 11  |
| MOU-MNP-02_04    | 5.6  | 0.25 | 2.5 | 0.318  | 41.0 | 0.18  | 261  | 3165 | 106 | 260  | 28840 | 27  |
| MOU-MNP-03_01    | 8.4  | 0.14 | 2.2 | 0.090  | 43.4 | 0.82  | 94   | 484  | 197 | 326  | 26780 | 12  |
| MOU-MNP-03_02    | 9.8  | 0.16 | 2.9 | 0.134  | 40.3 | 0.80  | 100  | 468  | 170 | 354  | 23940 | 18  |
| MOU-MNP-04_01    | 2.8  | 0.10 | 1.5 | 0.069  | 56.4 | 0.21  | 1564 | 501  | 468 | 247  | 2217  | 51  |
| MOU-MNP-04_02    | 3.8  | 0.10 | 1.2 | 0.072  | 55.2 | 0.17  | 1610 | 519  | 467 | 262  | 1843  | 48  |
| MOU-MNP-05_01    | 24.5 | 0.92 | 2.2 | 0.345  | 21.3 | 0.98  | 9    | 319  | 62  | 206  | 19030 | 31  |
| MOU-MNP-05_02    | 25.1 | 0.91 | 2.1 | 0.316  | 21.2 | 0.95  | 14   | 303  | 65  | 211  | 20080 | 20  |
| MOU-MNP-06_01    | 6.0  | 0.89 | 0.5 | 0.294  | 42.1 | 0.44  | 1207 | 1817 | 109 | 2346 | 25160 | 11  |
| MOU-MNP-06_02    | 9.6  | 0.97 | 0.6 | 0.297  | 40.6 | 0.48  | 1311 | 1892 | 111 | 2196 | 22020 | 11  |
| MOU-MNP-06_03    | 1.9  | 0.64 | 0.4 | 0.283  | 47.5 | 0.17  | 1480 | 2019 | 119 | 1877 | 19650 | 11  |
| MOU-MNP-06_04    | 6.4  | 0.73 | 0.4 | 0.410  | 35.6 | 0.42  | 1024 | 1612 | 98  | 1424 | 11350 | 8   |
| MOU-MNP-07_01    | 11.9 | 0.47 | 2.3 | 0.414  | 32.4 | 0.54  | 238  | 313  | 43  | 218  | 33900 | 24  |
| MOU-MNP-07_02    | 11.3 | 0.41 | 1.6 | 0.387  | 36.3 | 0.46  | 294  | 325  | 51  | 214  | 36050 | 19  |
| MOU-MNP-07_03    | 9.1  | 0.37 | 1.6 | 0.388  | 36.6 | 0.46  | 289  | 313  | 59  | 190  | 36000 | 9   |
| MOU-MNP-07_04    | 13.4 | 0.52 | 1.8 | 0.359  | 35.4 | 0.64  | 300  | 335  | 56  | 262  | 37050 | 26  |
| MOU-MNP-07_05    | 12.8 | 0.52 | 1.8 | 0.367  | 35.4 | 0.67  | 301  | 354  | 46  | 260  | 36200 | 34  |
| MOU-MNP-08_01    | 15.9 | 0.44 | 1.5 | 0.085  | 35.5 | 0.49  | 86   | 344  | 145 | 121  | 766   | 11  |
| MOU-MNP-08_02    | 16.7 | 0.51 | 1.8 | 0.084  | 33.5 | 0.56  | 88   | 350  | 133 | 104  | 1052  | 11  |
| MOU-MNP-09_01    | 8.4  | 0.35 | 1.2 | 0.016  | 46.0 | 0.51  | 158  | 415  | 261 | 76   | 9762  | 114 |
| MOU-MNP-09_02    | 5.5  | 0.28 | 1.7 | 0.019  | 50.4 | 0.45  | 208  | 448  | 296 | 85   | 9483  | 73  |
| MOU-MNP-09_03    | 8.3  | 0.42 | 1.6 | 0.115  | 44.1 | 0.37  | 182  | 375  | 123 | 716  | 13950 | 11  |
| MOU-MNP-09_04    | 6.8  | 0.38 | 1.2 | 0.139  | 45.4 | 0.24  | 164  | 361  | 126 | 761  | 13730 | 11  |
| MOU-MNP-10_01    | 2.9  | 0.32 | 0.4 | 0.0037 | 55.4 | 0.71  | 71   | 305  | 473 | 431  | 49780 | 350 |
| MOU-MNP-10_02    | 4.6  | 0.27 | 0.4 | 0.0038 | 54.1 | 0.64  | 65   | 316  | 496 | 434  | 50770 | 362 |
| MOU-MNP-11_01    | 15.7 | 0.60 | 1.1 | 0.465  | 31.2 | 1.21  | 141  | 292  | 74  | 426  | 53700 | 834 |
| MOU-MNP-11_02    | 13.2 | 0.51 | 1.0 | 0.218  | 34.8 | 1.00  | 170  | 275  | 91  | 289  | 49470 | 586 |
| MOU-MNP-12_01    | 4.3  | 0.21 | 0.6 | 0.031  | 54.3 | 0.53  | 170  | 279  | 190 | 376  | 6786  | 15  |
| MOU-MNP-12_02    | 5.7  | 0.25 | 0.6 | 0.027  | 52.1 | 0.58  | 174  | 275  | 148 | 397  | 7250  | 35  |
| MOU-MNP-13_01    | 12.7 | 0.40 | 1.2 | 0.064  | 39.7 | 0.66  | 84   | 357  | 309 | 188  | 6570  | 21  |
| MOU-MNP-13_02    | 11.9 | 0.36 | 1.1 | 0.051  | 38.9 | 0.84  | 103  | 363  | 352 | 208  | 6750  | 34  |
| MOU-MNP-14_01    | 11.1 | 0.42 | 0.5 | 0.075  | 42.9 | 0.49  | 91   | 242  | 103 | 567  | 5557  | 12  |
| MOU-MNP-14_02    | 8.9  | 0.42 | 0.5 | 0.064  | 46.4 | 0.48  | 113  | 273  | 111 | 578  | 5877  | 13  |
| MOU-MNP-15_01    | 9.4  | 0.61 | 1.8 | 0.199  | 39.0 | 0.87  | 519  | 522  | 169 | 2140 | 24170 | 11  |
| MOU-MNP-15_02    | 8.9  | 0.59 | 1.6 | 0.222  | 40.1 | 0.83  | 515  | 535  | 162 | 2438 | 25880 | 11  |
| MOU-MNP-16_01    | 11.6 | 0.39 | 1.6 | 0.066  | 40.7 | 0.50  | 132  | 336  | 259 | 148  | 3565  | 49  |
| MOU-MNP-16_02    | 11.8 | 0.32 | 1.3 | 0.067  | 40.9 | 0.41  | 123  | 333  | 275 | 154  | 3098  | 39  |
| MOU-MNP-17_01    | 13.7 | 0.41 | 1.8 | 0.082  | 36.3 | 0.51  | 63   | 290  | 139 | 83   | 5355  | 1   |
| MOU-MNP-17_02    | 16.2 | 0.45 | 2.0 | 0.020  | 33.8 | 0.55  | 77   | 280  | 149 | 92   | 15580 | 11  |
| MOU-MNP-17_03    | 16.0 | 0.42 | 1.6 | 0.057  | 33.6 | 0.59  | 60   | 337  | 145 | 97   | 9727  | 10  |
| MOU-MNP-17_04    | 17.0 | 0.58 | 3.6 | 0.089  | 29.9 | 0.75  | 76   | 318  | 147 | 99   | 3716  | 10  |
| MOU-MNP-17_05    | 15.2 | 0.62 | 3.1 | 0.080  | 33.2 | 0.76  | 82   | 306  | 179 | 108  | 4058  | 12  |
| MOU-MNP-17_06    | 16.6 | 0.59 | 3.9 | 0.088  | 29.6 | 0.78  | 63   | 325  | 146 | 105  | 3348  | 10  |
| MOU-MNP-18_01    | 12.0 | 0.57 | 2.3 | 0.088  | 38.9 | 0.81  | 107  | 241  | 111 | 790  | 6391  | 13  |
| MOU-MNP-18_02    | 10.6 | 0.54 | 2.1 | 0.091  | 41.1 | 0.77  | 121  | 254  | 103 | 772  | 6095  | 12  |
| MOU-MNP-18_03    | 13.1 | 0.50 | 1.5 | 0.088  | 39.0 | 0.58  | 86   | 278  | 89  | 490  | 4203  | 17  |
| MOU-MNP-18_04    | 13.2 | 0.49 | 1.4 | 0.090  | 38.8 | 0.56  | 81   | 278  | 94  | 469  | 4514  | 11  |
| MOU-MNP-19_01    | 7.6  | 0.43 | 1.3 | 0.062  | 44.8 | 0.56  | 579  | 303  | 182 | 93   | 3048  | 33  |
| MOU-MNP-19_02    | 15.4 | 0.75 | 1.9 | 0.155  | 34.5 | 0.82  | 402  | 320  | 95  | 512  | 25540 | 11  |
| MOU-MNP-19_03    | 18.4 | 0.79 | 1.7 | 0.626  | 28.3 | 0.90  | 350  | 304  | 65  | 818  | 30280 | 9   |
| MOU-MNP-20_01    | 17.3 | 1.18 | 1.1 | 0.375  | 31.6 | 0.87  | 714  | 423  | 173 | 953  | 34010 | 10  |
| MOU-MNP-20_02    | 16.2 | 1.13 | 1.0 | 0.412  | 32.1 | 0.76  | 679  | 405  | 170 | 956  | 34640 | 10  |
| MOU-MNP-20_03    | 11.3 | 1.11 | 1.1 | 0.768  | 33.8 | 0.00  | 497  | 367  | 149 | 2415 | 42380 | 10  |
| MOU-G&D-9796_01  | 17.2 | 0.81 | 4.1 | 0.596  | 24.6 | 0.71  | 82   | 354  | 75  | 2811 | 49210 | 10  |
| MOU-G&D-9796_02  | 15.9 | 0.71 | 3.0 | 0.484  | 30.5 | 0.59  | 177  | 375  | 111 | 2143 | 46680 | 10  |
| MOU-G&D-9796_03  | 17.0 | 0.72 | 3.2 | 0.477  | 29.5 | 0.61  | 198  | 407  | 105 | 2340 | 46170 | 10  |
| MOU-G&D-11571_01 | 12.2 | 0.41 | 1.5 | 0.081  | 40.6 | 0.59  | 104  | 336  | 127 | 104  | 1069  | 25  |

| Piece             | Si   | K    | Ca  | Ti            | Mn   | Fe          | Ni  | Zn  | As  | Sr   | Ba    | Pb  |
|-------------------|------|------|-----|---------------|------|-------------|-----|-----|-----|------|-------|-----|
| MOU-G&D-11571_02  | 13.4 | 0.63 | 2.6 | 0.082         | 34.4 | 0.84        | 131 | 338 | 148 | 122  | 1559  | 27  |
| MOU-G&D-11571_03  | 15.6 | 0.48 | 1.3 | 0.082         | 35.2 | 0.67        | 85  | 310 | 107 | 88   | 816   | 12  |
| MOU-G&D-7527-a_01 | 19.2 | 0.37 | 1.9 | 0.142         | 27.1 | 0.50        | 28  | 301 | 162 | 150  | 14410 | 11  |
| MOU-G&D-7527-a_02 | 16.2 | 0.54 | 1.1 | 0.156         | 35.7 | 0.43        | 42  | 302 | 188 | 163  | 17710 | 11  |
| MOU-G&D-7527-b_01 | 15.4 | 0.29 | 1.1 | 0.065         | 34.5 | 0.44        | 85  | 302 | 189 | 135  | 4923  | 13  |
| MOU-G&D-7527-b_02 | 17.8 | 0.25 | 0.9 | 0.050         | 33.5 | 0.44        | 57  | 282 | 159 | 134  | 6801  | 11  |
| MOU-G&D-7527-b_03 | 17.2 | 0.28 | 0.9 | 0.048         | 32.1 | 0.45        | 56  | 277 | 180 | 110  | 6929  | 1   |
| MOU-G&D-6857_01   | 17.3 | 0.53 | 2.5 | 0.092         | 28.4 | 0.67        | 56  | 330 | 123 | 153  | 3207  | 12  |
| MOU-G&D-6857_02   | 16.6 | 0.59 | 2.0 | 0.086         | 30.1 | 0.65        | 73  | 344 | 140 | 145  | 2251  | 12  |
| MOU-MNP-L&R-H7_01 | 6.1  | 0.18 | 0.4 | 0.043         | 51.2 | 0.13        | 123 | 326 | 798 | 196  | 9180  | 13  |
| MOU-MNP-L&R-H7_02 | 10.5 | 0.19 | 0.6 | <i>0.0036</i> | 44.2 | 0.05        | 137 | 348 | 758 | 348  | 13400 | 25  |
| MOU-MNP-L&R-H7_03 | 9.4  | 0.23 | 0.6 | 0.074         | 46.4 | 0.32        | 126 | 332 | 690 | 207  | 7922  | 12  |
| MOU-MNP-L&R-H8_01 | 5.2  | 0.27 | 0.7 | 0.004         | 53.5 | 0.21        | 470 | 377 | 306 | 427  | 7279  | 37  |
| MOU-MNP-L&R-H8_02 | 6.0  | 0.44 | 1.1 | <i>0.0037</i> | 50.9 | 0.28        | 468 | 373 | 245 | 854  | 11710 | 61  |
| MOU-MNP-L&R-H8_03 | 9.0  | 0.47 | 1.1 | 0.034         | 46.1 | 0.49        | 354 | 348 | 225 | 604  | 8139  | 19  |
| MOU-G&D-4584a1_01 | 4.7  | 0.34 | 1.1 | 0.033         | 51.5 | 0.45        | 512 | 417 | 178 | 723  | 17300 | 13  |
| MOU-G&D-4584a1_02 | 6.0  | 0.30 | 1.1 | 0.133         | 48.6 | 0.39        | 438 | 384 | 157 | 637  | 15520 | 12  |
| MOU-G&D-4584a1_03 | 7.5  | 0.43 | 1.3 | 0.049         | 48.4 | 0.54        | 740 | 461 | 133 | 182  | 4799  | 41  |
| MOU-G&D-5255a1_01 | 9.3  | 0.45 | 1.0 | <i>0.004</i>  | 45.5 | <i>0.01</i> | 268 | 390 | 481 | 984  | 18510 | 16  |
| MOU-G&D-5255a1_02 | 6.6  | 0.40 | 1.0 | <i>0.004</i>  | 49.7 | <i>0.01</i> | 277 | 406 | 492 | 967  | 18340 | 30  |
| MOU-G&D-5255a1_03 | 8.5  | 0.38 | 1.0 | <i>0.004</i>  | 47.0 | <i>0.01</i> | 271 | 408 | 493 | 871  | 17030 | 32  |
| MOU-G&D-5902a2_01 | 13.7 | 0.83 | 1.6 | 0.246         | 34.5 | 1.72        | 257 | 459 | 230 | 966  | 18460 | 14  |
| MOU-G&D-5902a2_02 | 15.4 | 0.83 | 1.6 | 0.250         | 31.9 | 1.69        | 207 | 432 | 199 | 865  | 16760 | 11  |
| MOU-G&D-5902a2_03 | 15.9 | 0.82 | 1.5 | 0.308         | 31.2 | 1.66        | 193 | 433 | 202 | 938  | 17510 | 11  |
| MOU-G&D-6846a_01  | 11.3 | 0.37 | 1.5 | 0.078         | 42.5 | 0.37        | 104 | 317 | 233 | 171  | 1369  | 13  |
| MOU-G&D-6846a_02  | 14.6 | 0.34 | 1.9 | 0.085         | 36.5 | 0.61        | 67  | 319 | 186 | 133  | 1433  | 11  |
| MOU-G&D-6846a_03  | 11.9 | 0.27 | 1.5 | 0.081         | 39.9 | 0.47        | 82  | 277 | 168 | 103  | 887   | 11  |
| MOU-G&D-8975_01   | 19.2 | 0.68 | 2.4 | 0.754         | 22.1 | 0.96        | 27  | 254 | 55  | 1322 | 33320 | 232 |
| MOU-G&D-8975_02   | 20.1 | 0.65 | 2.3 | 0.756         | 21.6 | 0.99        | 16  | 259 | 52  | 1291 | 31260 | 237 |
| MOU-G&D-8975_03   | 24.8 | 0.74 | 1.3 | 0.667         | 18.6 | 0.98        | 5   | 265 | 42  | 1287 | 30480 | 227 |
| MOU-G&D-9858a_01  | 6.7  | 0.27 | 1.6 | 0.015         | 48.5 | 0.39        | 198 | 300 | 213 | 180  | 7330  | 53  |
| MOU-G&D-9858a_02  | 6.4  | 0.30 | 1.5 | <i>0.0036</i> | 50.2 | 0.39        | 198 | 294 | 205 | 217  | 10770 | 40  |
| MOU-G&D-9858a_03  | 5.3  | 0.21 | 1.2 | 0.033         | 52.7 | 0.31        | 201 | 322 | 196 | 193  | 5067  | 47  |
| MOU-G&D-9858a_04  | 6.6  | 0.27 | 1.5 | 0.015         | 48.9 | 0.36        | 217 | 318 | 200 | 193  | 7190  | 72  |
| MOU-G&D-9858b_01  | 11.0 | 0.43 | 2.2 | 0.527         | 34.0 | 0.38        | 201 | 347 | 102 | 1383 | 26300 | 9   |
| MOU-G&D-9858b_02  | 9.4  | 0.40 | 2.4 | 0.397         | 38.5 | 0.37        | 270 | 366 | 124 | 1495 | 27490 | 10  |
| MOU-G&D-9858b_03  | 10.8 | 0.50 | 2.3 | 0.288         | 36.9 | 0.84        | 295 | 458 | 152 | 2189 | 30190 | 11  |
| MOU-G&D-9858b_04  | 9.8  | 0.41 | 2.4 | 0.249         | 37.1 | 0.75        | 268 | 427 | 143 | 1974 | 27640 | 10  |
| MOU-G&D-11869_01  | 8.7  | 0.39 | 2.5 | 0.078         | 44.4 | 0.55        | 164 | 357 | 191 | 137  | 1339  | 30  |
| MOU-G&D-11869_02  | 8.6  | 0.37 | 2.3 | 0.080         | 45.3 | 0.49        | 141 | 342 | 180 | 128  | 1176  | 15  |
| MOU-G&D-11869_03  | 7.4  | 0.25 | 1.3 | 0.037         | 48.1 | 0.79        | 149 | 336 | 207 | 153  | 7736  | 152 |
| MOU-G&D-11236b_01 | 2.1  | 0.22 | 1.1 | 0.944         | 36.3 | 0.55        | 241 | 415 | 114 | 3334 | 39320 | 9   |
| MOU-G&D-11236b_02 | 3.2  | 0.28 | 1.3 | 0.916         | 38.9 | 0.68        | 278 | 500 | 131 | 4018 | 41640 | 10  |
| MOU-G&D-11236b_03 | 4.4  | 0.32 | 2.6 | 0.909         | 34.0 | <i>0.00</i> | 224 | 434 | 116 | 3304 | 36820 | 9   |
| MOU-G&D-12575a_01 | 9.9  | 0.38 | 2.6 | 0.080         | 42.1 | 0.58        | 113 | 252 | 228 | 139  | 1137  | 14  |
| MOU-G&D-12575a_02 | 10.4 | 0.25 | 1.3 | 0.080         | 43.5 | 0.40        | 92  | 266 | 166 | 108  | 1010  | 12  |
| MOU-G&D-12575a_03 | 12.7 | 0.48 | 2.4 | 0.086         | 38.1 | 0.68        | 117 | 247 | 177 | 125  | 1056  | 12  |
| MOU-G&D-13440_01  | 8.7  | 0.56 | 2.3 | 0.512         | 38.7 | 0.13        | 99  | 314 | 81  | 193  | 34990 | 10  |
| MOU-G&D-13440_02  | 8.9  | 0.48 | 2.0 | 0.687         | 35.7 | 0.84        | 80  | 315 | 107 | 135  | 36020 | 10  |
| MOU-G&D-13440_03  | 9.6  | 0.48 | 2.0 | 0.719         | 35.2 | 0.83        | 71  | 319 | 107 | 139  | 34110 | 9   |

Major and minor elements are given in mass percentages, trace elements in parts per million; figures in italics indicate concentrations below the limit of detection calculated multiplying the equipment detection limit by 0.6 [106].



**Table F. Coefficient of variation of elements composing the Mn-rich black lumps from Le Moustier**

| Piece          | Si | K  | Ca | Ti  | Mn | Fe  | Ni | Zn | As | Sr | Ba  | Pb  |
|----------------|----|----|----|-----|----|-----|----|----|----|----|-----|-----|
| MOU-MNP-01     | 28 | 14 | 27 | 6   | 4  | 4   | 37 | 8  | 15 | 21 | 4   | 6   |
| MOU-MNP-02     | 54 | 24 | 54 | 48  | 15 | 146 | 13 | 73 | 19 | 15 | 9   | 78  |
| MOU-MNP-03     | 11 | 10 | 20 | 28  | 5  | 2   | 4  | 2  | 10 | 6  | 8   | 55  |
| MOU-MNP-04     | 21 | 2  | 14 | 2   | 1  | 13  | 2  | 2  | 0  | 4  | 13  | 4   |
| MOU-MNP-05     | 2  | 1  | 6  | 6   | 0  | 3   | 27 | 3  | 3  | 2  | 4   | 30  |
| MOU-MNP-06     | 59 | 20 | 20 | 19  | 11 | 37  | 14 | 8  | 7  | 21 | 30  | 14  |
| MOU-MNP-07     | 14 | 14 | 16 | 6   | 5  | 18  | 9  | 5  | 13 | 14 | 3   | 47  |
| MOU-MNP-08     | 3  | 10 | 12 | 1   | 4  | 10  | 1  | 1  | 6  | 11 | 22  | 0   |
| MOU-MNP-09     | 19 | 17 | 17 | 89  | 6  | 30  | 13 | 10 | 45 | 93 | 21  | 105 |
| MOU-MNP-10     | 33 | 10 | 10 | 2   | 2  | 7   | 7  | 2  | 3  | 0  | 1   | 2   |
| MOU-MNP-11     | 12 | 12 | 4  | 51  | 8  | 13  | 13 | 4  | 14 | 27 | 6   | 25  |
| MOU-MNP-12     | 21 | 9  | 0  | 10  | 3  | 7   | 2  | 1  | 18 | 4  | 5   | 80  |
| MOU-MNP-13     | 5  | 8  | 4  | 15  | 1  | 18  | 14 | 1  | 9  | 7  | 2   | 33  |
| MOU-MNP-14     | 16 | 2  | 7  | 11  | 5  | 1   | 15 | 9  | 6  | 1  | 4   | 6   |
| MOU-MNP-15     | 4  | 3  | 10 | 8   | 2  | 3   | 0  | 2  | 3  | 9  | 5   | 0   |
| MOU-MNP-16     | 1  | 13 | 16 | 2   | 0  | 13  | 5  | 1  | 4  | 3  | 10  | 16  |
| MOU-MNP-17     | 7  | 19 | 37 | 38  | 8  | 18  | 13 | 7  | 9  | 9  | 69  | 44  |
| MOU-MNP-18     | 10 | 7  | 25 | 2   | 3  | 18  | 19 | 7  | 10 | 28 | 21  | 47  |
| MOU-MNP-19     | 40 | 30 | 19 | 108 | 23 | 23  | 27 | 3  | 53 | 77 | 74  | 99  |
| MOU-MNP-20     | 21 | 3  | 4  | 42  | 3  | 87  | 18 | 7  | 8  | 59 | 13  | 1   |
| MOU-G&D-9796   | 4  | 7  | 17 | 13  | 11 | 10  | 40 | 7  | 20 | 14 | 3   | 74  |
| MOU-G&D-11571  | 12 | 23 | 37 | 1   | 9  | 18  | 21 | 5  | 16 | 16 | 33  | 53  |
| MOU-G&D-7527-a | 12 | 27 | 37 | 7   | 19 | 11  | 29 | 0  | 10 | 6  | 15  | 0   |
| MOU-G&D-7527-b | 7  | 9  | 8  | 17  | 4  | 1   | 25 | 5  | 9  | 11 | 18  | 90  |
| MOU-G&D-6857   | 3  | 8  | 16 | 5   | 4  | 2   | 19 | 3  | 9  | 4  | 25  | 0   |
| MOU-MNP-L&R-H7 | 26 | 13 | 17 | 90  | 8  | 83  | 6  | 3  | 7  | 34 | 28  | 70  |
| MOU-MNP-L&R-H8 | 29 | 28 | 21 | 132 | 7  | 45  | 15 | 4  | 16 | 34 | 26  | 54  |
| MOU-G&D-4584a1 | 23 | 19 | 10 | 75  | 3  | 16  | 28 | 9  | 14 | 57 | 54  | 100 |
| MOU-G&D-5255a1 | 17 | 9  | 2  | 0   | 4  | 1   | 2  | 3  | 1  | 7  | 5   | 33  |
| MOU-G&D-5902a2 | 8  | 0  | 5  | 13  | 5  | 2   | 15 | 3  | 8  | 6  | 5   | 40  |
| MOU-G&D-6846a  | 14 | 16 | 13 | 4   | 7  | 25  | 22 | 8  | 17 | 25 | 24  | 10  |
| MOU-G&D-8975   | 14 | 7  | 29 | 7   | 9  | 1   | 67 | 2  | 14 | 1  | 5   | 2   |
| MOU-G&D-9858a  | 11 | 15 | 11 | 77  | 4  | 11  | 5  | 4  | 4  | 8  | 31  | 26  |
| MOU-G&D-9858b  | 8  | 10 | 3  | 34  | 5  | 42  | 16 | 13 | 17 | 22 | 6   | 9   |
| MOU-G&D-11869  | 8  | 22 | 33 | 37  | 4  | 26  | 8  | 3  | 7  | 9  | 109 | 115 |
| MOU-G&D-11236b | 51 | 20 | 50 | 0   | 7  | 88  | 12 | 11 | 9  | 12 | 6   | 9   |
| MOU-G&D-12575a | 14 | 32 | 32 | 4   | 7  | 25  | 12 | 4  | 17 | 12 | 6   | 9   |
| MOU-G&D-13440  | 6  | 9  | 9  | 17  | 5  | 68  | 17 | 1  | 16 | 21 | 3   | 4   |

Values expressed as percentage.

**Table G. Results of SEM-EDS analyses of Mn-rich lumps from Le Moustier**

| Piece        | Description |                    |                |                   |                  | Semi-quantitative EDS analyses (**) |               |            |                                                  | Feature interpretation                        | General interpretation                                             |
|--------------|-------------|--------------------|----------------|-------------------|------------------|-------------------------------------|---------------|------------|--------------------------------------------------|-----------------------------------------------|--------------------------------------------------------------------|
|              | N           | Feature morphology | BSE * contrast | Grain length (µm) | Grain width (µm) | >10%                                | 3-10%         | 3-1%       | <1%                                              |                                               |                                                                    |
| MOU-MNP-04   | 6           | Blocky / Foliat.   | Light grey     | 26.43             | 14.29            | <b>Mn</b>                           |               |            | Ca, Si, Al, Fe, Ba, Sr, Zn, P, K, As, Mg, Na, Cl | Mn compound - Ba, Zn, As traces               | Mn compound (Ba, Zn, As traces)                                    |
|              | 4           | Acicular           | White          | Submicr.          | Submicr.         | <b>Mn</b>                           | Ba            |            | K, Ca, Fe, Al, Sr, Si, Zn, P, Mg, S, As, Na, Cl  | Mn/Ba compound - Zn, As traces                | Mn/Ba compound (Zn, As traces with silicates and aluminosilicates) |
| MOU-MNP-06   | 1           | Irreg. tablet      | Dark grey      | 22.48             | 17.06            | Si, Fe                              | Al, Mn, Mg, K | Ba         | Ti, Ca, Zn                                       | Mg/K-rich aluminosilicate                     |                                                                    |
|              | 1           | Irreg. fac. cryst. | Dark grey      | 10.54             | 10.71            | Si, Al                              | Mn            | Ca, Fe, Ba | Mg, K, Zn, Ti                                    | Na-rich silicate (feldspar)                   |                                                                    |
|              | 1           | Irreg. fac. cryst. | Dark grey      | 15.01             | 9.36             | <b>Si</b>                           | Mn            |            | Al, Ba, Fe, K, Zn, Mg                            | Silicate (quartz)                             |                                                                    |
|              | 1           | Irreg. tablet      | Dark grey      | 92.86             | 57.87            | Si, Al, Mn                          | K             |            | Fe, Ba, Na, Mg, Ti, Ca, As                       | K-rich aluminosilicate (mica) - Ti, As traces | Mn + Mn/Ba compound (As traces) + aluminosilicates (Ti traces)     |
| MOU-G&D-6857 | 1           | Acic.              | White          | 3                 | 0.1              | Mn, Si, Al                          | Ba, K         | Fe         | Mg, Na, Ti, Ca, P, S                             | Mn/Ba compound - Ti traces                    |                                                                    |
|              | 2           | Blocky             | White          | 1.5               | 1.5              | <b>Mn</b>                           |               | Si, Al, Fe | Ba, K, Ca, P, Mg, Ti, Na, S                      | Mn compound - Ba, Ti traces                   |                                                                    |

N: Number of analysed features; BSE: backscattered electrons; Irreg. fac. cryst: irregular faceted crystals; (\*): White, grey and dark grey refer to the contrast observed on BSE images. (\*\*) Weight percentages including O and normalised to 100%. Elements in bold are present in a proportion equal or higher than 40 %.

**Table H. Processing techniques, degree of modification, facet morphology, and striations main orientation of Mn-rich black lumps from Le Moustier**

| Piece           | Percussion | Notching<br>or scraping | Grinding | Smoothing | Degree of<br>modification | Number<br>of facets | Striations on<br>facets | Facet morphology |         |         |       | Striation orientation |         |               |        |              |
|-----------------|------------|-------------------------|----------|-----------|---------------------------|---------------------|-------------------------|------------------|---------|---------|-------|-----------------------|---------|---------------|--------|--------------|
|                 |            |                         |          |           |                           |                     |                         | Flat             | Convexe | Concave | Undet | Parallel              | Oblique | Perpendicular | Absent | 2 directions |
| MOU-MNP-01      | No         | No                      | Yes      | No        | Intense                   | 1                   | Yes                     | 1                |         |         |       | 1                     |         |               |        |              |
| MOU-MNP-02      | No         | No                      | Yes      | No        | Intense                   | 2                   | Yes                     |                  | 1       |         | 1     | 2                     |         |               |        |              |
| MOU-MNP-03      | No         | No                      | Yes      | No        | Intense                   | 3                   | Yes                     | 1                | 1       | 1       |       | 1                     | 1       |               | 1      |              |
| MOU-MNP-04      | No         | No                      | Yes      | Yes       | Intense                   | 3                   | Yes                     | 2                | 1       |         |       |                       | 3       |               |        |              |
| MOU-MNP-05      | No         | No                      | Yes      | No        | Medium                    | 3                   | Yes                     | 2                | 1       |         |       |                       |         |               | 2      | 1            |
| MOU-MNP-06      | Possible   | No                      | No       | Yes       | NA                        | NA                  | No                      |                  |         |         |       |                       |         |               |        |              |
| MOU-MNP-07      | Yes        | No                      | No       | No        | Low                       | NA                  | No                      |                  |         |         |       |                       |         |               |        |              |
| MOU-MNP-08      | No         | No                      | Yes      | No        | Medium                    | 1                   | Yes                     |                  | 1       |         |       | 1                     |         |               |        |              |
| MOU-MNP-10      | Yes        | No                      | No       | No        | Low                       | NA                  | No                      |                  |         |         |       |                       |         |               |        |              |
| MOU-MNP-12      | No         | Yes                     | Yes      | Possible  | Intense                   | 4                   | Yes                     | 2                | 1       |         | 1     | 1                     |         |               |        | 3            |
| MOU-MNP-13      | No         | No                      | Yes      | No        | Intense                   | 4                   | Yes                     | 1                | 2       |         | 1     | 3                     |         |               | 1      |              |
| MOU-MNP-15      | Yes        | No                      | Yes      | No        | Medium                    | 2?                  | Yes                     | 1                |         |         | 1     |                       | 1       |               | 1      |              |
| MOU-MNP-16      | Yes        | No                      | Yes      | No        | Intense                   | 2?                  | Yes                     | 1                |         |         | 1     |                       | 1       |               | 1      |              |
| MOU-MNP-17      | No         | No                      | Possible | No        | NA                        | 1                   | No                      |                  |         |         | 1     |                       |         |               |        |              |
| MOU-MNP-19      | No         | No                      | Yes      | No        | Medium                    | 1                   | Yes                     | 1                |         |         |       |                       | 1       |               |        |              |
| MOU-MNP-20      | No         | No                      | Possible | Yes       | NA                        | NA                  | Not visibles            |                  |         |         | 1     |                       |         |               |        |              |
| MOU-MNP-L&R-H7  | No         | Yes                     | No       | No        | Intense                   | 3                   | No                      |                  | 1       | 2       |       |                       |         |               |        |              |
| MOU-MNP-L&R-H8  | No         | No                      | Yes      | No        | Intense                   | 4                   | Yes                     |                  | 3       | 1       |       |                       |         |               | 4      |              |
| MOU-G&D-6846-a  | No         | No                      | Yes      | No        | Intense                   | 2                   | Yes                     |                  | 2       |         |       |                       | 1       |               | 1      |              |
| MOU-G&D-6846-b  | No         | No                      | Yes      | Yes       | Intense                   | 2                   | Not visibles            |                  | 2       |         |       |                       |         |               | 2      |              |
| MOU-G&D-6846-c  | No         | No                      | Yes      | Yes       | Medium                    | 1                   | Not visibles            |                  | 1       |         |       |                       |         |               | 1      |              |
| MOU-G&D-6857    | No         | No                      | Yes      | Yes       | Very intense              | 5                   | No                      |                  | 1       | 4       |       |                       | 1       |               | 4      |              |
| MOU-G&D-7527-a  | No         | No                      | Yes      | No        | Low                       | 1                   | Yes                     |                  | 1       |         |       | 1                     |         |               |        |              |
| MOU-G&D-7527-b  | No         | No                      | Yes      | No        | Medium                    | 1                   | Yes                     |                  | 1       |         |       |                       |         |               |        | 1            |
| MOU-G&D-4584-a3 | Possible   | No                      | No       | No        | NA                        | NA                  | No                      |                  |         |         |       |                       |         |               |        |              |
| MOU-G&D-4584-a4 | Possible   | No                      | No       | No        | NA                        | NA                  | No                      |                  |         |         |       |                       |         |               |        |              |
| MOU-G&D-4584-a5 | Possible   | No                      | No       | No        | NA                        | NA                  | No                      |                  |         |         |       |                       |         |               |        |              |
| MOU-G&D-4584-a6 | Possible   | No                      | No       | No        | NA                        | NA                  | No                      |                  |         |         |       |                       |         |               |        |              |
| MOU-G&D-9796    | Yes        | No                      | Yes      | Yes       | Medium                    | 3                   | Not visibles            |                  | 2       | 1       |       |                       |         |               | 3      |              |
| MOU-G&D-11571   | No         | No                      | Yes      | Yes       | Medium                    | 4                   | Yes                     |                  | 2       | 2       |       | 2                     |         |               | 2      |              |
| MOU-G&D-8975    | No         | No                      | Yes      | Yes       | Intense                   | 3                   | Yes                     |                  | 2       | 1       |       | 1                     |         |               | 2      |              |
| MOU-G&D-9858-a  | No         | No                      | Yes      | Yes       | Medium                    | 3                   | Yes                     |                  | 1       | 2       |       |                       | 1       |               | 2      |              |
| MOU-G&D-11869   | No         | No                      | Yes      | No        | Intense                   | 6                   | Yes                     |                  | 6       |         |       |                       | 1       |               |        |              |
| MOU-G&D-11236-b | Possible   | No                      | Yes      | Yes       | Low                       | 3                   | Yes                     |                  | 1       | 1       | 1     |                       | 2       |               | 1      |              |
| MOU-G&D-12575-a | No         | No                      | Yes      | Yes       | Medium                    | 2                   | Not visibles            |                  | 1       | 1       |       |                       |         |               |        |              |

NA: not applicable

**Table I. Results of EDXRF analysis of geological samples**

| Code   | Si   | K    | Ca   | Ti    | Mn   | Fe    | Ni      | Zn     | As     | Sr     | Ba     | Pb      |
|--------|------|------|------|-------|------|-------|---------|--------|--------|--------|--------|---------|
| ALB-01 | 7.5  | 0.39 | 20.1 | 0.161 | 6.6  | 0.001 | 0.00061 | 0.0277 | 0.0008 | 0.0135 | 1.08   | 0.0708  |
| ALB-01 | 8.7  | 0.39 | 20.1 | 0.163 | 6.6  | 0.001 | 0.00064 | 0.0227 | 0.0008 | 0.0112 | 1.10   | 0.0680  |
| ALB-01 | 9.3  | 0.38 | 20.1 | 0.168 | 6.5  | 0.001 | 0.00063 | 0.0248 | 0.0016 | 0.0099 | 1.07   | 0.0648  |
| ALB-02 | 10.1 | 0.51 | 22.2 | 0.140 | 4.4  | 0.37  | 0.00062 | 0.0234 | 0.0025 | 0.0054 | 0.4094 | 0.0572  |
| ALB-02 | 9.8  | 0.49 | 22.1 | 0.140 | 4.4  | 0.31  | 0.00064 | 0.0198 | 0.0015 | 0.0070 | 0.4256 | 0.0573  |
| ALB-02 | 11.7 | 0.47 | 21.8 | 0.138 | 4.4  | 0.32  | 0.00063 | 0.0196 | 0.0017 | 0.0059 | 0.4210 | 0.0562  |
| ALB-03 | 2.4  | 0.01 | 35.6 | 0.079 | 3.8  | 0.16  | 0.0061  | 0.0183 | 0.0006 | 0.0123 | 0.0765 | 0.0012  |
| ALB-03 | 2.4  | 0.01 | 35.8 | 0.077 | 3.8  | 0.16  | 0.0067  | 0.0182 | 0.0006 | 0.0123 | 0.0886 | 0.0008  |
| ALB-03 | 2.4  | 0.01 | 37.1 | 0.080 | 3.8  | 0.17  | 0.0064  | 0.0176 | 0.0007 | 0.0092 | 0.0763 | 0.0009  |
| BEY-01 | 5.9  | 0.10 | 10.1 | 0.112 | 36.3 | 0.77  | 0.0545  | 0.1320 | 0.0281 | 0.0182 | 2.83   | 0.0013  |
| BEY-01 | 4.4  | 0.12 | 10.4 | 0.109 | 36.8 | 0.76  | 0.0556  | 0.1326 | 0.0305 | 0.0190 | 2.85   | 0.0013  |
| BEY-01 | 5.7  | 0.11 | 10.1 | 0.208 | 36.3 | 0.78  | 0.0542  | 0.1343 | 0.0305 | 0.0152 | 2.25   | 0.0013  |
| BEY-02 | 18.0 | 0.41 | 12.3 | 0.088 | 7.4  | 0.37  | 0.0105  | 0.1850 | 0.0030 | 0.0038 | 0.0703 | 0.0009  |
| BEY-02 | 18.0 | 0.42 | 12.3 | 0.088 | 7.4  | 0.38  | 0.0112  | 0.1838 | 0.0027 | 0.0047 | 0.0527 | 0.0001  |
| BEY-02 | 19.1 | 0.40 | 12.3 | 0.088 | 7.3  | 0.43  | 0.0112  | 0.1833 | 0.0024 | 0.0044 | 0.0581 | 0.0009  |
| BEY-02 | 18.0 | 0.41 | 12.1 | 0.087 | 7.4  | 0.38  | 0.0113  | 0.1778 | 0.0028 | 0.0058 | 0.0668 | 0.0009  |
| BEY-03 | 4.8  | 0.07 | 9.4  | 0.228 | 32.4 | 0.60  | 0.0384  | 0.1064 | 0.0292 | 0.0104 | 2.05   | 0.0010  |
| BEY-03 | 6.4  | 0.10 | 9.5  | 0.220 | 31.6 | 0.61  | 0.0377  | 0.1062 | 0.0280 | 0.0101 | 2.12   | 0.0010  |
| BEY-03 | 5.8  | 0.06 | 9.3  | 0.225 | 31.5 | 0.60  | 0.0389  | 0.1029 | 0.0270 | 0.0087 | 2.04   | 0.0010  |
| BEY-04 | 16.0 | 0.20 | 16.3 | 0.086 | 4.3  | 0.28  | 0.0035  | 0.1441 | 0.0010 | 0.0074 | 0.0196 | 0.0009  |
| BEY-04 | 13.8 | 0.17 | 16.4 | 0.085 | 4.4  | 0.28  | 0.0036  | 0.1431 | 0.0011 | 0.0066 | 0.0194 | 0.0009  |
| BEY-04 | 11.9 | 0.18 | 16.3 | 0.085 | 4.4  | 0.30  | 0.0047  | 0.1423 | 0.0017 | 0.0055 | 0.0292 | 0.0009  |
| BEY-05 | 22.8 | 0.38 | 11.2 | 0.089 | 5.9  | 0.36  | 0.0109  | 0.2049 | 0.0019 | 0.0109 | 0.0126 | 0.0012  |
| BEY-05 | 25.4 | 0.41 | 11.2 | 0.086 | 5.7  | 0.41  | 0.0095  | 0.2053 | 0.0018 | 0.0084 | 0.0369 | 0.0009  |
| BEY-05 | 23.9 | 0.43 | 11.3 | 0.087 | 5.8  | 0.42  | 0.0103  | 0.2063 | 0.0024 | 0.0101 | 0.0292 | 0.0009  |
| BEY-06 | 9.9  | 0.39 | 15.9 | 0.086 | 8.6  | 0.39  | 0.0173  | 0.2552 | 0.0035 | 0.0028 | 0.0856 | 0.0009  |
| BEY-06 | 9.8  | 0.41 | 15.9 | 0.089 | 8.6  | 0.38  | 0.0198  | 0.2502 | 0.0030 | 0.0053 | 0.0613 | 0.0001  |
| BEY-06 | 11.3 | 0.40 | 15.8 | 0.084 | 8.4  | 0.38  | 0.0177  | 0.2506 | 0.0035 | 0.0037 | 0.0790 | 0.0009  |
| BOU-01 | 22.6 | 0.67 | 1.1  | 0.252 | 18.3 | 4.2   | 0.0750  | 0.0447 | 0.0076 | 0.0120 | 0.8103 | 0.0080  |
| BOU-01 | 23.0 | 0.65 | 1.0  | 0.253 | 18.0 | 4.0   | 0.0726  | 0.0421 | 0.0082 | 0.0099 | 0.7774 | 0.0052  |
| BOU-01 | 22.6 | 0.62 | 1.0  | 0.258 | 18.2 | 4.0   | 0.0728  | 0.0434 | 0.0071 | 0.0120 | 0.7168 | 0.0081  |
| BOU-04 | 26.4 | 1.29 | 1.1  | 0.367 | 8.4  | 4.8   | 0.0149  | 0.0295 | 0.0079 | 0.0103 | 0.1103 | 0.0020  |
| BOU-04 | 25.6 | 1.32 | 1.1  | 0.370 | 8.6  | 4.9   | 0.0177  | 0.0362 | 0.0070 | 0.0136 | 0.1230 | 0.0060  |
| BOU-04 | 24.5 | 1.24 | 1.1  | 0.349 | 8.5  | 4.5   | 0.0167  | 0.0346 | 0.0068 | 0.0140 | 0.0991 | 0.0054  |
| BOU-06 | 8.3  | 0.31 | 0.5  | 0.163 | 27.6 | 11.8  | 0.0125  | 0.0251 | 0.0166 | 0.0217 | 0.3608 | 0.0016  |
| BOU-06 | 8.4  | 0.33 | 0.5  | 0.163 | 27.5 | 11.8  | 0.0118  | 0.0231 | 0.0169 | 0.0206 | 0.3383 | 0.0016  |
| BOU-06 | 8.4  | 0.36 | 0.6  | 0.156 | 27.8 | 12.5  | 0.0135  | 0.0251 | 0.0172 | 0.0217 | 0.4252 | 0.0017  |
| BOU-07 | 22.1 | 0.44 | 0.5  | 0.378 | 15.1 | 5.70  | 0.0213  | 0.0233 | 0.0096 | 0.0152 | 0.3121 | 0.0012  |
| BOU-07 | 23.0 | 0.45 | 0.5  | 0.420 | 14.4 | 5.76  | 0.0218  | 0.0221 | 0.0094 | 0.0150 | 0.2704 | 0.0012  |
| BOU-07 | 23.7 | 0.44 | 0.5  | 0.427 | 14.1 | 5.75  | 0.0208  | 0.0241 | 0.0098 | 0.0136 | 0.3022 | 0.0012  |
| CAU-01 | 4.7  | 0.01 | 26.2 | 0.164 | 8.3  | 0.18  | 0.0102  | 0.0208 | 0.0036 | 0.0256 | 1.15   | 0.0008  |
| CAU-01 | 4.2  | 0.02 | 26.8 | 0.169 | 8.4  | 0.15  | 0.0107  | 0.0218 | 0.0035 | 0.0275 | 1.19   | 0.00078 |
| CAU-01 | 3.1  | 0.01 | 26.1 | 0.162 | 8.4  | 0.14  | 0.0102  | 0.0176 | 0.0036 | 0.0252 | 1.14   | 0.00081 |
| CAU-02 | 2.6  | 0.13 | 31.7 | 0.059 | 7.7  | 0.84  | 0.0163  | 0.0197 | 0.0063 | 0.0702 | 1.42   | 0.0010  |
| CAU-02 | 2.6  | 0.16 | 31.9 | 0.059 | 7.6  | 0.86  | 0.0171  | 0.0193 | 0.0066 | 0.0703 | 1.36   | 0.0010  |
| CAU-02 | 2.6  | 0.17 | 32.0 | 0.041 | 7.6  | 0.86  | 0.0174  | 0.0214 | 0.0065 | 0.0679 | 1.44   | 0.0010  |
| CAU-03 | 3.0  | 0.01 | 27.9 | 0.138 | 7.3  | 0.48  | 0.0164  | 0.0243 | 0.0109 | 0.0567 | 0.9533 | 0.0008  |
| CAU-03 | 3.2  | 0.01 | 27.9 | 0.142 | 7.2  | 0.53  | 0.0151  | 0.0195 | 0.0111 | 0.0537 | 0.9277 | 0.0008  |
| CAU-03 | 2.9  | 0.01 | 27.5 | 0.149 | 7.4  | 0.51  | 0.0164  | 0.0205 | 0.0108 | 0.0556 | 0.9296 | 0.0008  |
| CAV-01 | 31.0 | 0.91 | 8.3  | 0.115 | 6.1  | 1.13  | 0.0008  | 0.1009 | 0.0020 | 0.0103 | 0.0120 | 0.0036  |
| CAV-01 | 30.9 | 0.96 | 8.3  | 0.118 | 6.2  | 1.20  | 0.0023  | 0.0999 | 0.0023 | 0.0083 | 0.0120 | 0.0021  |
| CAV-01 | 31.0 | 0.98 | 8.2  | 0.113 | 6.2  | 1.18  | 0.0022  | 0.1018 | 0.0018 | 0.0121 | 0.0374 | 0.0045  |
| CAV-02 | 32.7 | 0.70 | 5.9  | 0.099 | 7.2  | 1.00  | 0.0005  | 0.0571 | 0.0022 | 0.0106 | 0.1010 | 0.0021  |
| CAV-02 | 33.4 | 0.68 | 5.7  | 0.101 | 7.0  | 0.98  | 0.0005  | 0.0570 | 0.0021 | 0.0078 | 0.0982 | 0.0025  |
| CAV-02 | 33.1 | 0.65 | 5.7  | 0.097 | 7.1  | 0.98  | 0.0005  | 0.0566 | 0.0022 | 0.0106 | 0.1136 | 0.0021  |
| LOU-01 | 20.1 | 0.83 | 7.1  | 0.126 | 20.1 | 1.13  | 0.0158  | 0.5062 | 0.0033 | 0.0119 | 0.0477 | 0.0001  |

| Code   | Si   | K    | Ca   | Ti    | Mn   | Fe     | Ni     | Zn     | As     | Sr     | Ba     | Pb     |
|--------|------|------|------|-------|------|--------|--------|--------|--------|--------|--------|--------|
| LOU-01 | 19.3 | 0.89 | 7.1  | 0.124 | 20.2 | 1.06   | 0.0165 | 0.5132 | 0.0033 | 0.0160 | 0.0499 | 0.0011 |
| LOU-01 | 19.0 | 0.86 | 7.1  | 0.125 | 20.3 | 1.07   | 0.0173 | 0.5056 | 0.0017 | 0.0179 | 0.0527 | 0.0037 |
| LOU-02 | 35.8 | 0.70 | 4.0  | 0.131 | 6.7  | 0.75   | 0.0217 | 0.2993 | 0.0021 | 0.0332 | 0.0706 | 0.0010 |
| LOU-02 | 35.5 | 0.73 | 4.0  | 0.128 | 6.9  | 0.73   | 0.0223 | 0.3017 | 0.0020 | 0.0305 | 0.0906 | 0.0010 |
| LOU-02 | 35.7 | 0.76 | 4.0  | 0.131 | 6.8  | 0.71   | 0.0211 | 0.3048 | 0.0020 | 0.0311 | 0.0893 | 0.0010 |
| LOU-03 | 18.6 | 0.72 | 5.3  | 0.099 | 16.6 | 0.63   | 0.0073 | 0.3646 | 0.0022 | 0.0200 | 0.0632 | 0.0001 |
| LOU-03 | 23.8 | 0.76 | 5.2  | 0.095 | 14.9 | 0.61   | 0.0051 | 0.3569 | 0.0020 | 0.0217 | 0.0618 | 0.0001 |
| LOU-04 | 30.1 | 0.62 | 6.8  | 0.109 | 7.4  | 0.62   | 0.0031 | 0.2622 | 0.0015 | 0.0122 | 0.0565 | 0.0010 |
| LOU-04 | 31.1 | 0.68 | 7.0  | 0.107 | 7.2  | 0.64   | 0.0026 | 0.2722 | 0.0014 | 0.0099 | 0.0613 | 0.0010 |
| LOU-04 | 30.7 | 0.61 | 6.5  | 0.105 | 7.2  | 0.61   | 0.0021 | 0.2552 | 0.0012 | 0.0107 | 0.0658 | 0.0010 |
| SAL-01 | 2.50 | 0.01 | 30.8 | 0.146 | 11.1 | 0.06   | 0.0275 | 0.0302 | 0.0043 | 0.0763 | 1.21   | 0.0010 |
| SAL-01 | 2.50 | 0.01 | 30.8 | 0.148 | 11.1 | 0.07   | 0.0260 | 0.0257 | 0.0045 | 0.0759 | 1.21   | 0.0010 |
| SAL-01 | 2.50 | 0.01 | 30.7 | 0.149 | 11.2 | 0.05   | 0.0264 | 0.0319 | 0.0045 | 0.0784 | 1.21   | 0.0010 |
| SAL-02 | 2.3  | 0.10 | 33.8 | 0.099 | 5.6  | 0.19   | 0.0048 | 0.0150 | 0.0008 | 0.2138 | 0.4577 | 0.0008 |
| SAL-02 | 2.6  | 0.11 | 33.5 | 0.101 | 5.4  | 0.19   | 0.0027 | 0.0150 | 0.0008 | 0.2083 | 0.4231 | 0.0001 |
| SAL-02 | 2.3  | 0.07 | 32.7 | 0.095 | 5.5  | 0.18   | 0.0040 | 0.0150 | 0.0009 | 0.2043 | 0.4464 | 0.0008 |
| SAL-03 | 2.7  | 0.13 | 32.6 | 0.093 | 5.5  | 0.23   | 0.0027 | 0.0150 | 0.0007 | 0.2090 | 0.4451 | 0.0008 |
| SAL-03 | 2.4  | 0.12 | 32.7 | 0.093 | 5.5  | 0.22   | 0.0029 | 0.0150 | 0.0007 | 0.2072 | 0.4427 | 0.0008 |
| SAL-03 | 2.3  | 0.09 | 32.5 | 0.092 | 5.5  | 0.21   | 0.0042 | 0.0150 | 0.0009 | 0.2012 | 0.4613 | 0.0008 |
| SAR-01 | 30.7 | 0.79 | 0.1  | 0.225 | 10.5 | 0.65   | 0.0006 | 0.0150 | 0.0031 | 0.0185 | 0.8630 | 0.0001 |
| SAR-01 | 30.3 | 0.76 | 0.1  | 0.226 | 10.2 | 0.63   | 0.0006 | 0.0164 | 0.0037 | 0.0176 | 0.8793 | 0.0012 |
| SAR-01 | 28.8 | 0.76 | 0.1  | 0.248 | 9.5  | 0.65   | 0.0006 | 0.0231 | 0.0024 | 0.0206 | 0.6916 | 0.0012 |
| TEY-01 | 7.4  | 0.47 | 2.1  | 0.240 | 35.5 | 3.7    | 0.0309 | 0.0377 | 0.0100 | 0.0061 | 1.70   | 0.0012 |
| TEY-01 | 4.6  | 0.45 | 2.1  | 0.241 | 37.1 | 3.6    | 0.0334 | 0.0369 | 0.0111 | 0.0055 | 1.70   | 0.0012 |
| TEY-01 | 4.9  | 0.45 | 2.1  | 0.239 | 36.9 | 3.6    | 0.0343 | 0.0385 | 0.0090 | 0.0080 | 1.74   | 0.0012 |
| THE-02 | 2.6  | 0.01 | 38.5 | 0.166 | 6.8  | 0.24   | 0.0091 | 0.0328 | 0.0012 | 0.0027 | 1.31   | 0.0010 |
| THE-02 | 2.6  | 0.01 | 38.8 | 0.172 | 6.7  | 0.21   | 0.0104 | 0.0356 | 0.0006 | 0.0048 | 1.25   | 0.0010 |
| THE-02 | 2.6  | 0.01 | 38.9 | 0.173 | 6.5  | 0.23   | 0.0074 | 0.0354 | 0.0011 | 0.0021 | 1.26   | 0.0001 |
| THE-03 | 2.6  | 0.02 | 27.2 | 0.134 | 13.9 | 0.25   | 0.0171 | 0.0340 | 0.0020 | 0.0101 | 2.54   | 0.0010 |
| THE-03 | 2.6  | 0.02 | 27.3 | 0.127 | 13.7 | 0.23   | 0.0169 | 0.0348 | 0.0027 | 0.0100 | 2.54   | 0.0010 |
| THE-03 | 2.6  | 0.01 | 27.4 | 0.148 | 13.8 | 0.28   | 0.0157 | 0.0300 | 0.0026 | 0.0084 | 2.48   | 0.0010 |
| THE-06 | 8.1  | 0.27 | 19.5 | 0.455 | 12.2 | 3.1    | 0.0204 | 0.0568 | 0.0152 | 0.0123 | 2.55   | 0.0023 |
| THE-06 | 7.9  | 0.29 | 19.6 | 0.454 | 12.1 | 3.1    | 0.0223 | 0.0566 | 0.0154 | 0.0103 | 2.53   | 0.0015 |
| THE-06 | 7.6  | 0.26 | 19.5 | 0.459 | 12.3 | 3.1    | 0.0213 | 0.0584 | 0.0153 | 0.0110 | 2.52   | 0.0027 |
| TRA-01 | 12.4 | 0.16 | 0.3  | 0.246 | 24.6 | 0.0036 | 0.5741 | 0.3041 | 0.0146 | 0.0006 | 0.4858 | 0.1919 |
| TRA-01 | 14.1 | 0.16 | 0.3  | 0.245 | 24.0 | 0.0036 | 0.5692 | 0.3058 | 0.0107 | 0.0006 | 0.4699 | 0.1986 |
| TRA-01 | 11.6 | 0.16 | 0.2  | 0.238 | 24.5 | 0.0035 | 0.5740 | 0.2980 | 0.0119 | 0.0006 | 0.5181 | 0.1949 |
| VER-01 | 2.5  | 0.16 | 6.7  | 0.004 | 51.6 | 0.21   | 0.0123 | 0.0220 | 0.0005 | 0.0022 | 1.15   | 0.0025 |
| VER-01 | 2.5  | 0.18 | 6.6  | 0.004 | 50.9 | 0.24   | 0.0138 | 0.0223 | 0.0006 | 0.0012 | 1.12   | 0.0015 |
| VER-01 | 2.5  | 0.18 | 6.7  | 0.020 | 50.2 | 0.21   | 0.0123 | 0.0222 | 0.0006 | 0.0010 | 0.9430 | 0.0016 |

Values expressed as percentage. Figures in italics indicate concentrations below the limit of detection calculated multiplying the equipment detection limit by 0.6 [106]. Key: ALB: Albas; BEY: Beyssac; BOU: Bouzic; CAU: Causse; CAV: Cave; LOU: Loup; SAL: Sals; SAR: Sarlat; TEY: Teyjat; THE: Theil; TRA: Tranchecouyère; VER: Verdier.

**Table J. Results of SEM-EDS analyses of the geological samples**

| Piece  | Analysed feature                                                    | N | Grain size (µm)        | Semi-quantitative EDX analyses (*) |                               |                        | Interpretation                                                                            |
|--------|---------------------------------------------------------------------|---|------------------------|------------------------------------|-------------------------------|------------------------|-------------------------------------------------------------------------------------------|
|        |                                                                     |   |                        | >10%                               | 1-10%                         | <1%                    |                                                                                           |
| ALB-02 | White acicular crystals randomly distributed                        | 3 | Sub-microm.            | Mn, Ba                             | (Fe, Ca, Si, Al)              | (Mg, K)                | Complex Ba-rich manganese compound + (calcium carbonate + alumino-silicates)              |
|        | White acicular crystals randomly distributed over stacked platelets | 1 | Sub-microm.            | Mn, Ba                             | (Ca, Fe, Si, Al)              | (K, Mg, Na)            | Complex Ba-rich manganese compound + (calcium carbonate + alumino-silicates)              |
|        | Dark grey reg. fac. cryst.                                          | 2 | 12.7                   | Ca                                 | (Mn, Si, Ba, Al)              | (K, Mg)                | Calcium carbonate + (complex Ba-rich manganese compound + alumino-silicates)              |
| ALB-03 | White agglomerate of stacked chips                                  | 3 | Microm. to sub-microm. | Mn, (Ca)                           | Ba, (K, Al, Si)               | (Fe), Cl, Na, (Mg)     | Complex Ba-rich manganese compound + chlorides + (calcium carbonate + alumino-silicates)  |
|        | Dark grey blocky crystals                                           | 3 | 42.5                   | Ca                                 | (Mn, Si, Al)                  | (K, Mg)                | Calcium carbonate + (Mn-rich compound + alumino-silicates)                                |
| BEY-01 | White agglomerates composed of irreg. fac. cryst.                   | 3 | -                      | Mn, Ba                             | (Ca)                          | (Si, Al, Na, S, Mg, K) | Complex Ba-rich manganese compound + (alumino-silicates + calcium carbonate + sulphates)  |
|        | Light grey lath-like crystals                                       | 3 | 12                     | Mn                                 | Ba, (Ca)                      | (Si, Al, Na)           | Complex Ba-rich manganese compound + (alumino-silicates + calcium carbonate)              |
|        | White agglom. composed of irreg. fac. cryst. and acicular cryst.    | 3 | Submicr.               | Mn                                 | Ba, (Ca)                      | (Si, Al, Na, Mg, K, P) | Complex Ba-rich manganese compound + (alumino-silicates + calcium carbonate)              |
|        | Grey blocky crystals                                                | 3 | ≤50                    | Ca, (Mn)                           | (Ba)                          | (Si, Al, P)            | Calcium carbonate + (complex Ba-rich manganese compound + alumino-silicates + phosphates) |
| BOU-03 | Light grey agglomerate of subcircular irreg. fac. cryst.            | 3 | 2.6                    | Mn, Fe                             | (Si, Al, Ca, Mg)              | (K)                    | Mn/Fe-rich compound + (alumino-silicates)                                                 |
|        | Compact agglomerate of stacked platelets                            | 1 | 4.5                    | Fe, Si                             | Al, Mn                        | K, Ca, Mg              | Fe-rich alumino-silicate with traces of Mn                                                |
| BOU-04 | Stacked light grey platelets with tiny irreg. fac. white crystals   | 3 | 5.7                    | Si, Al                             | Fe, Mn, Ca, Mg                | Ti                     | Fe/Mn-rich alumino-silicate + Ti-rich compound                                            |
|        | White irreg. fac. cryst.                                            | 1 | 5                      | Ce                                 | Si, La, P, Th, Nd, Al, Fe, Ca | K, Mg                  | Ce/La/Th/Nd/Ca-rich silicate with phosphate + (alumino-silicates)                         |
|        | Light grey irreg. fac. cryst. over stacked platelets                | 1 | 0.8                    | Fe, Si, Al                         | Ca, K, Mg                     | Mn, Ti                 | Ti-rich compound + Fe-rich alumino-silicate with traces of Mn                             |
|        | Light grey irreg. fac. cryst. over stacked platelets                | 1 | 0.5                    | Si, Ti, Al                         | Fe, Ca, K, Mg                 | Mn                     | Ti-rich compound + Fe-rich alumino-silicate with traces of Mn                             |
|        | Grey irreg. fac. cryst.                                             | 2 | 44                     | Ca, Mg                             | (Si, Al, Fe, Mn)              | (K, Ti)                | Ca/Mg-rich carbonate + (Fe/Mn-rich alumino-silicate + Mn/Ti-rich compound)                |
|        | Agglomerates of light grey poorly crystallized rounded particles    | 3 | 3.1                    | Si, Mn, Al                         | Fe, Ca, K, Mg                 | (Ti), Na               | Mn/Fe-rich alumino-silicate + (Ti-rich compound)                                          |
| BOU-06 | Agglomerate of white acicular crystals                              | 1 | Sub-microm.            | Mn                                 | (Fe), Ba, (Si), Ca, (Al)      | (Mg, K)                | Complex Ca/Ba-rich manganese compound(s) + (Fe-rich alumino-silicate)                     |
|        | Light grey gel-like mass                                            | 1 | -                      | Fe                                 | (Mn), Si, Al,                 | Mg, (P), (Ca), (Ba), K | Fe-rich alumino-silicate + (complex Ca/Ba-rich manganese compound + phosphates)           |
|        | Agglomerate of grey reg. fac. cryst.                                | 1 | 1.5                    | Mn, (Fe)                           | (Si, Al)                      | Ba, Ca, (Mg, K, P)     | Complex Ca/Ba-rich manganese compound(s) + (Fe-rich alumino-silicate + phosphates)        |

| Piece  | Analysed feature                                                        | N | Grain size (µm) | Semi-quantitative EDX analyses (*) |                 |                            | Interpretation                                                                                                    |
|--------|-------------------------------------------------------------------------|---|-----------------|------------------------------------|-----------------|----------------------------|-------------------------------------------------------------------------------------------------------------------|
|        |                                                                         |   |                 | >10%                               | 1-10%           | <1%                        |                                                                                                                   |
|        | Stacked light grey chips                                                | 1 | Microm.         | <b>Mn</b>                          | (Fe, Si, Al)    | Ca, (K), Ba, (Mg, P)       | Complex Ca/Ba-rich manganese compound(s) + (Fe-rich alumino-silicate + phosphates)                                |
|        | Stacked light grey platelets                                            | 1 | 2               | Si, Al, Fe                         | (Mn), K, Mg     | (Ca, Ba)                   | Fe-rich alumino-silicate + (complex Ca/Ba-rich manganese compound)                                                |
| CAU-01 | Grey blocky crystals                                                    | 3 | 350             | Ca (Mn)                            | (Ba)            | (Si, Al, Fe, Mg, K, P, Na) | Calcium carbonate + (silicate/alumino-silicate + complex Ba-rich manganese compound + iron oxide + phosphates)    |
|        | White platelets and acicular crystals                                   | 3 | 5               | Mn, (Ca)                           | Ba              | (Si, Mg, Al, K, P, Na)     | Complex Ba-rich manganese compound + (silicates/alumino-silicates + calcium carbonate + phosphates)               |
| CAV-01 | White amorphous mass                                                    | 2 | -               | <b>Mn, Ca</b>                      | (Si), P, (Al)   | (K, S, Na, Mg)             | Complex manganese phosphate compound + (silicates/alumino-silicates + sulphates)                                  |
|        | White spherical agglomerate composed of irregular grains                | 1 | -               | <b>Fe, Mn</b>                      | Si, Ca, Al      | P, K, Mg, Ti, Na, S        | Complex ferroan-manganese compound + silicates/alumino-silicates, phosphates, sulphates                           |
|        | Grey fibrous/laminated crystals                                         | 3 | -               | Si, K, Al                          | (Mn), Ca        | Fe, (P), Na, Mg            | K-rich silicate                                                                                                   |
|        | White gel-like mass at the surface / white spongy-like structure inside | 3 | -               | Mn, Si                             | Al, Ca, Fe, K   | Mg, Na, (P)                | Complex manganese silicate compound                                                                               |
| LOU-01 | White botryoidal agglomerates                                           | 4 | -               | <b>Mn</b>                          | Ca, Al, Si, Zn  | K, Na, P, Mg, S            | Complex manganese compound                                                                                        |
|        | White amorphous mass - cracked surface                                  | 3 | -               | Mn                                 | Ca, Al, Si, Zn  | K, Fe, P, Na, Mg           | Complex manganese compound                                                                                        |
| SAL-01 | Grey blocky crystals                                                    | 4 | 350             | <b>Ca, (Mn)</b>                    | (Ba)            | (K, Mg, Al, Si, P, Na, S)  | Calcium carbonate + (complex Ba/K-rich manganese compound + silicates/alumino-silicates + phosphates + sulphates) |
|        | White acicular crystals displayed in a dendritic pattern                | 3 | 5               | <b>Mn</b>                          | Ba, (Ca, Sr), K | (Al, Mg, Si)               | Complex Ba/K-rich manganese compound + (silicates/alumino-silicates + calcium carbonate)                          |
| SAL-02 | Grey blocky crystals                                                    | 3 | 350             | <b>Ca</b>                          | (Mn)            | (Ba, K, Si)                | Calcium carbonate + (complex Ba/K-rich manganese compound)                                                        |
|        | White poorly crystallized crystals                                      | 3 | -               | <b>Mn, (Ca)</b>                    | Ba, K           | (Al, Si, Mg)               | Complex Ba/K-rich manganese compound + (alumino-silicates + calcium carbonate)                                    |
| SAR-01 | White acicular crystals                                                 | 1 | 10              | <b>Mn</b>                          | (Si), Ba        | (Al, Ca, P)                | Complex Ba-rich manganese compound + (silicates/alumino-silicates + phosphates)                                   |
|        | Grey subcirc. grains                                                    | 1 | ≤1000           | <b>Si, (Mn)</b>                    |                 | (Al)                       | Silicate + (manganese compound)                                                                                   |
|        | White agglom. composed of pseudo-regular grains                         | 1 | <2              | <b>Mn</b>                          | (Si), Ba        | (Ca, Al)                   | Ba-rich manganese compound + (silicates/alumino-silicates)                                                        |
|        | White spongy structure                                                  | 2 | -               | <b>Mn</b>                          | Ba, (Si)        | (Al, Ca, K)                | Ba-rich manganese compound + (silicates/alumino-silicates)                                                        |
|        | White agglom. composed of poorly crystallized grains                    | 1 | -               | <b>Mn, Ba</b>                      | (Si, Al)        | (Ca, K)                    | Ba-rich manganese compound + (silicates/alumino-silicates)                                                        |
|        | White agglom. composed of acicular crystals                             | 1 | 7               | <b>Mn, Ba</b>                      | (Si)            | (Ca, Al, K)                | Ba-rich manganese compound + (silicates/alumino-silicates)                                                        |
| THE-02 | Dark grey crystal with a spongy structure                               | 3 | -               | Mn, Ca                             | Ba, Si          | Al, Fe, K, S, Mg, P        | Complex Ba-rich manganese compound                                                                                |
|        | White agglomerates composed of platelets                                | 3 | 10              | Mn, Ca, Ba                         | Si              | Al, K, Na, Mg, S, P, Cl    | Complex Ba-rich manganese compound                                                                                |

| Piece  | Analysed feature                                          | N | Grain size<br>( $\mu\text{m}$ ) | Semi-quantitative EDX analyses (*) |                       |                     | Interpretation                                                        |
|--------|-----------------------------------------------------------|---|---------------------------------|------------------------------------|-----------------------|---------------------|-----------------------------------------------------------------------|
|        |                                                           |   |                                 | >10%                               | 1-10%                 | <1%                 |                                                                       |
|        | Light grey amorphous<br>crystals - porous<br>surface      | 3 | -                               | <b>Ca</b> , (Mn)                   | (Ba)                  | (Si, Al, P, Mg)     | Calcium carbonate (complex Ba-rich<br>manganese compound)             |
| THE-03 | Grey irreg. fac. cryst.                                   | 3 | -                               | <b>Ca</b> , (Mn)                   | (Ba)                  | (Si, Al, Cl,<br>Mg) | Calcium carbonate (complex Ba-rich<br>manganese compound + chlorides) |
|        | White agglomerates<br>composed of platelets               | 3 | 10                              | <b>Mn</b> , Ba, (Ca)               |                       | (P, Si, Al)         | Complex Ba-rich manganese compound                                    |
| THE-06 | White flower-like<br>agglomerate<br>composed of platelets | 3 | 15                              | Ba, (Fe, Si)                       | (Al, Ca, Mn,<br>S, K) | (Mg, Na)            | Ba-rich compound                                                      |
|        | Dark grey irreg. fac.<br>cryst.                           | 2 | 60                              | Ca, Fe                             | Mn, Si, Al, Ba        | K, Mg, S            | Undetermined                                                          |
|        | Platelets randomly<br>distributed                         | 4 | 2                               | <b>Mn</b> , Ba                     | (Fe, Si, Al,<br>Ca)   | (S, K, Mg,<br>Na)   | Complex Ba-rich manganese compound                                    |
| VER-01 | White spheres with a<br>spongy-like structure             | 3 | 1 - 60                          | <b>Mn</b>                          | Ca, Ba                | K, (Si)             | Complex Ca/Ba/K-rich manganese<br>compounds + (silicates)             |

N: number of analysed features. (\*) Weight percentages including O, normalized to 100%. 'White' and 'Grey' refer to the contrast observed on backscattered electron (BSE) images. Elements in bold police refer to those which present a concentration over the 40%. Elements and compounds in brackets refer to those which do not account for the elemental/mineralogical composition of the analyzed item. Reg. or irreg. fac. cryst.: regular or irregular faceted crystal; Microm: micrometric.
