# Supplementary material for: Provenance, modification and use of manganese-rich rocks at Le Moustier (Dordogne, France)
Source: PubMed Central journal article supplement (PMC6636720; doi:10.1371/journal.pone.0218568), 2019-07-17
Supplement: pone.0218568.s002.pdf [file pone.0218568.s002.pdf]

# Provenance, modification and use of manganese-rich rocks at Le Moustier (Dordogne, France)

Africa Pitarch Martí\*, Francesco d'Errico, Alain Turq, Eric Lebraud, Emmanuel Discamps, Brad Gravina

\*Corresponding Author:

E-mail: [africa.pitarch@gmail.com](mailto:africa.pitarch@gmail.com) (APM)

## S1 Figures

### **Additional information on the EDXRF calibration, the archaeological Mn-rich lumps from Le Moustier and the Mn-rich geological samples collected at the Dordogne and Lot regions of France**

|                                                                               |    |
|-------------------------------------------------------------------------------|----|
| Figure A. Plan and stratigraphy of Le Moustier.....                           | 2  |
| Figure B. EDXRF calibration curves.....                                       | 3  |
| Figure C. Modifications on MOU-MNP-L&R-H7.....                                | 4  |
| Figure D. Modifications on MOU-MNP -L&R -08.....                              | 5  |
| Figure E. Modifications on MOU-G&D-6857.....                                  | 6  |
| Figure F. Dimensions vs. number of facets.....                                | 7  |
| Figure G. Mn/Si ration vs. length and weight.....                             | 8  |
| Figure H. Mn/Si ration vs. type of modification and number of facets.....     | 9  |
| Figure I. Ternary plots of selected elements from the geological samples..... | 10 |

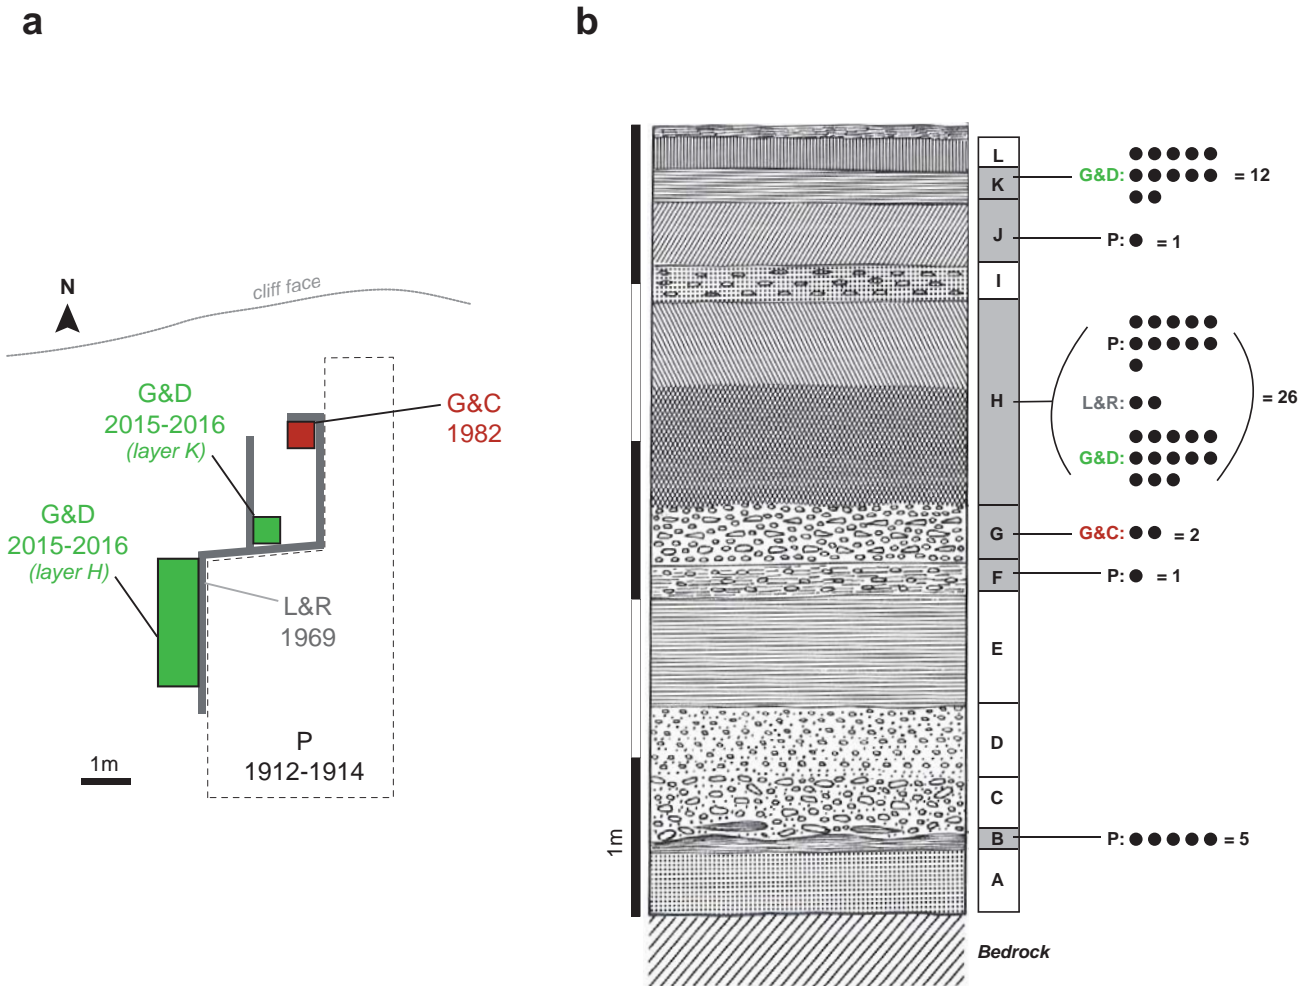

**Figure A. Plan and stratigraphy of Le Moustier.** a) Plan of the Le Moustier Lower Shelter indicating the area excavated by Peyrony (P, dashed lines), the section cleaned by Laville and Rigaud (L&R; light grey solid lines), the test-pit of Geneste and Chadelle (G&Ch, red square), and the recent excavations conducted by Gravina and Discamps (G&D; green squares); b) Peyrony's stratigraphy with the distribution of Mn-rich fragments (dots).

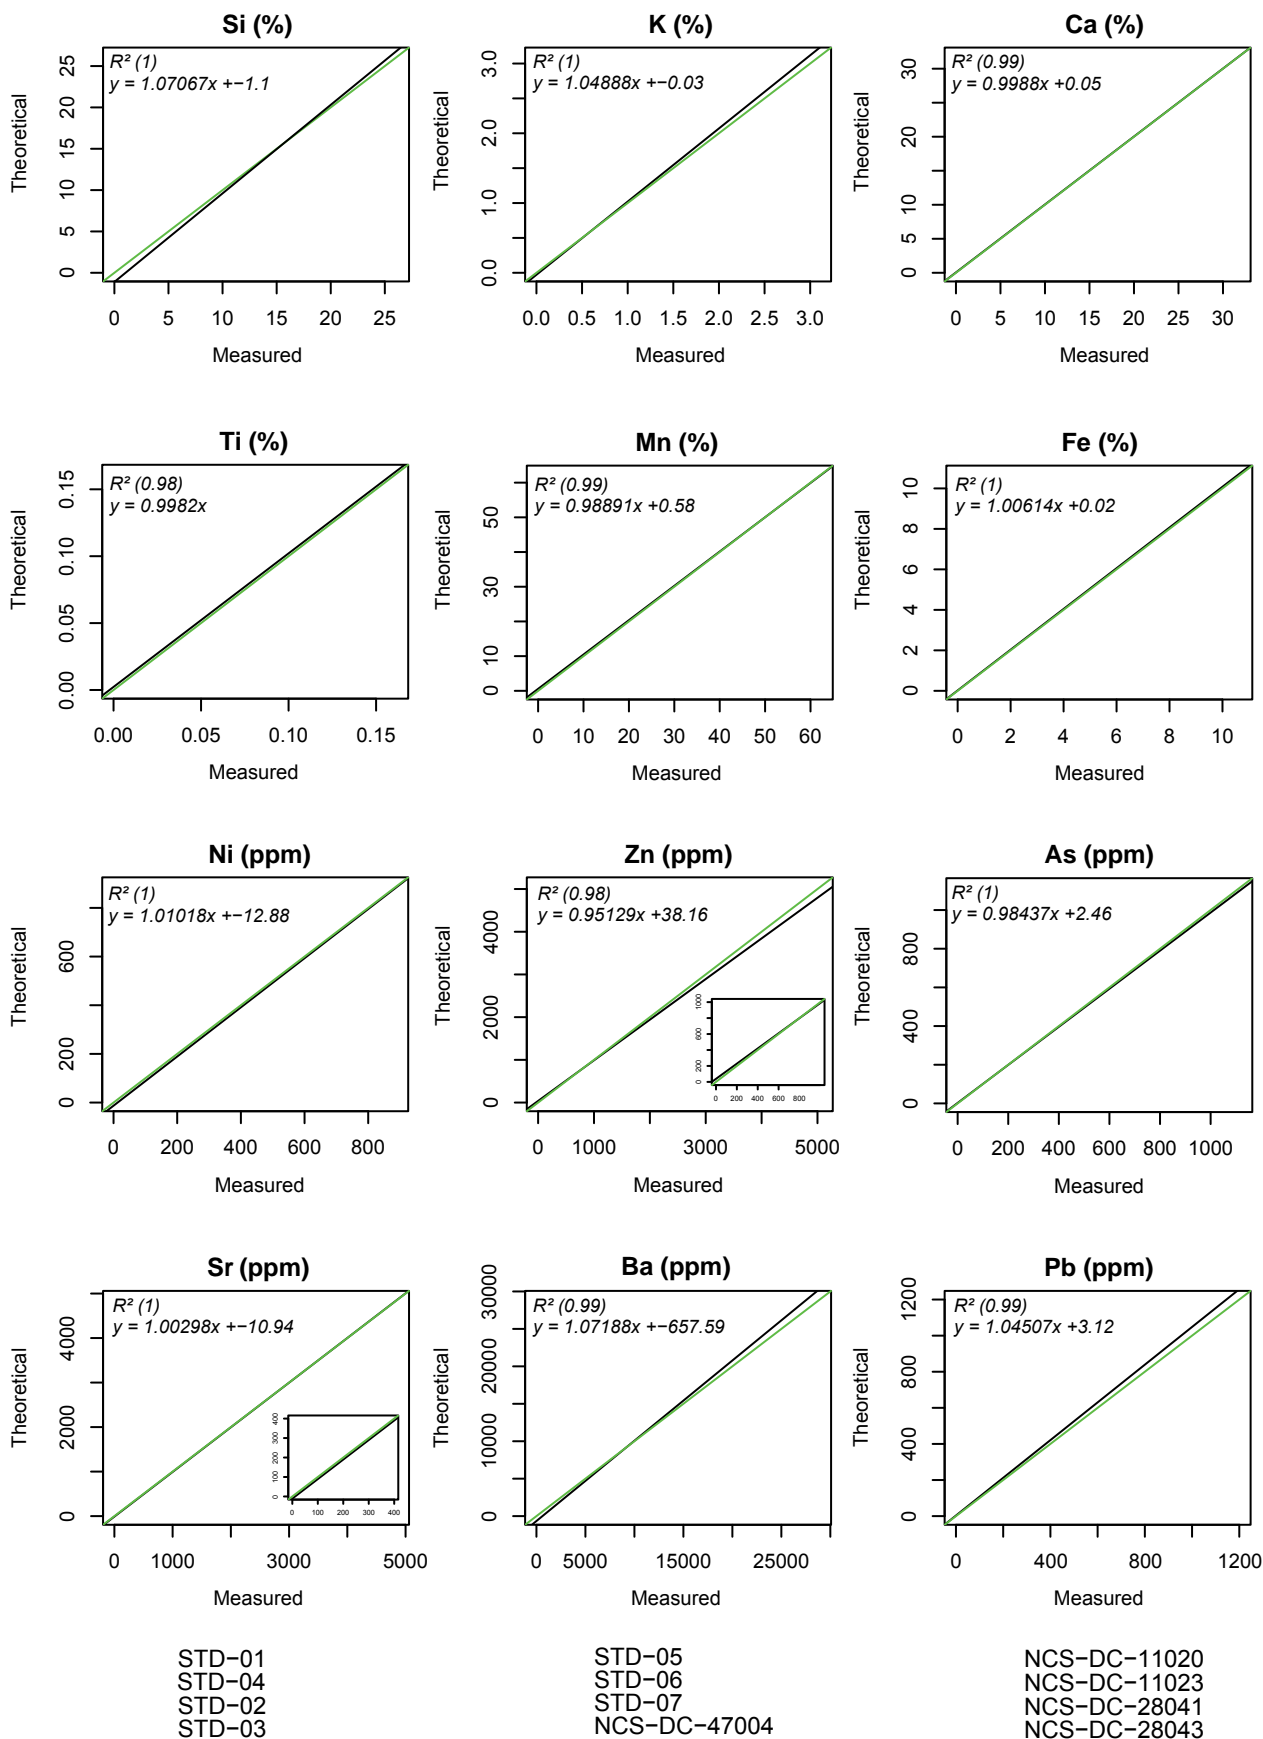

**Figure B. EDXRF calibration curves.** Calibration curves for the twelve elements analysed by EDXRF in this study.

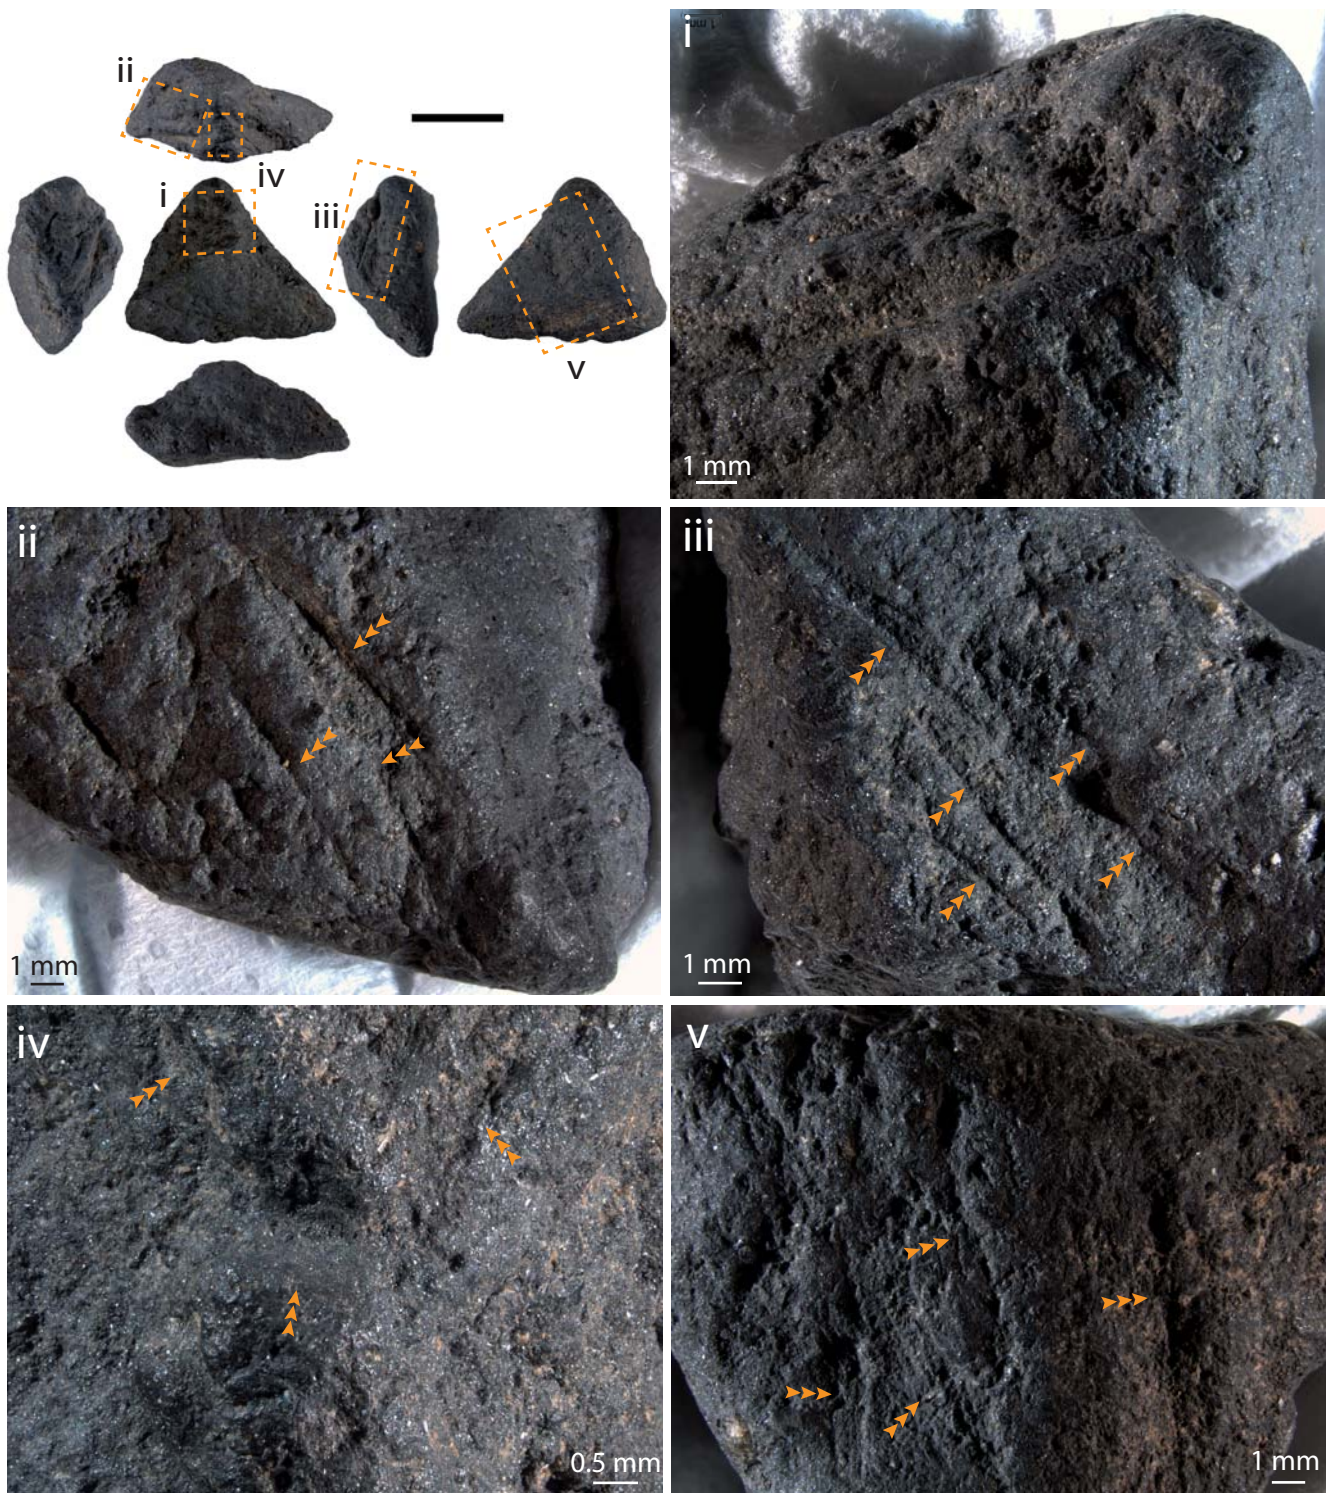

**Figure C. Modifications on MOU-MNP-L&R-H7.** Anthropogenic modifications recorded on the sample.

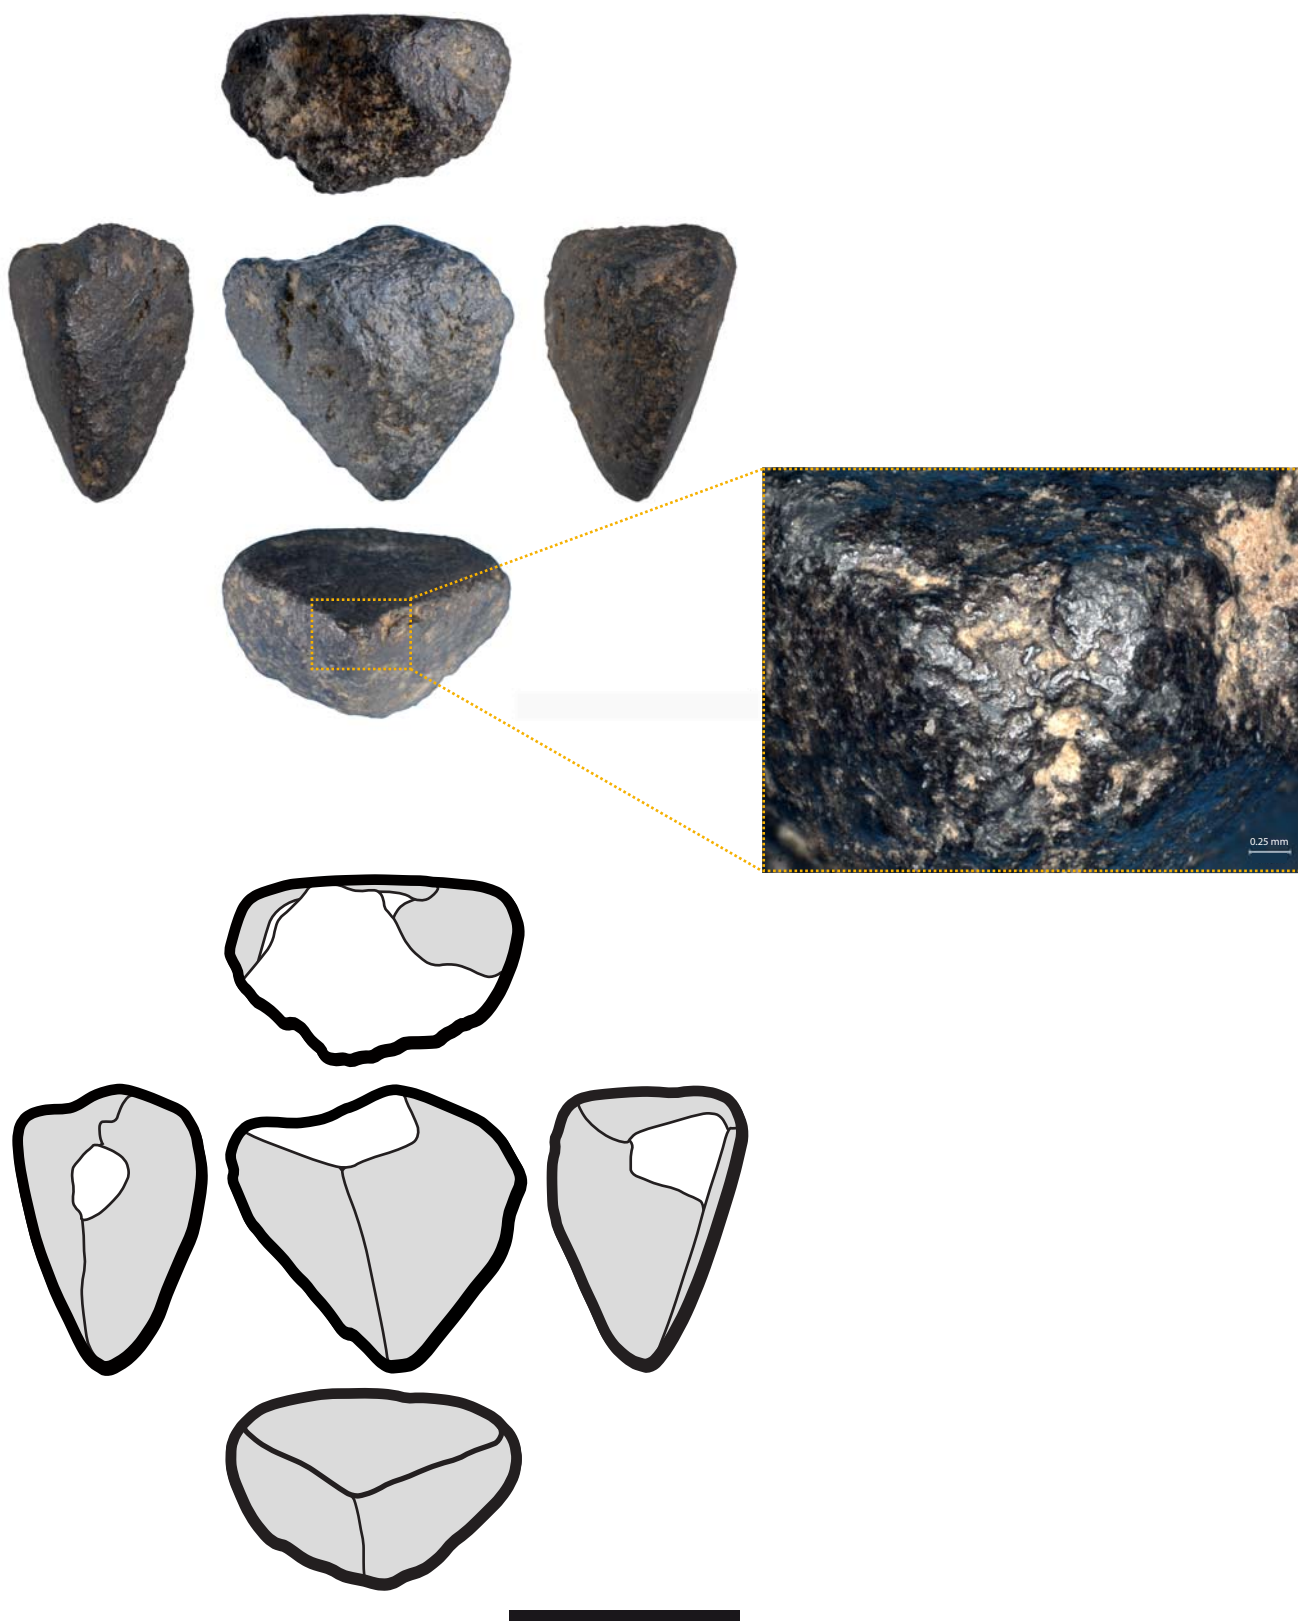

**Figure D. Modifications on MOU-MNP -L&R -08.** a) Photo of the object; b) tracing of the sample indicating ground facets (gray) and flake scars (white); c) photo of the tip bearing a polish.

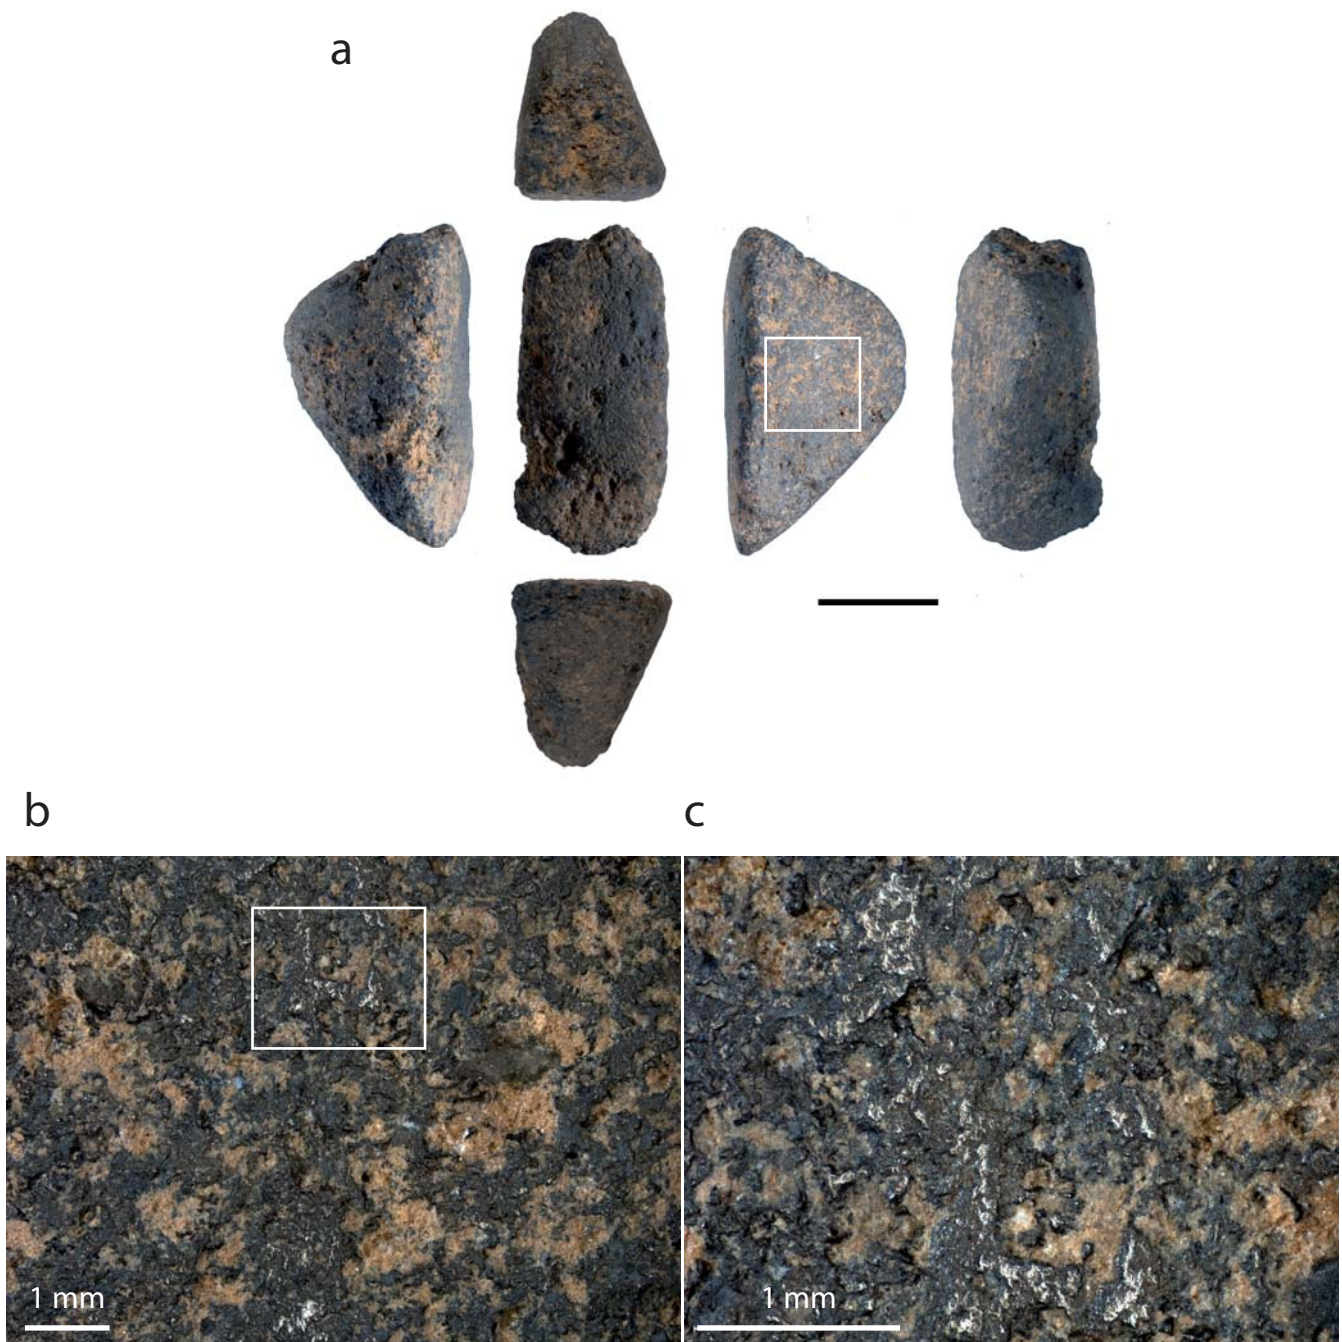

**Figure E. Modifications on MOU-G&D-6857.** Anthropogenic modifications recorded on the sample.

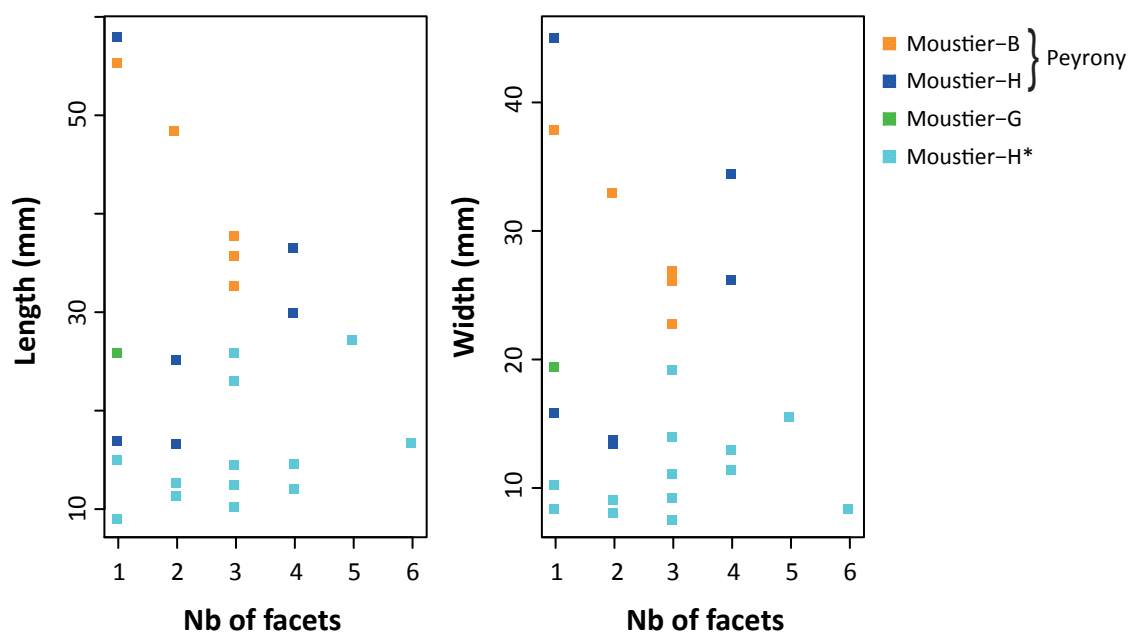

**Figure F. Dimensions vs. number of facets.** Size of modified manganese pieces by number of facets. Colours indicate the layer of provenance.

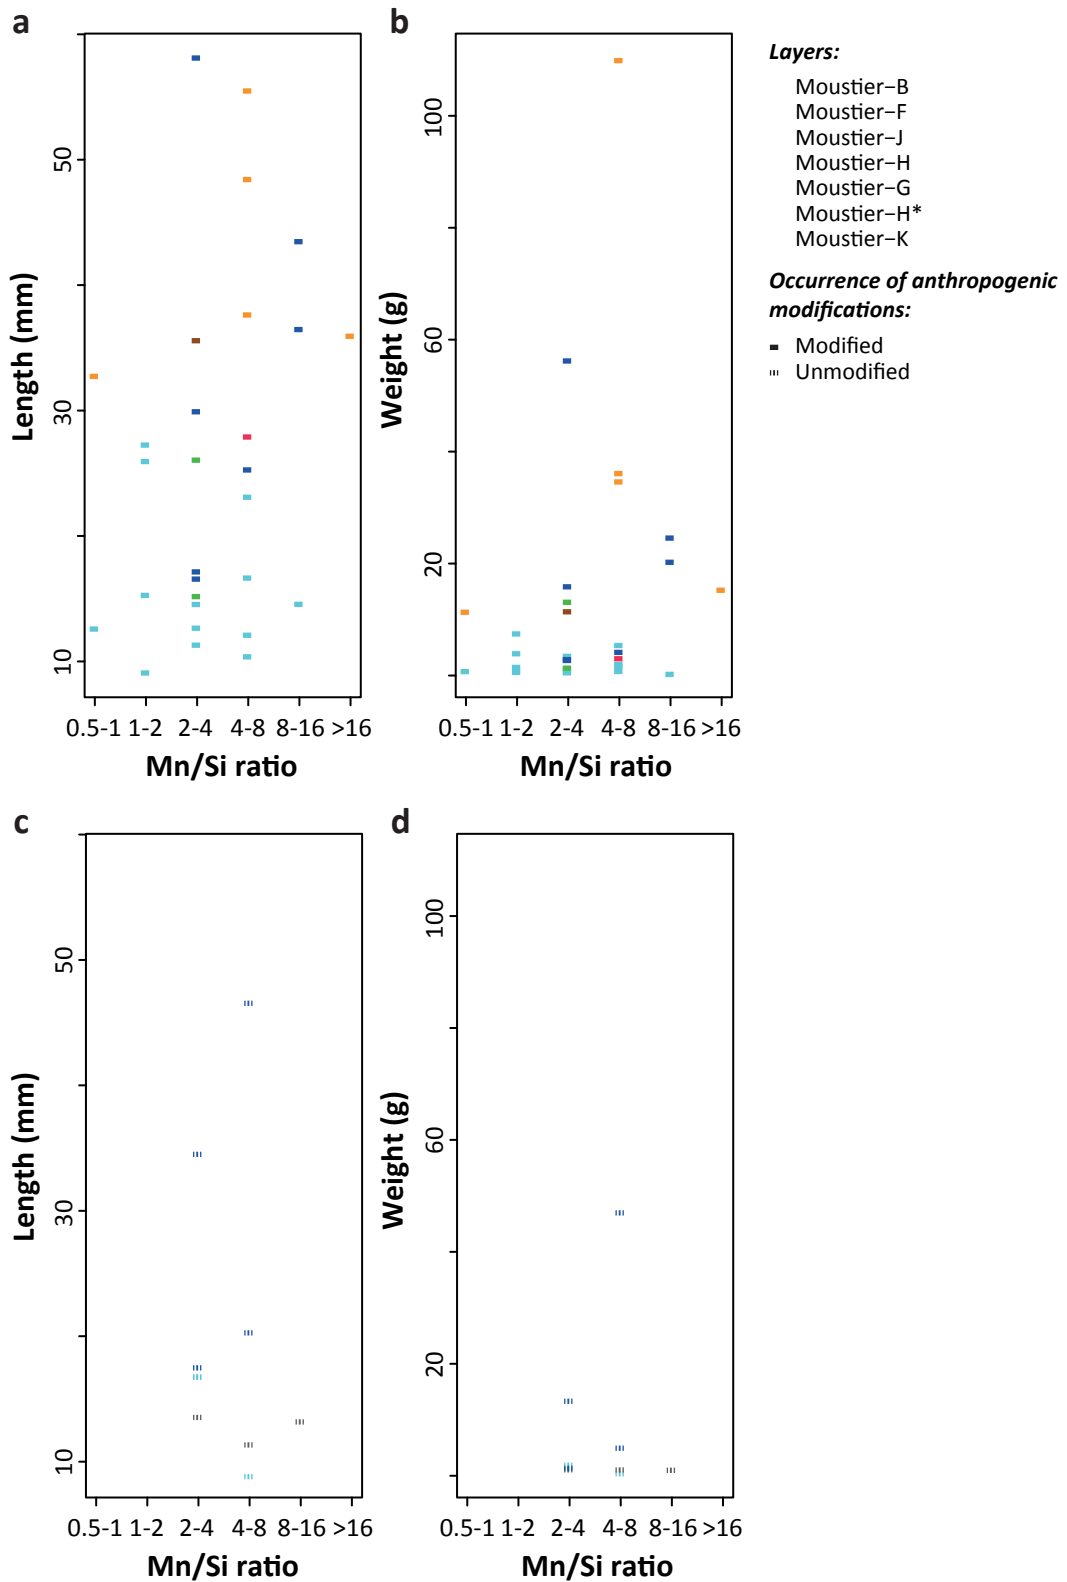

**Figure G. Mn/Si ratio vs. length and weight.** Mn/Si ratio of modified and unmodified manganese pieces from Le Moustier by length and weight. Colours indicate the layer of provenance.



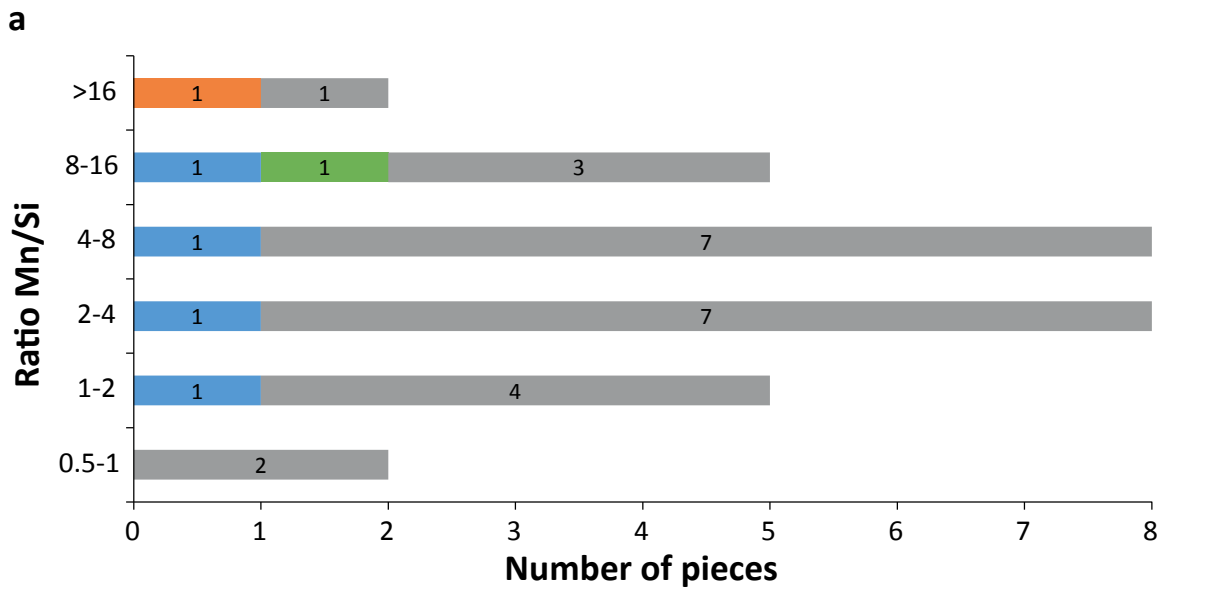

**Type of modification:** ■ Percussion marks ■ With scr. striation ■ With abr. striation ■ With incisions

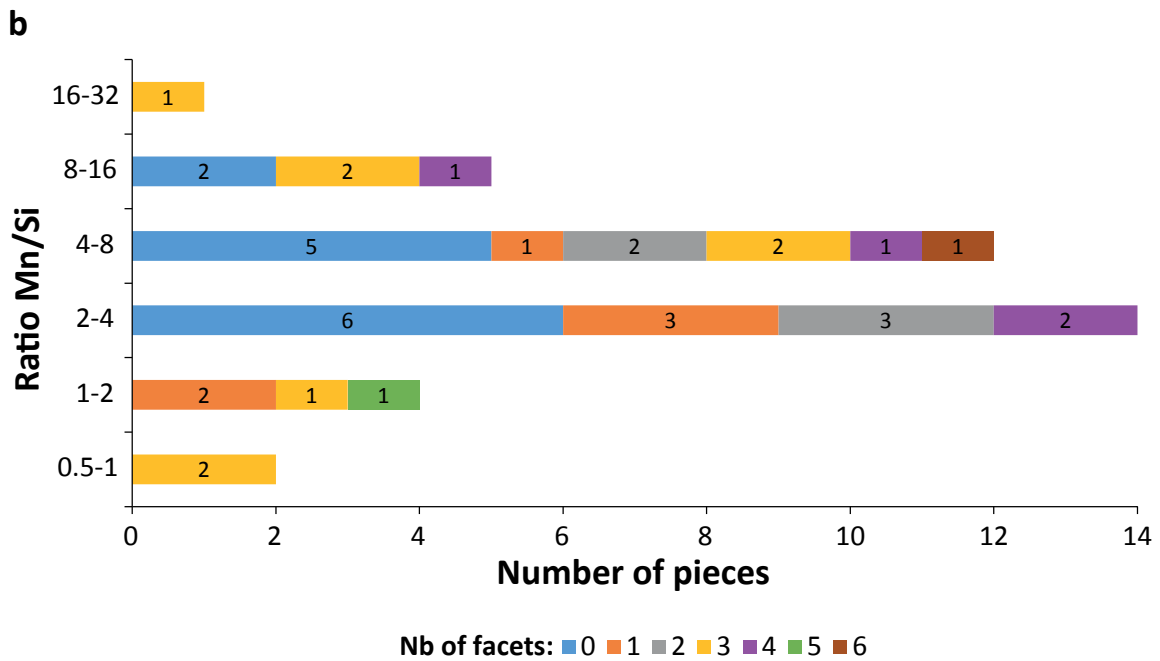

**Figure H. Mn/Si ratio vs. type of modification and number of facets.** Mn/Si ratio of modified archaeological lumps by modification type (a) and number of facets (b).

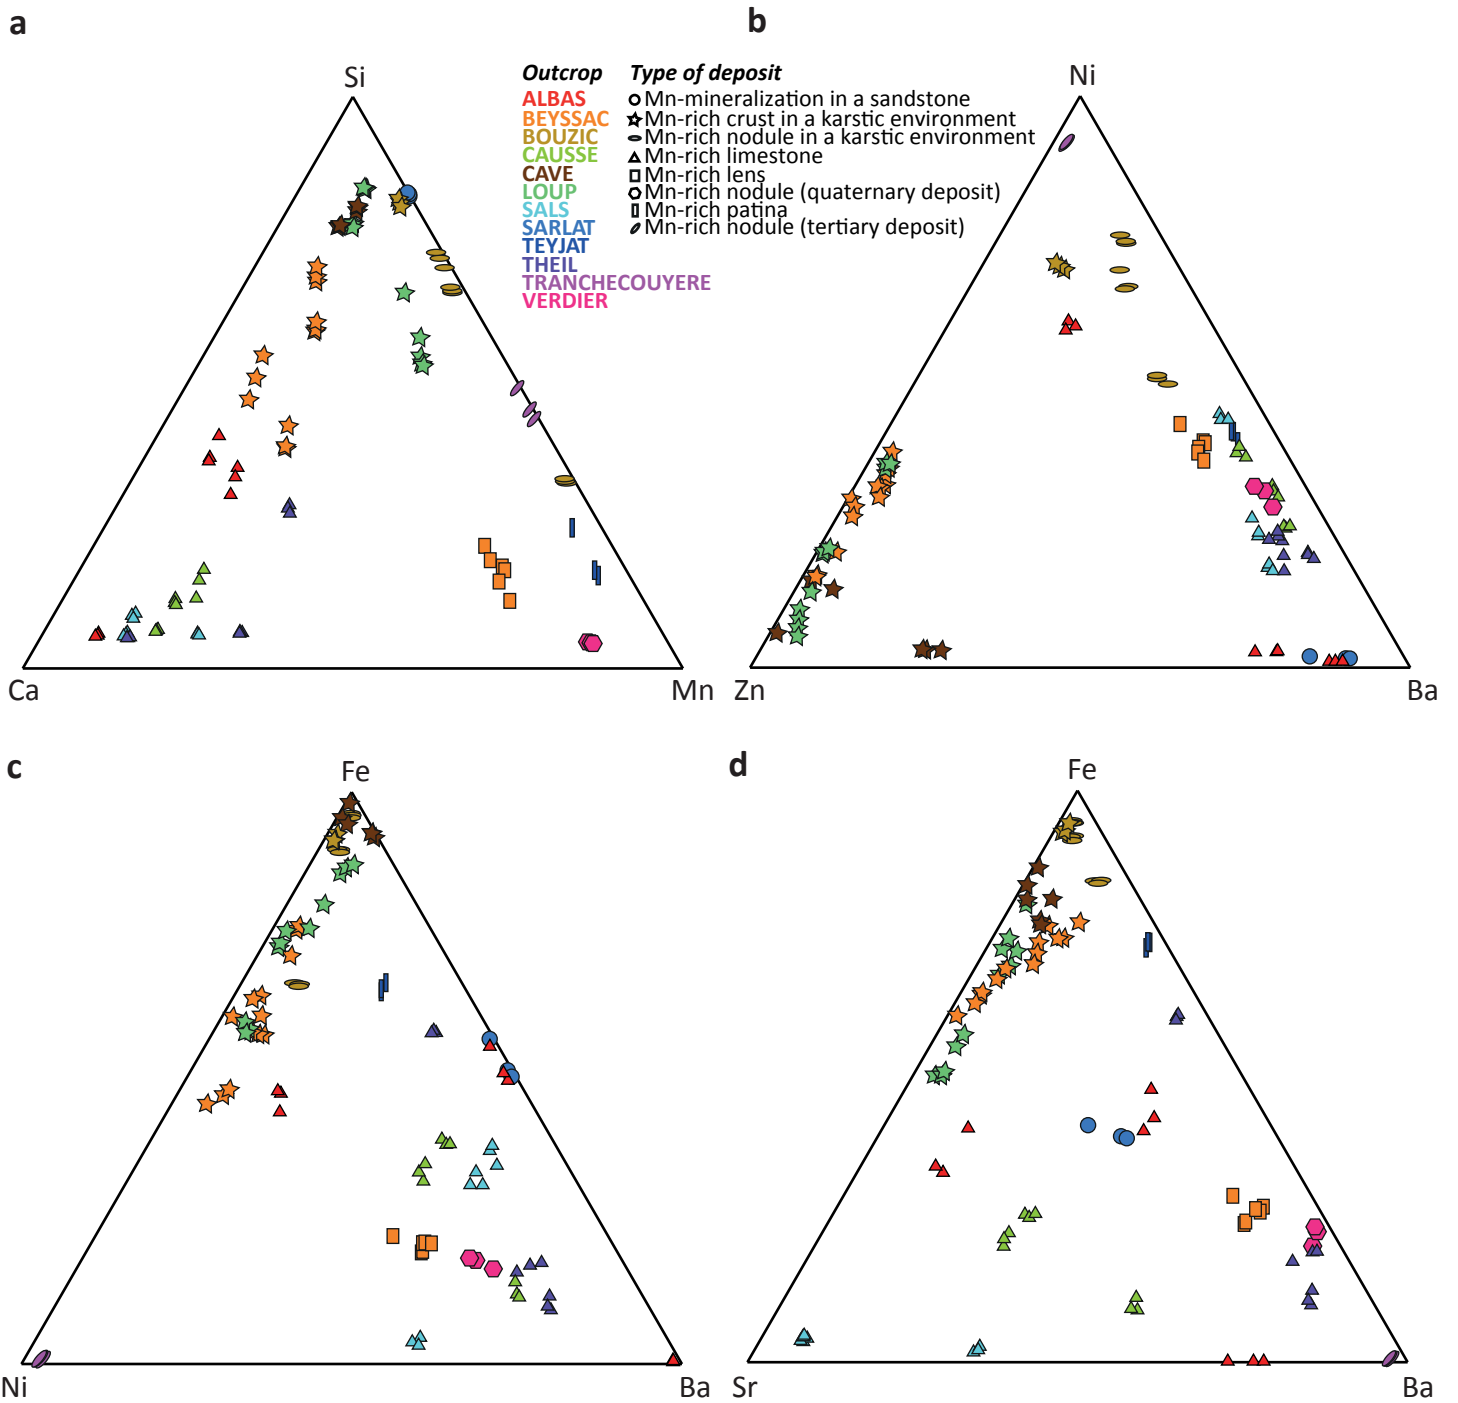

**Figure I. Ternary plots of selected elements detected the geological samples.** Ternary diagrams showing the composition of geological samples for (a) Ca-Si-Mn; (b) Zn, Ni, Ba; (c) Ni, Fe, Ba; (d) Sr, Fe, Ba. Data perturbation: (a) none, (b) 5-40-1, (c) 30-1-1, and 30-1-1 (d). Outcrops and type of deposits are indicated with different colours and symbols.
