# Supplementary material for: Provenance, modification and use of manganese-rich rocks at Le Moustier (Dordogne, France)
Source: PubMed Central journal article supplement (PMC6636720; doi:10.1371/journal.pone.0218568), 2019-07-17
Supplement: pone.0218568.s004.pdf [file pone.0218568.s004.pdf]

# Provenance, modification and use of manganese-rich rocks at Le Moustier, Dordogne, France

Africa Pitarch Martí\*, Francesco d'Errico, Alain Turq, Eric Lebraud, Emmanuel Discamps, Brad Gravina.

\*Corresponding Author

E-mail: africa.pitarch@gmail.com (APM)

## S3 Figures

### Results of analyses conducted on Mn-rich geological samples from Dordogne and Lot regions of France

|                                                                                                                           |       |
|---------------------------------------------------------------------------------------------------------------------------|-------|
| Figure A. Back-scattered electron images of representative areas from the geological samples collected in this study..... | 2     |
| Figures B and C. Results of analyses conducted on samples from <i>Mine d'Albas</i> .....                                  | 3-4   |
| Figure D. Results of analyses conducted on samples from <i>Mine de Causse du Cluzel</i> .....                             | 5     |
| Figures E and F. Results of analyses conducted on samples from <i>Mine de Sals</i> .....                                  | 6-7   |
| Figures G, H and I. Results of analyses conducted on samples from <i>Mine de Le Theil</i> .....                           | 8-10  |
| Figure J. Results of analyses conducted on samples from <i>Grotte-Cave</i> .....                                          | 11    |
| Figure K. Results of analyses conducted on samples from <i>Grotte du Loup</i> .....                                       | 12    |
| Figure L. Results of analyses conducted on samples from <i>Grotte de Beyssac</i> .....                                    | 13    |
| Figures M, N and O. Results of analyses conducted on samples from <i>Grotte du Trou du Vent</i> .....                     | 14-16 |
| Figure P. Results of analyses conducted on samples from <i>Sarlat</i> .....                                               | 17    |
| Figure Q. Results of analyses conducted on samples from <i>Carrière Le Verdier</i> .....                                  | 18    |
| Figure R. Results of analyses conducted on samples from <i>Teyjat</i> .....                                               | 19    |
| Figure S. Results of analyses conducted on samples from <i>Tranchecouyère</i> .....                                       | 20    |

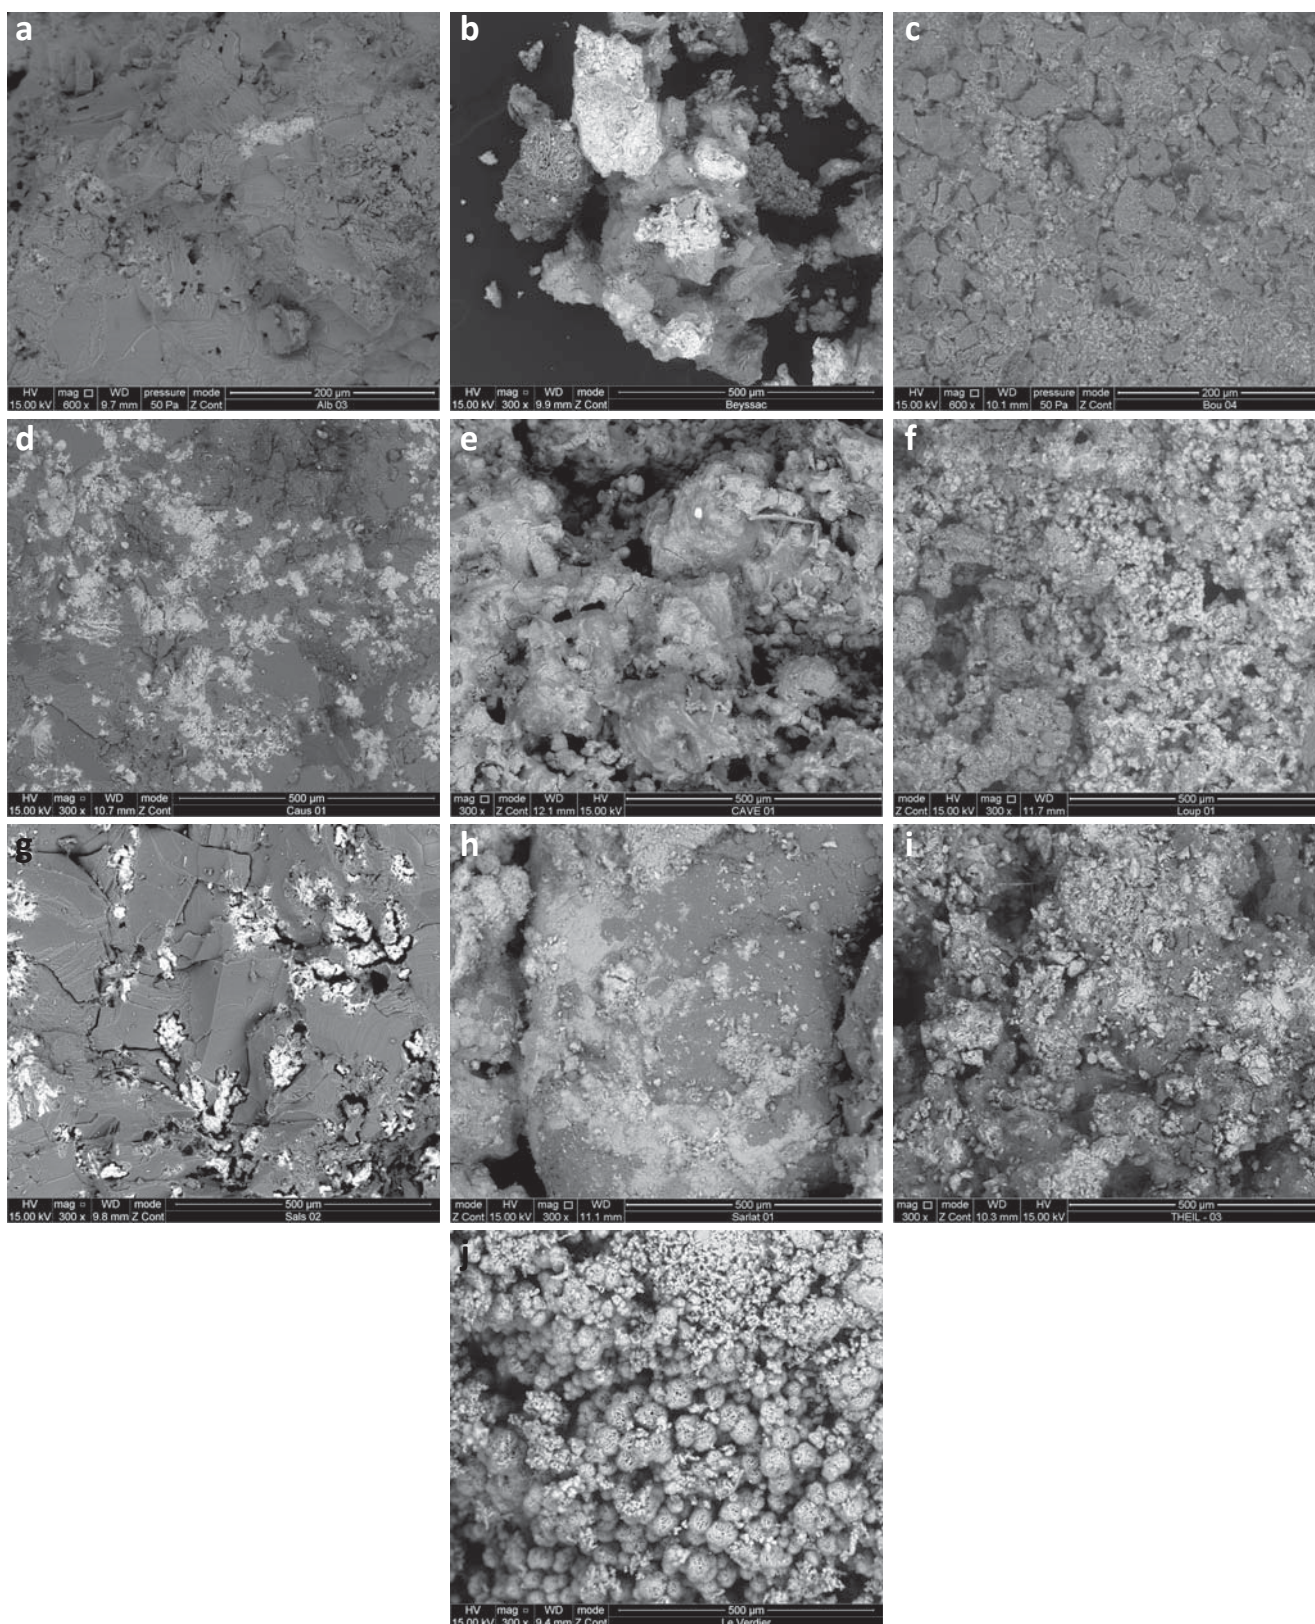

**Figure A.** SEM images in back-scattered electron mode of selected geological samples; a: *Mine d'Albas* (ALB-03); b: *Grotte de Beys-sac* (BEY-01); c: *Grotte du Trou du Vent* (BOU-04); d: *Mine de Causse du Cluzel* (CAU-01); e: *Grotte-Cave* (CAV-01); f: *Grotte du Loup* (LOU-01); g: *Mine de Sals* (SAL-02); h: *Sarlats* (SAR-01); i: *Mine de Le Theil* (THE-03); j: *Carrière Le Verdier* (VER-01).

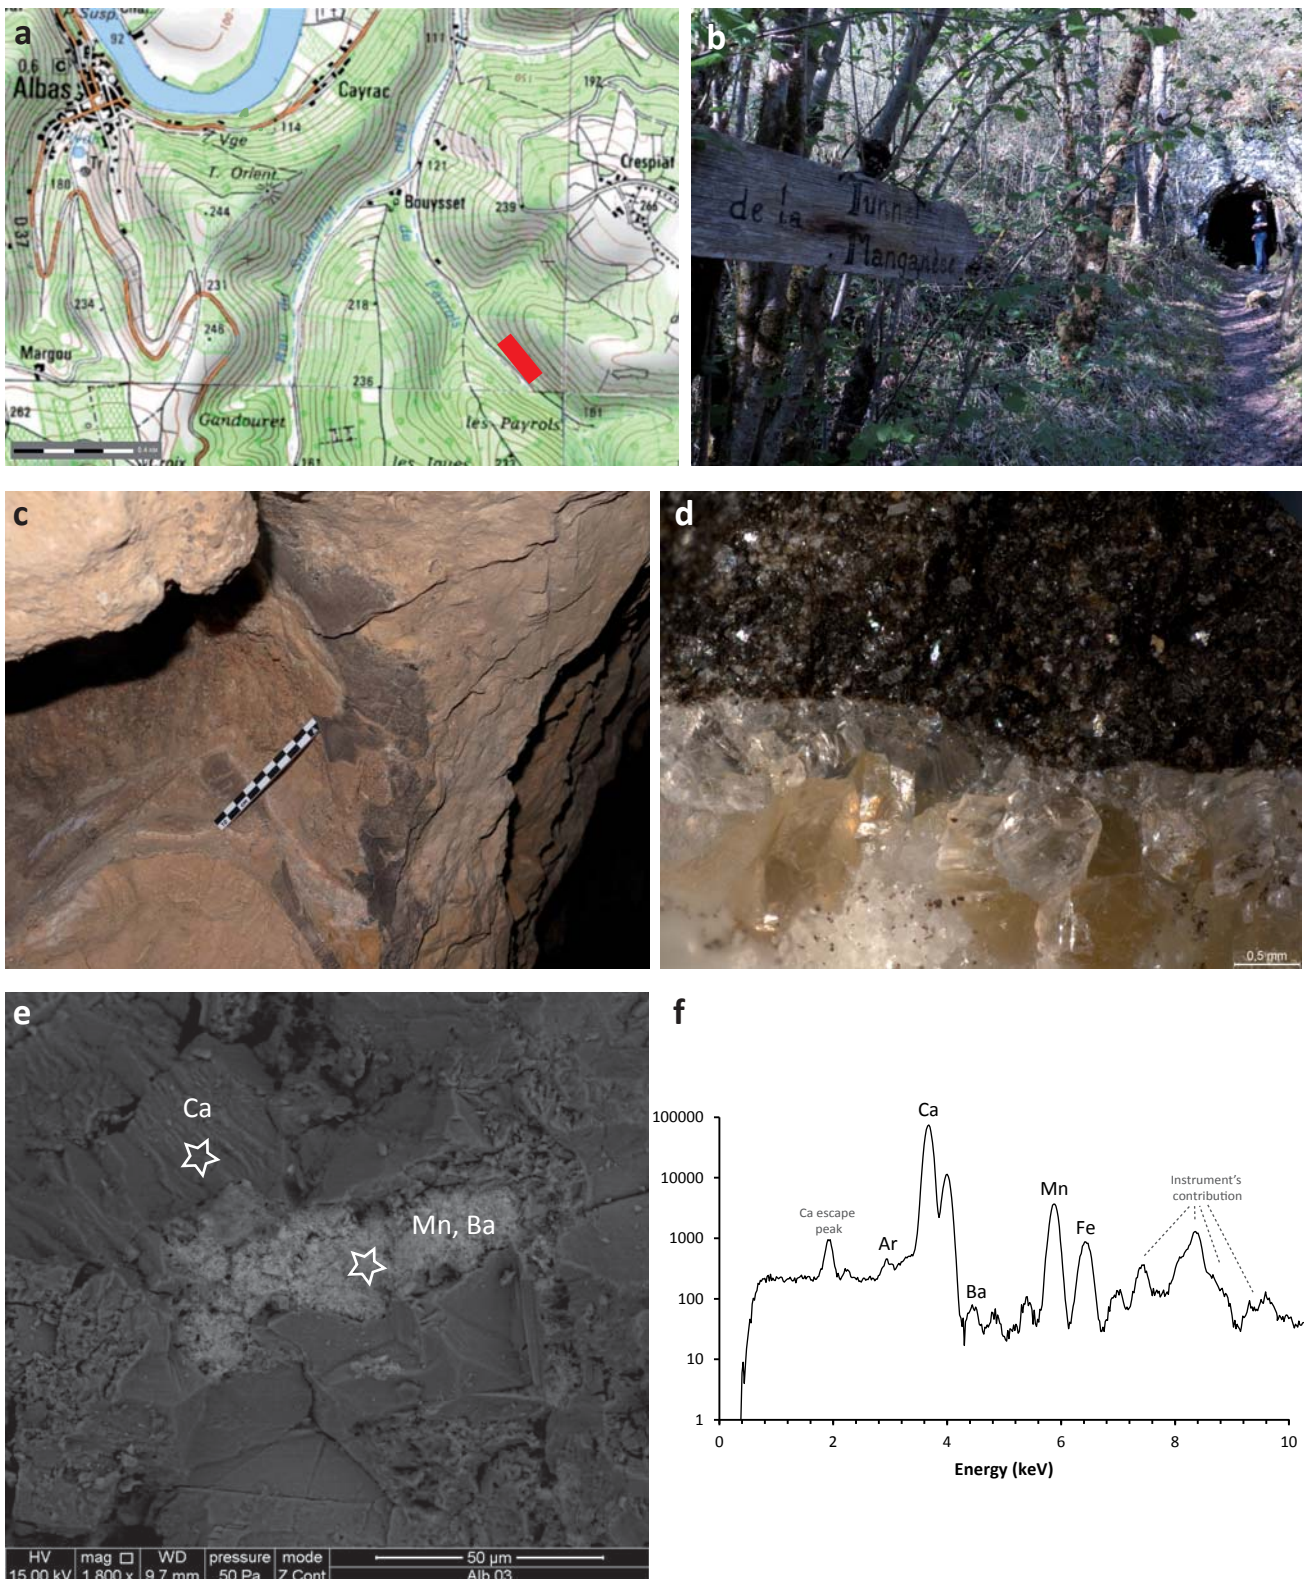

**Figure B. Results of analyses conducted on samples from *Mine d'Albas*.** a: location of the outcrop (in red); b: view of the entrance of the tunnel (@C. Magarzo); c: photo of the sampled area; d: macro photo of the surface of the sample ALB-03; e: SEM image in BSE mode; f: EDXRF obtained from pulverized sample.

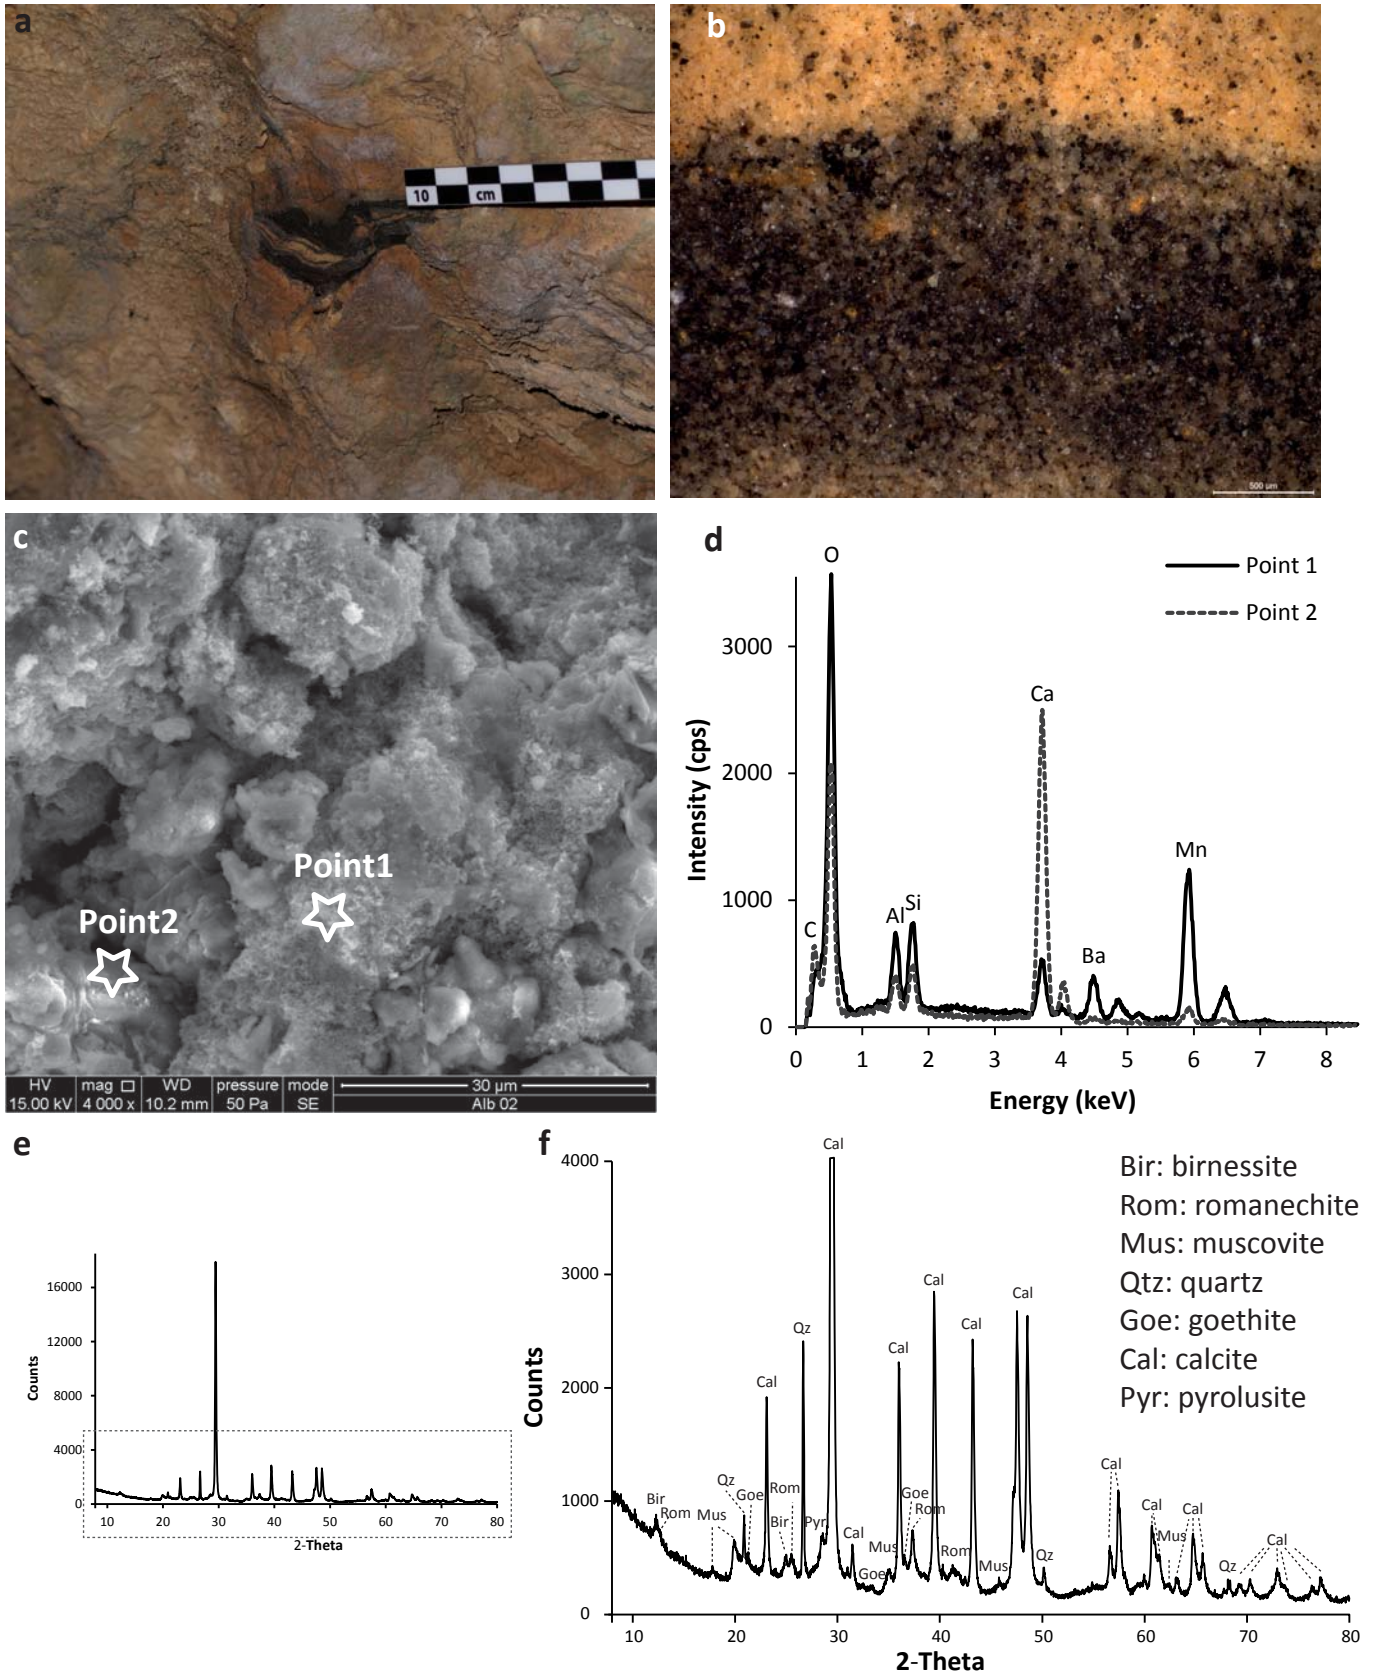

**Figure C. Results of analyses conducted on samples from *Mine d'Albas*.** a: photo of the sampled area (@C. Magarzo); b: macro photo of the surface of sample ALB-02; c: SEM image in SE mode of sample ALB-02 (stars indicate analysed spots); d: EDS spectra of spots 1 and 2 indicated in c; e, f: X-ray diffractogram obtained from pulverized sample ALB-01.

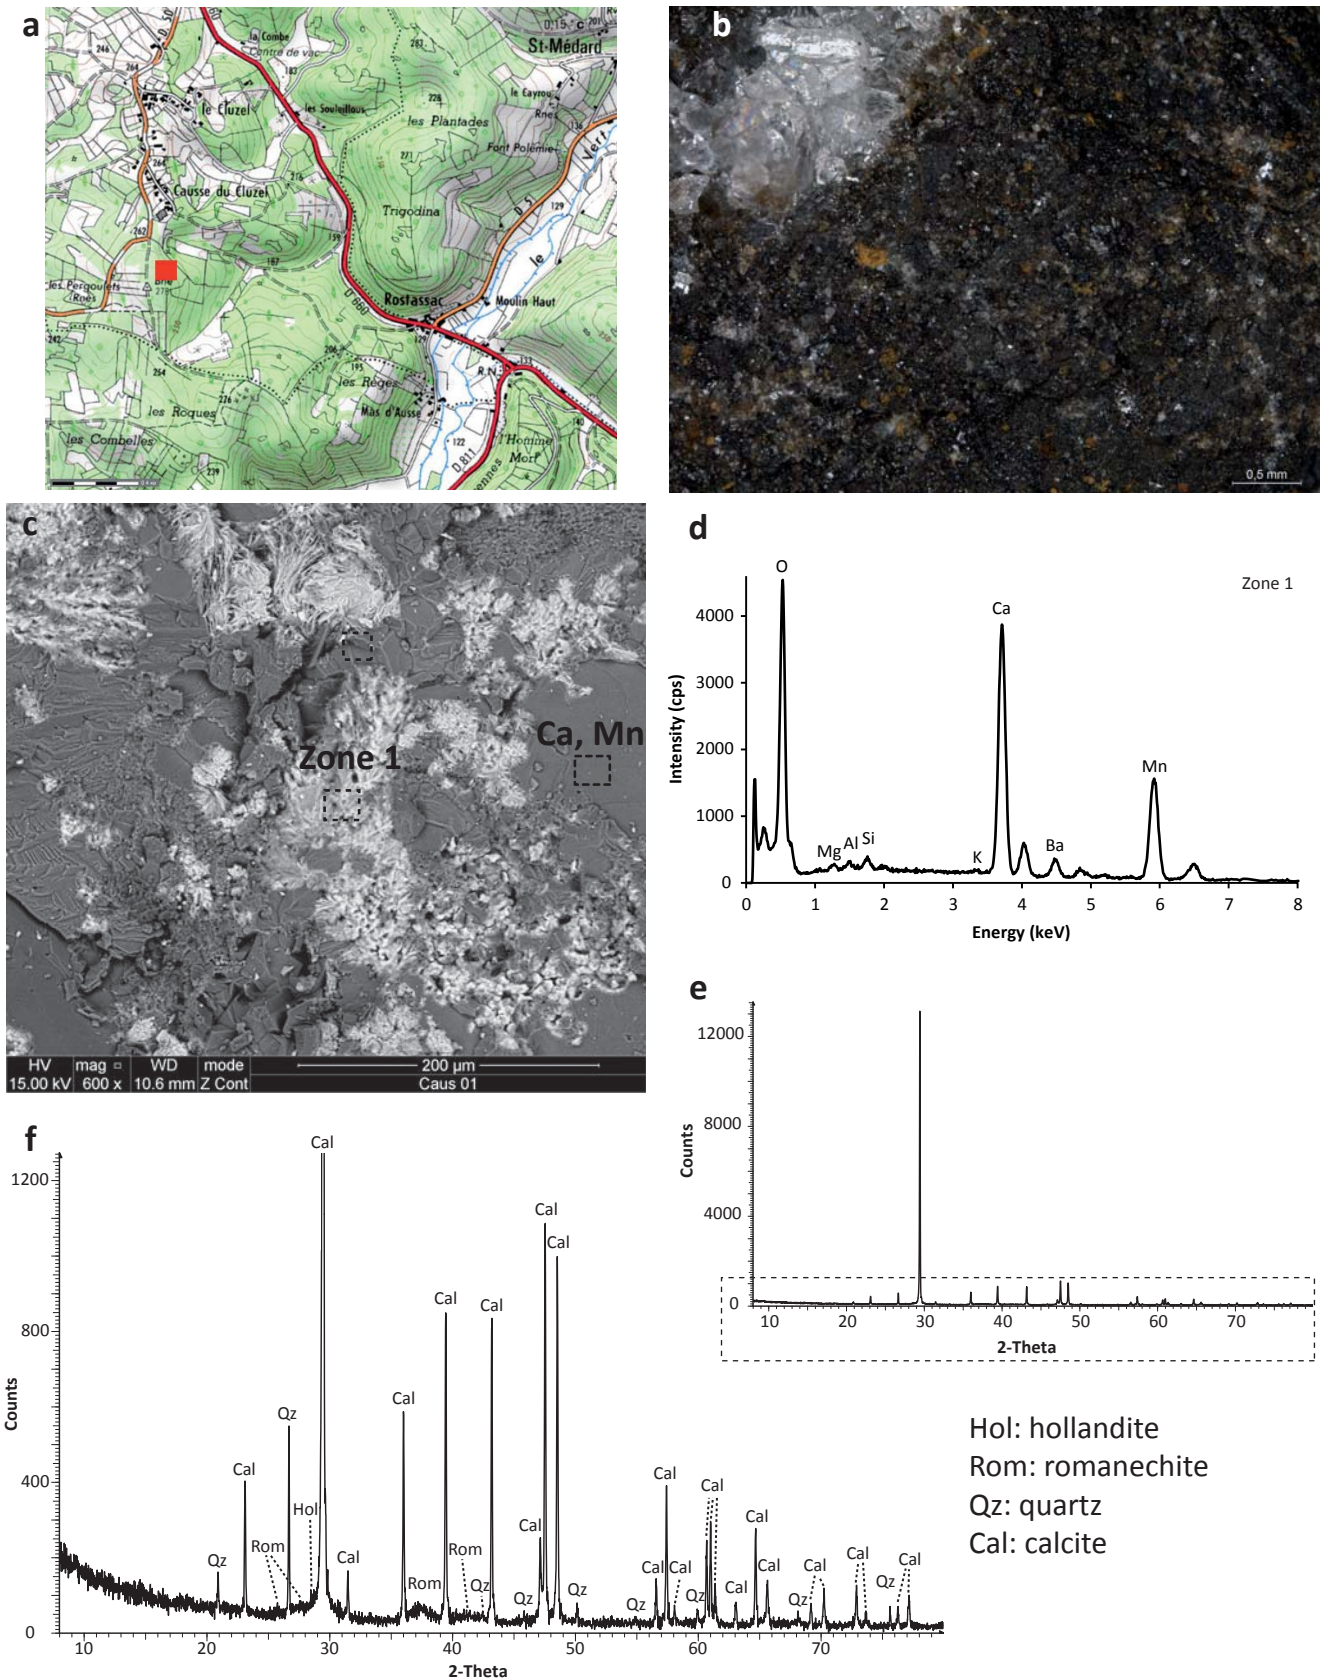

**Figure D. Results of analyses conducted on samples from *Mine de Causse du Cluzel*.** a: location of the outcrop (red square); b: macro photo of the surface of the sample CAU-01 ; c: SEM images in BSE mode of the sample (zones indicate analysed areas); d: EDS spectrum of zone 1 represented in c; e: X-ray diffractogram obtained from pulverized sample; f: zoom of the X-ray diffractogram represented in e.

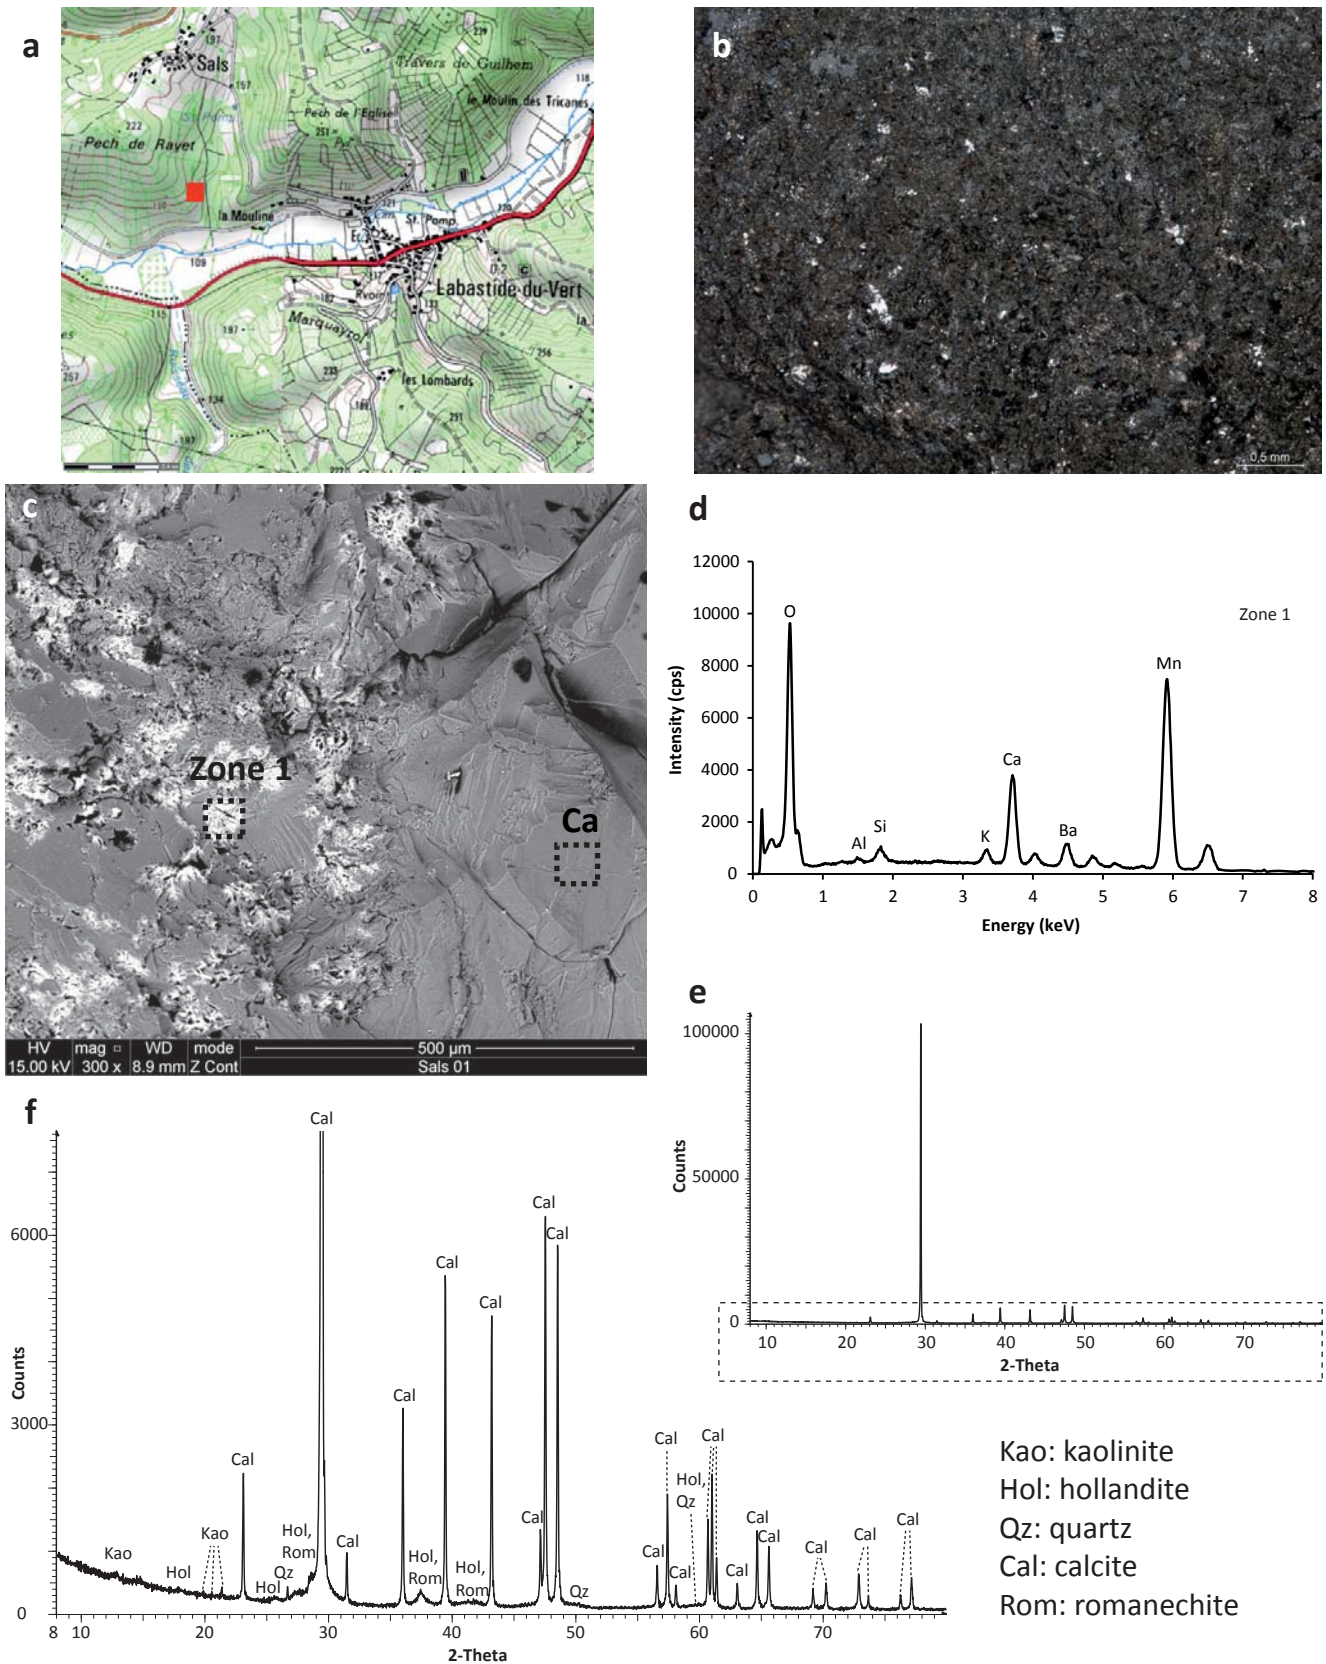

**Figure E. Results of analyses conducted on samples from *Mine de Sals*.** a: location of the outcrop (red square); b: macro photo of the surface of the sample SAL-01; c: SEM images in BSE mode of the sample (squares indicate analysed area); d: EDS spectrum of zone 1 represented in c; e: X-ray diffractogram obtained from pulverized sample; f: zoom of the X-ray diffractogram represented in e.

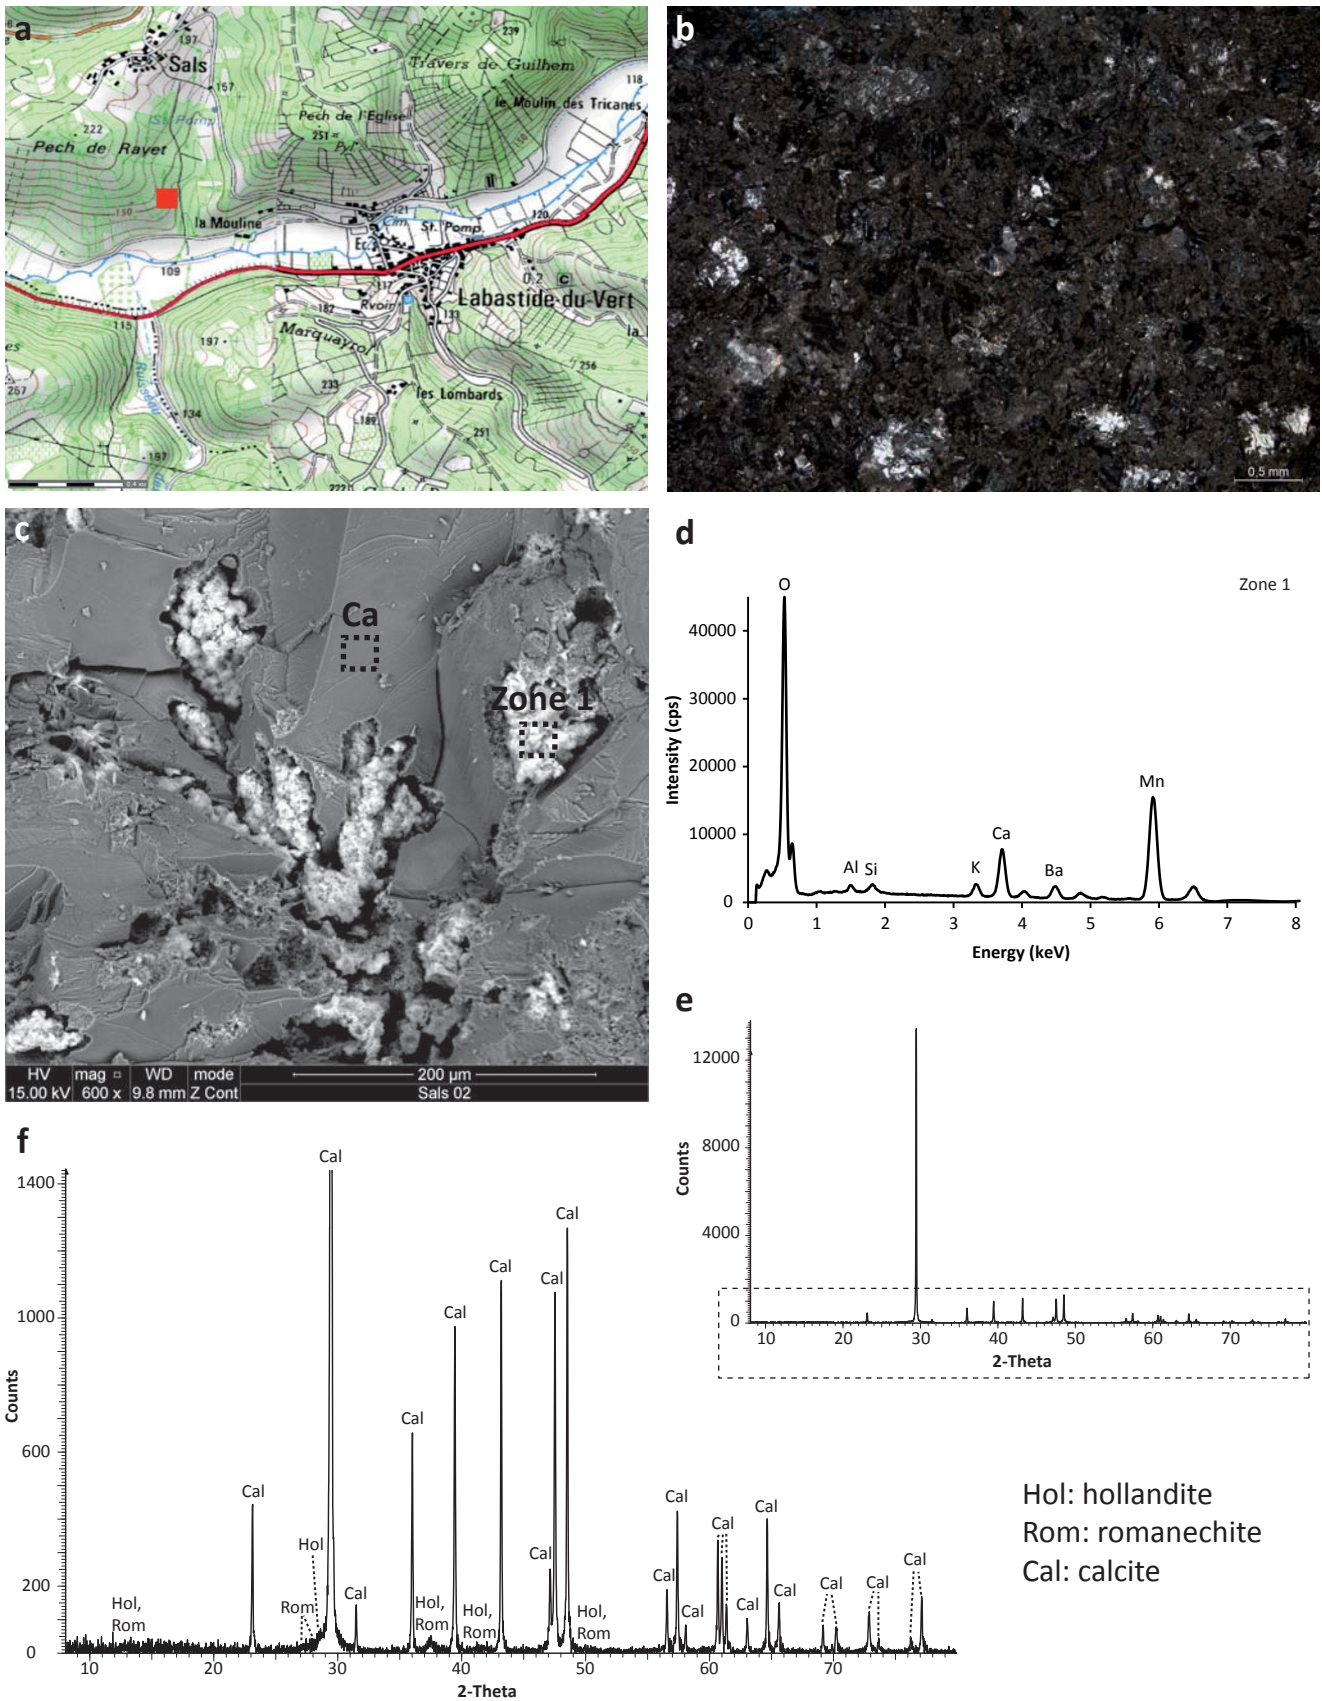

**Figure F. Results of analyses conducted on samples from *Mine de Sals*.** a: location of the outcrop (red square); b: macro photo of the surface of the sample SAL-02; c: SEM images in BSE mode of the sample (zones indicate analysed area); d: EDS spectrum of zone 1 represented in c; e: X-ray diffractogram obtained from pulverized sample; f: zoom of the x-ray diffractogram represented in e.

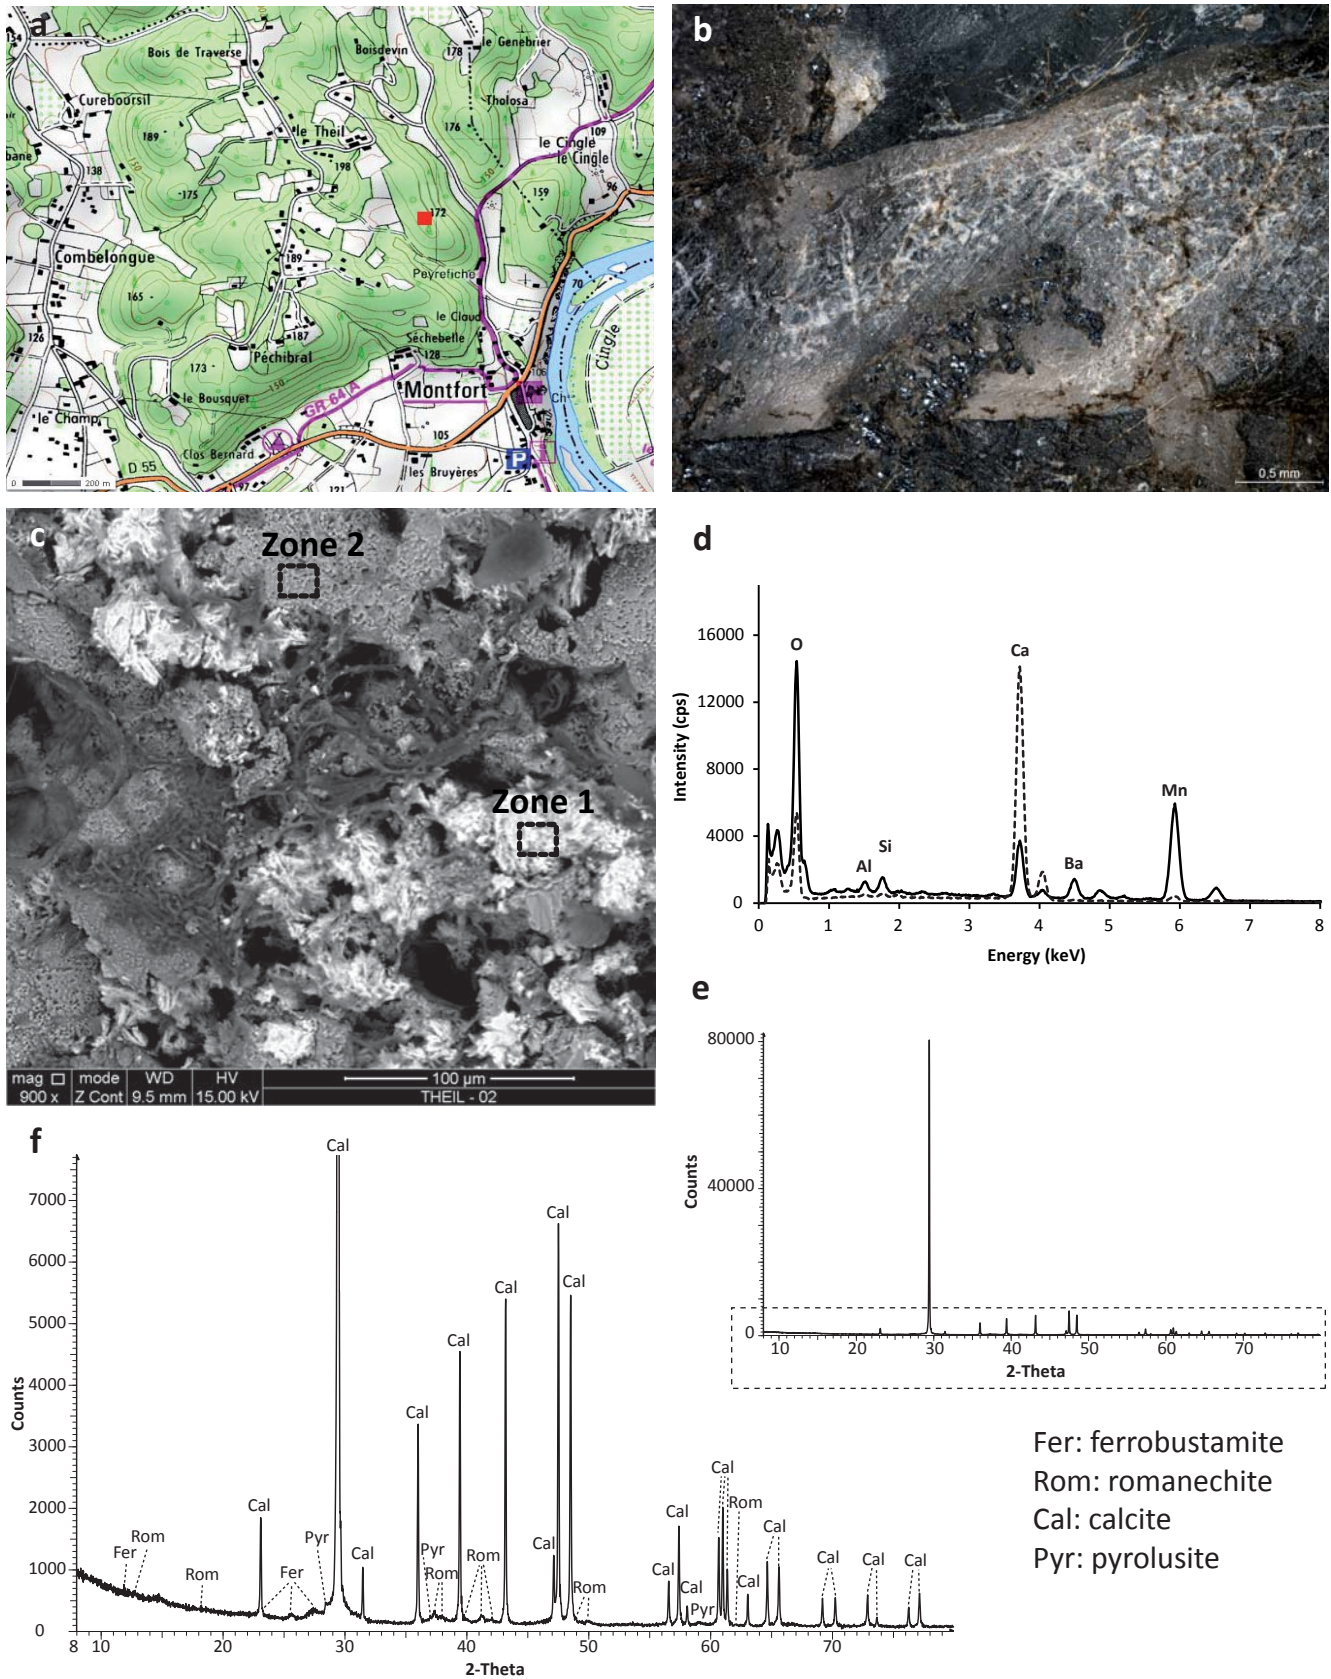

**Figure G. Results of analyses conducted on samples from *Mine de Le Theil*.** a: location of the outcrop (red square); b: macro photo of the surface of the sample THE-02; c: SEM image in BSE mode of the sample (squares indicate analysed areas); d: EDS spectrum of zones 1 and 2 (straight and dotted line, respectively) indicated in c; e: X-ray diffractogram obtained from pulverized sample; f: zoom of the X-ray diffractogram represented in e.



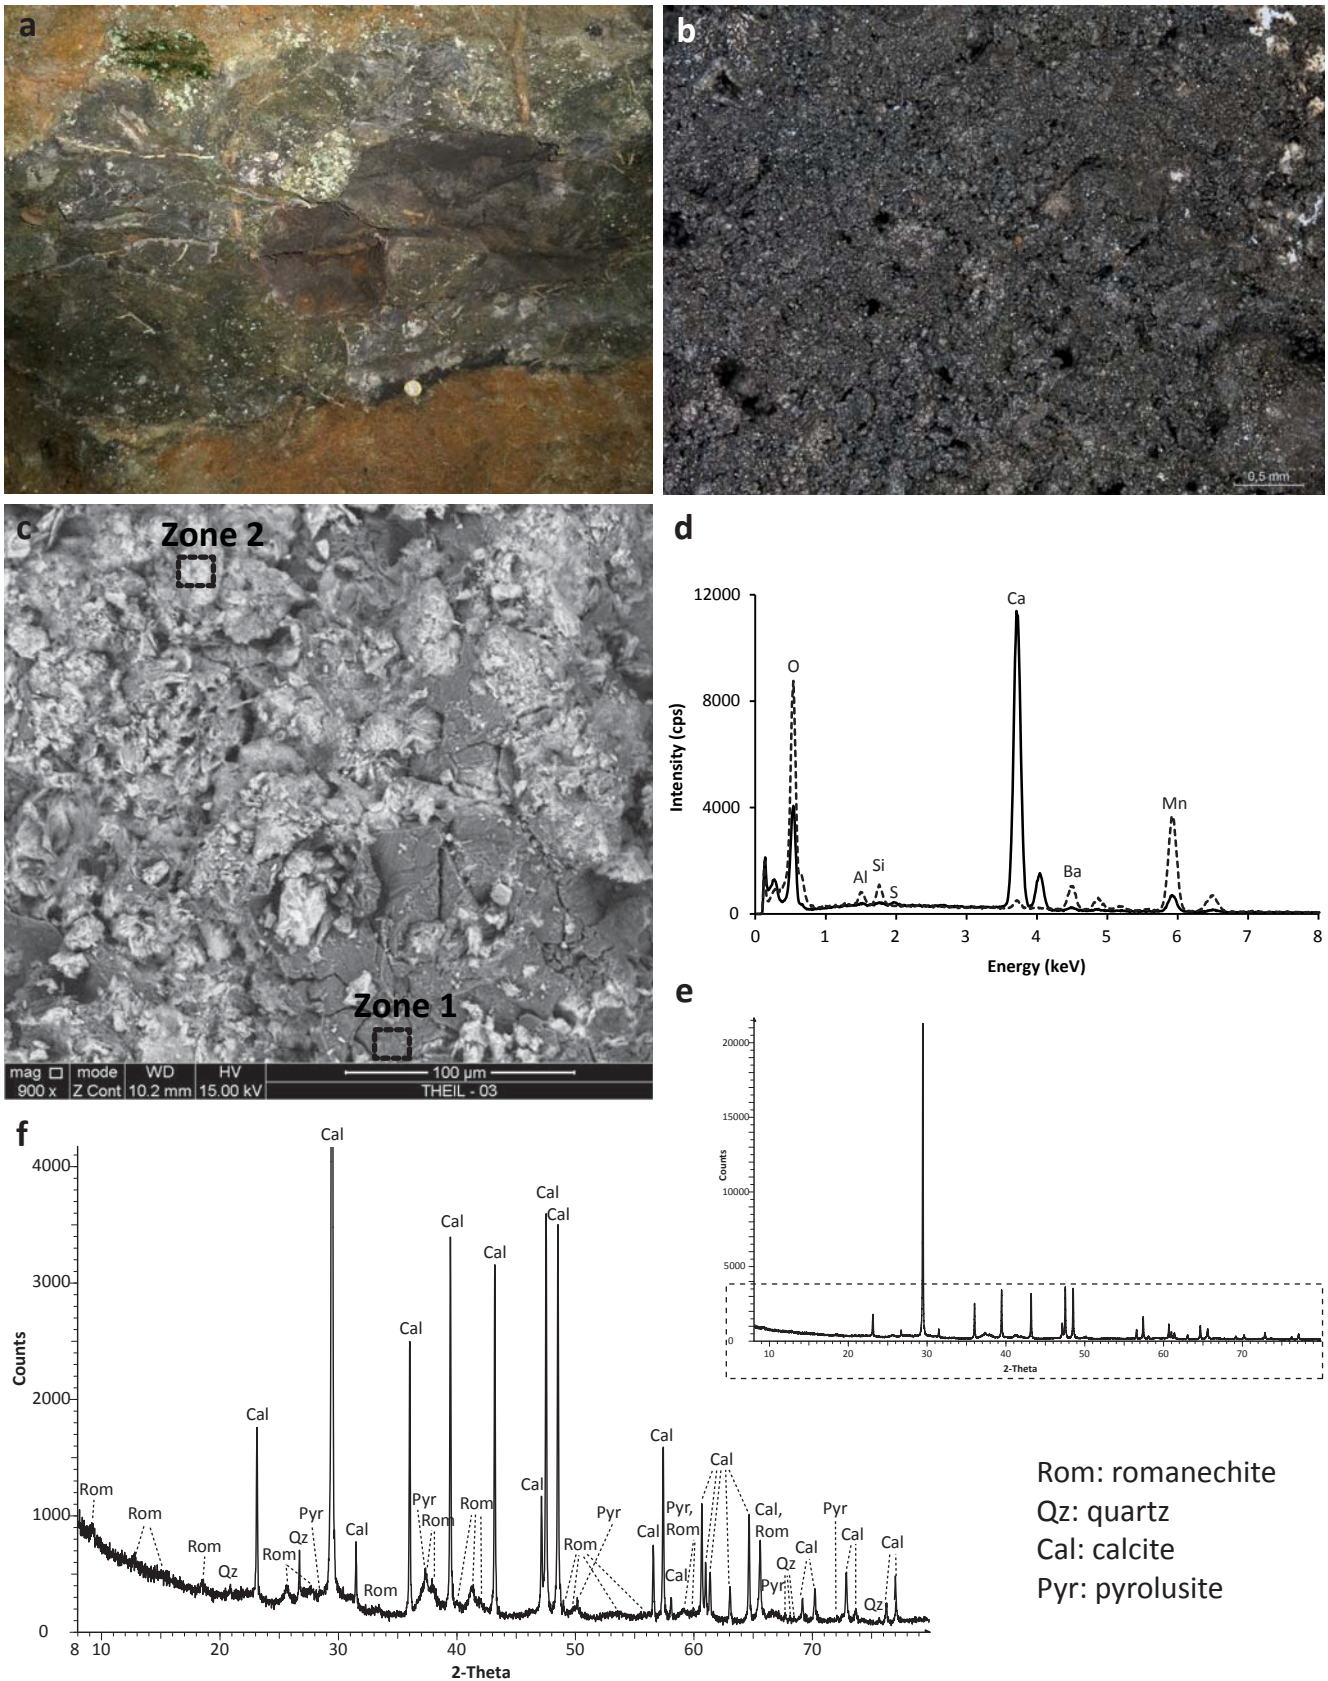

**Figure H. Results of analyses conducted on samples from *Mine de Le Theil*.** a: photo of the sampled area; b: macro photo of the surface of the sample THE-03; c: SEM image in BSE mode of the sample (squares indicate analysed areas); d: EDS spectrum of zones 1 and 2 (straight and dotted line, respectively) indicated in c; e: X-ray diffractogram obtained from pulverized sample; f: zoom of the X-ray diffractogram represented in e.

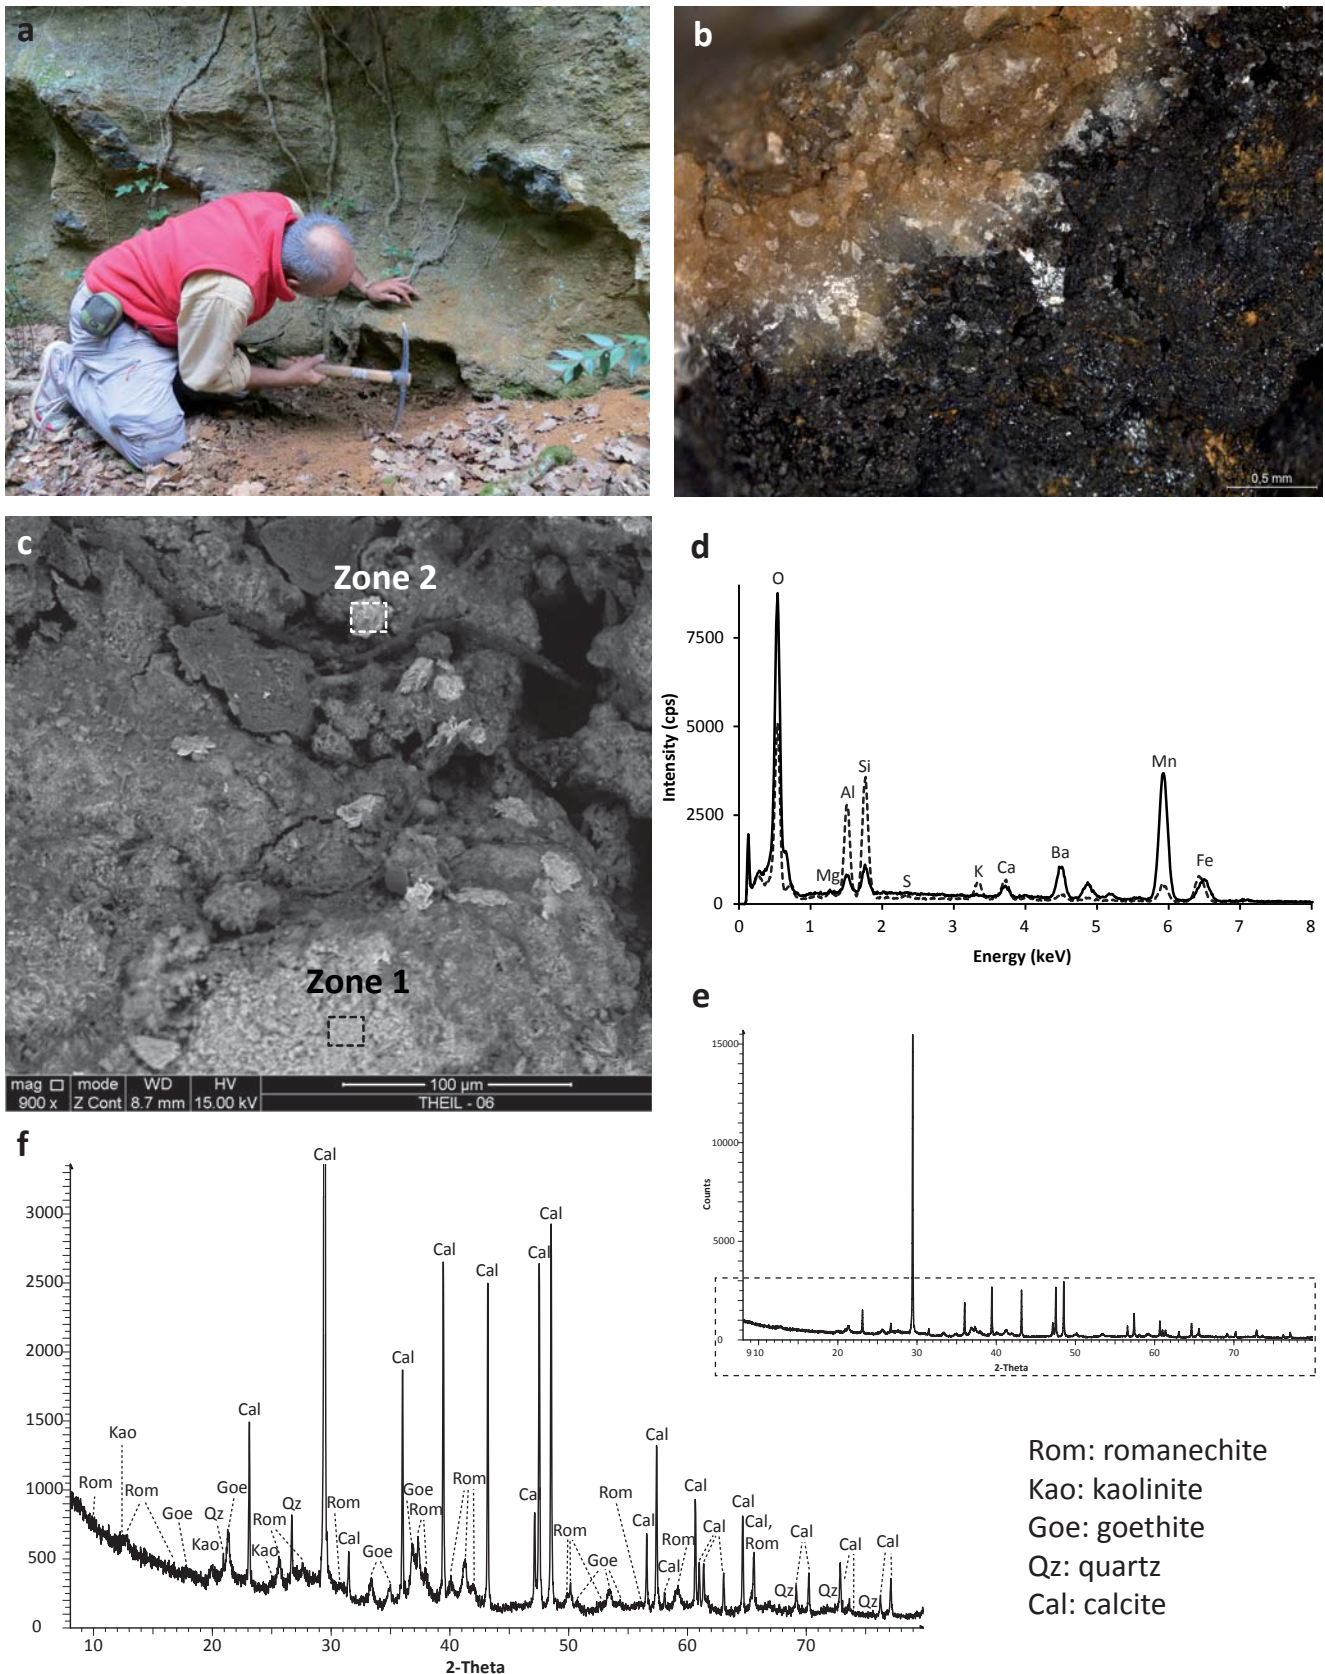

**Figure I. Results of analyses conducted on samples from *Mine de Le Theil*.** a: photo of the sampled area; b: macro photo of the surface of the sample THE-06; c: SEM image in BSE mode of the sample (squares indicate analysed areas); d: EDS spectrum of zones 1 and 2 (straight and dotted line, respectively) indicated in c; e: X-ray diffractogram obtained from pulverized sample; f: zoom of the X-ray diffractogram represented in e.

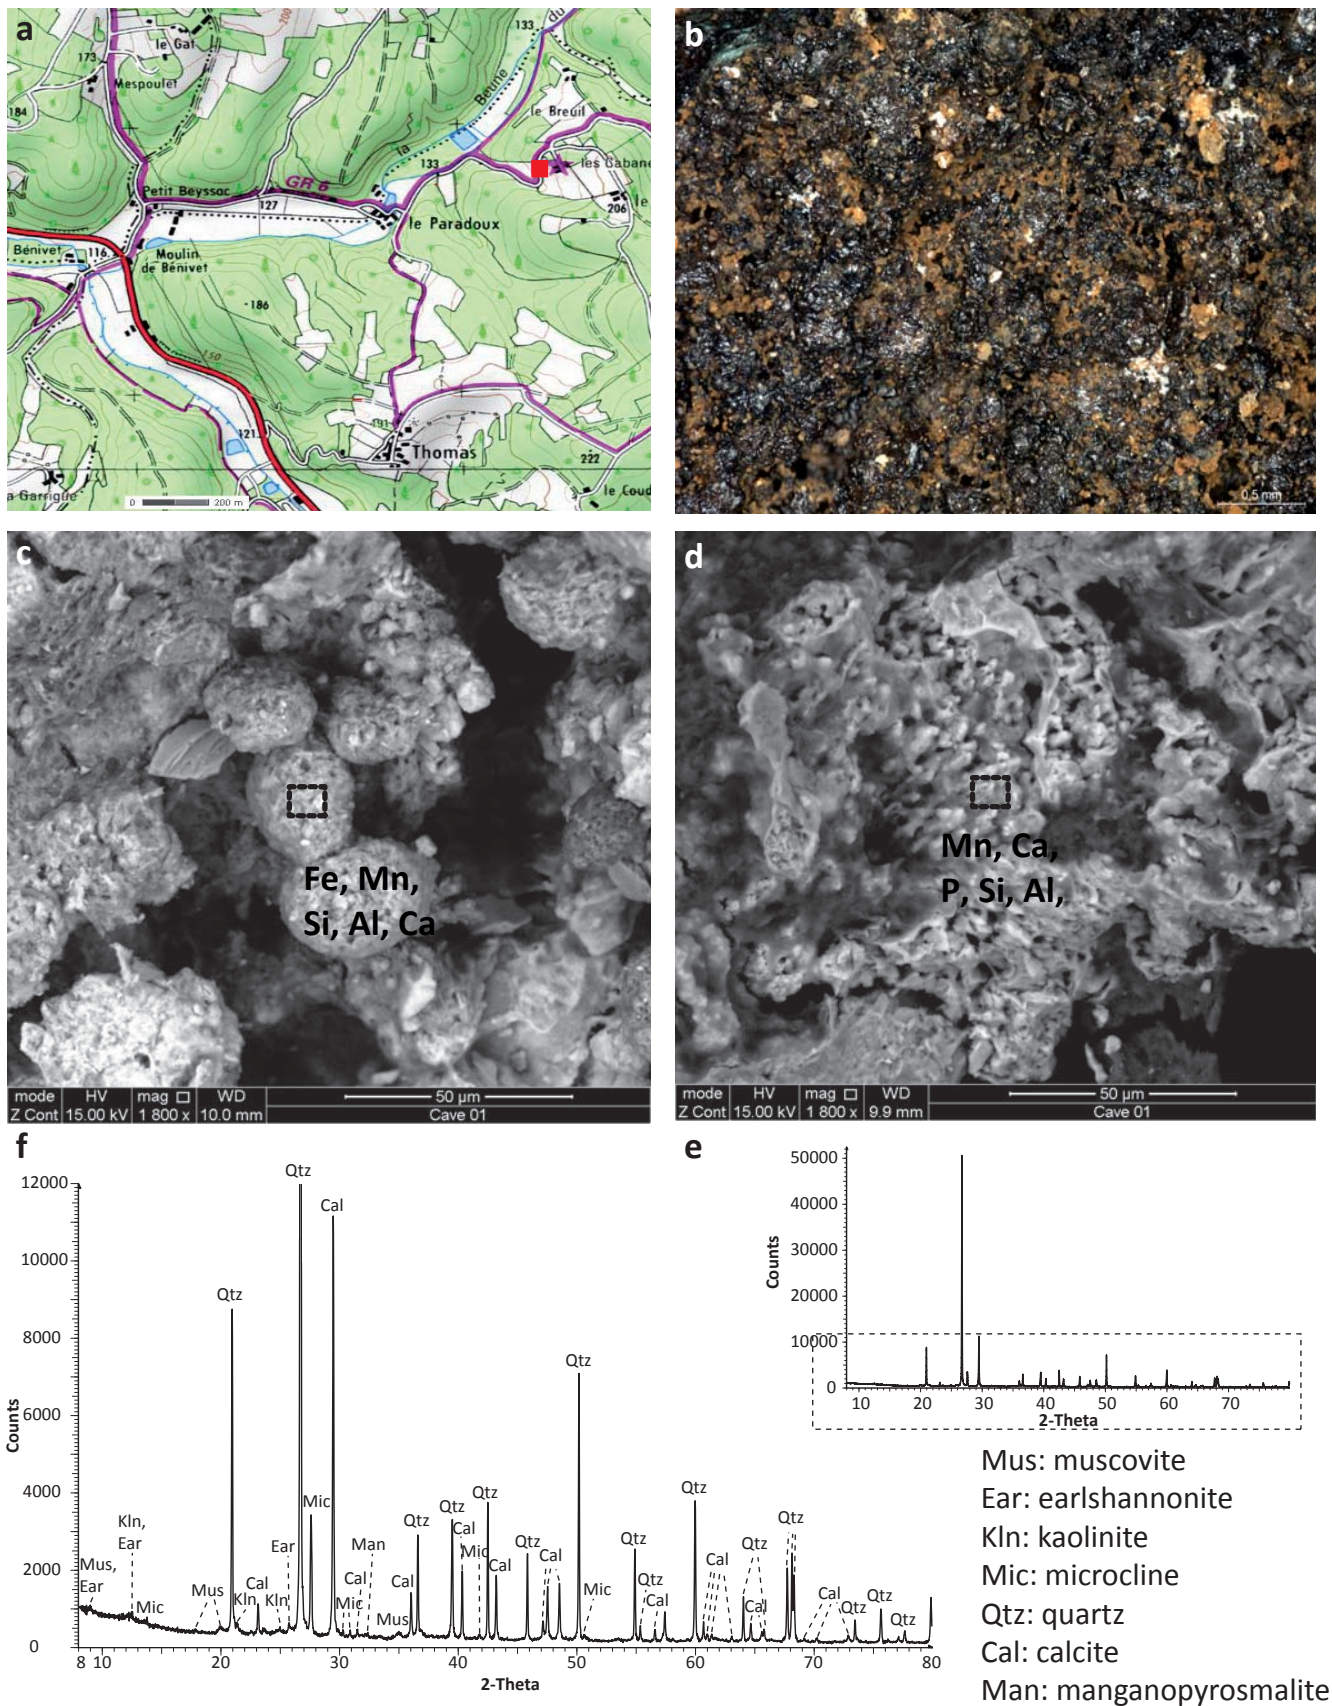

**Figure J. Results of analyses conducted on samples from *Grotte-Cave*.** a: location of the cave (red square); b: macro photo of the surface of the sample CAV-01; c, d: SEM images in BSE mode of the sample (squares indicate analysed areas); e: X-ray diffractogram obtained from pulverized sample; f: zoom of the X-ray diffractogram represented in e.

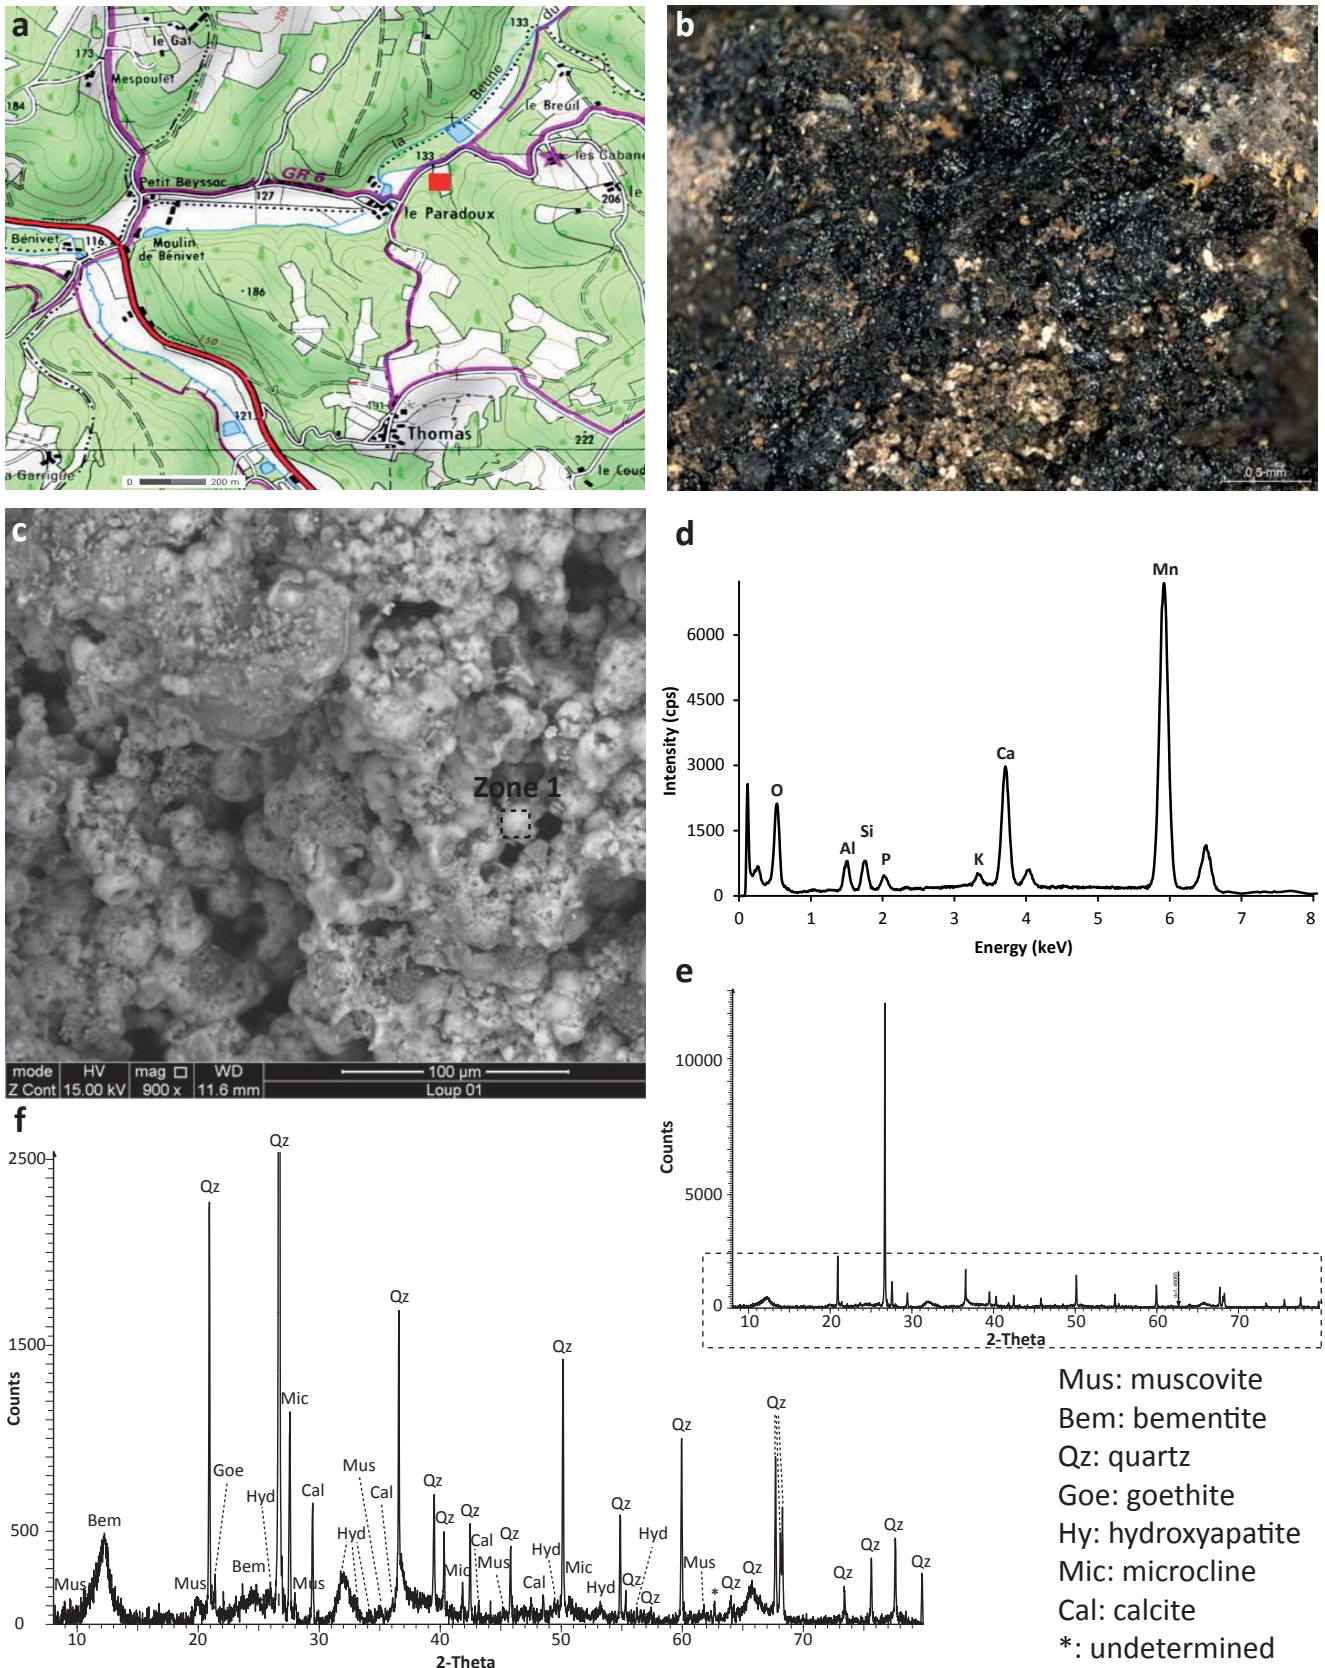

**Figure K. Results of analyses conducted in samples from *Grotte du Loup*.** a: location of the cave (red square); b: macro photo of the surface of the sample LOU-01; c: SEM images in BSE mode of the sample (square indicates analysed area); d: EDS spectrum of zone 1 represented in c; e: X-ray diffractogram obtained from pulverized sample; f: zoom of the X-ray diffractogram represented in e.

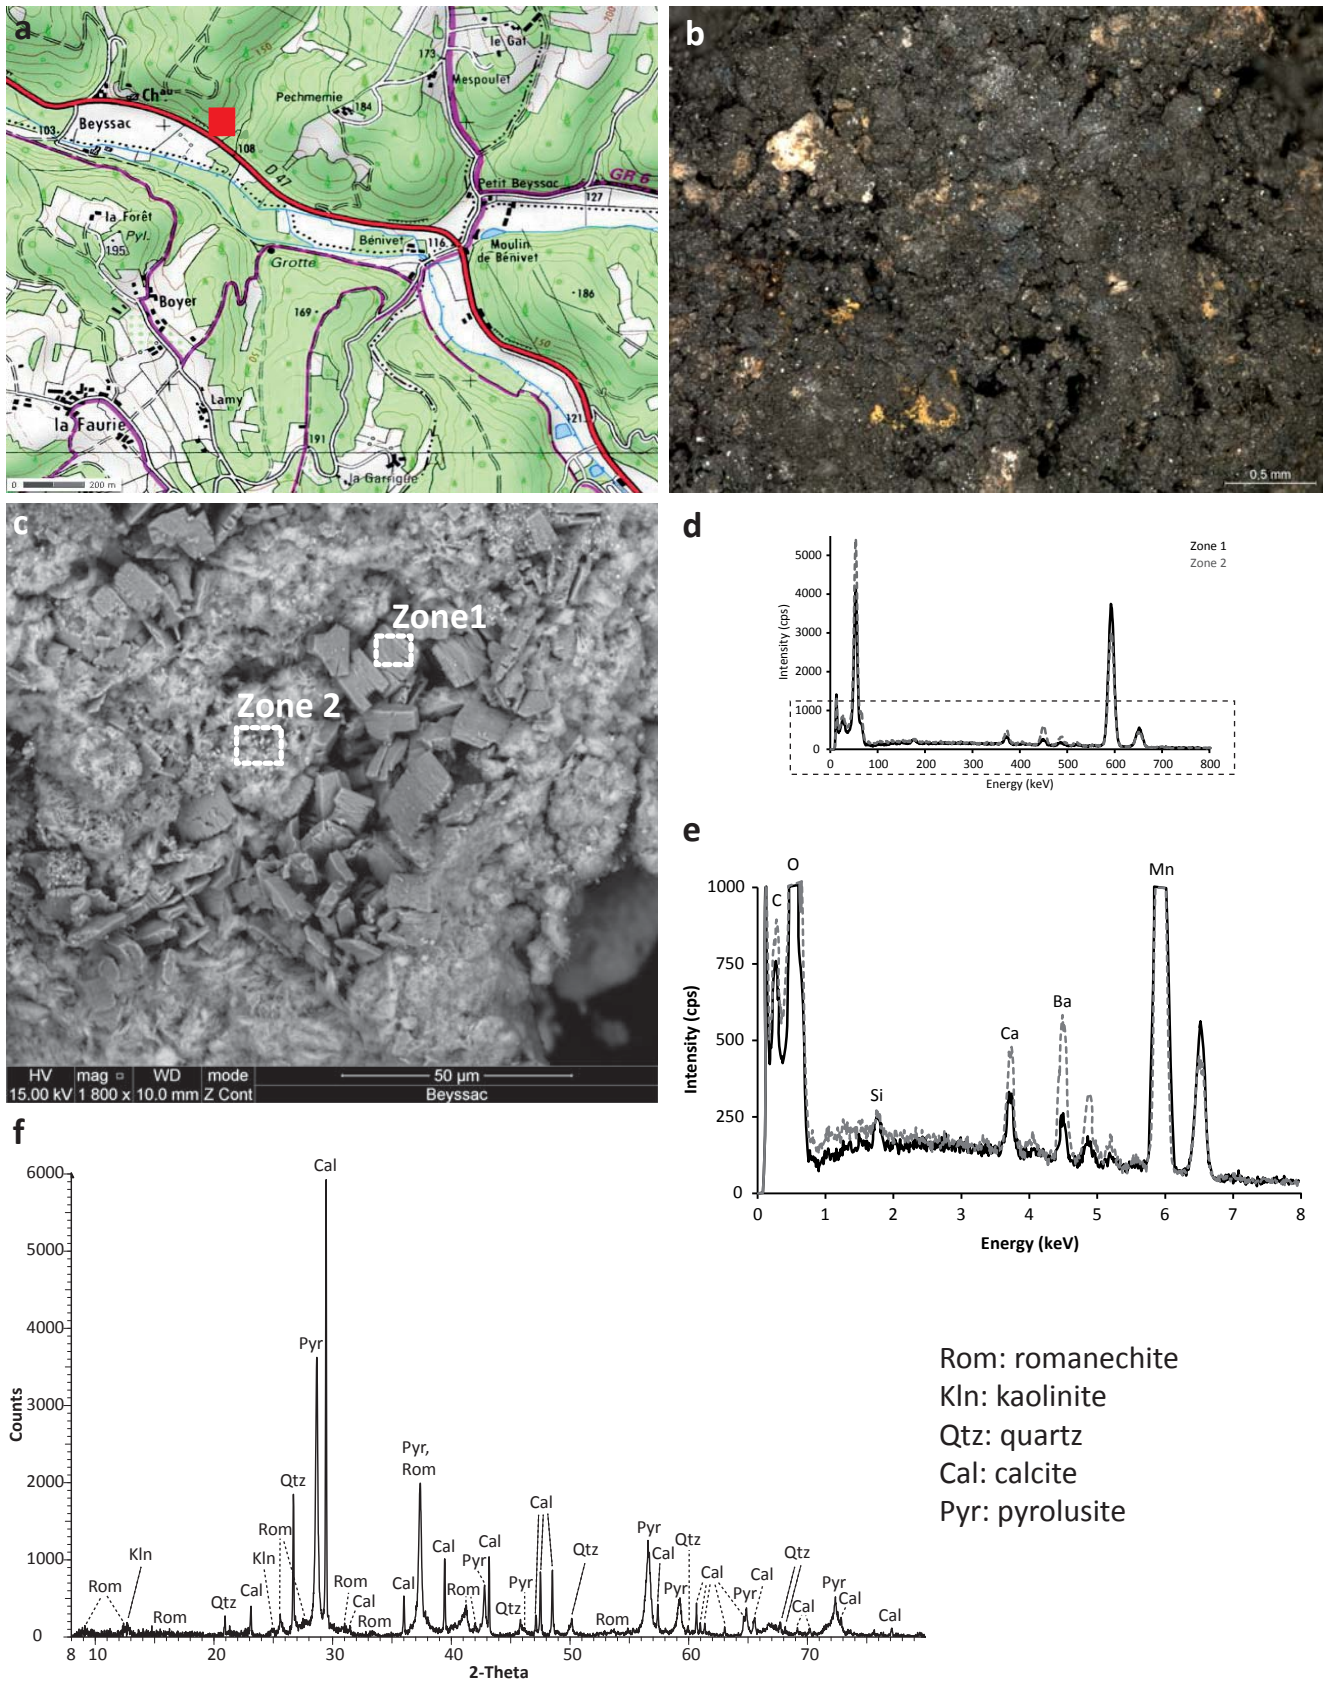

**Figure L. Results of analyses conducted in samples from *Grotte de Beysac*.** a: location of the cave (red square); b: macro photo of the surface of the sample BEY-01; c: SEM image in BSE mode of the sample (zones 1 and 2 indicate analysed areas); d, e: EDS spectra at different scales of zones 1 and 2 indicated in c (straight and dotted line, respectively); f: X-ray diffractogram obtained from pulverized sample.

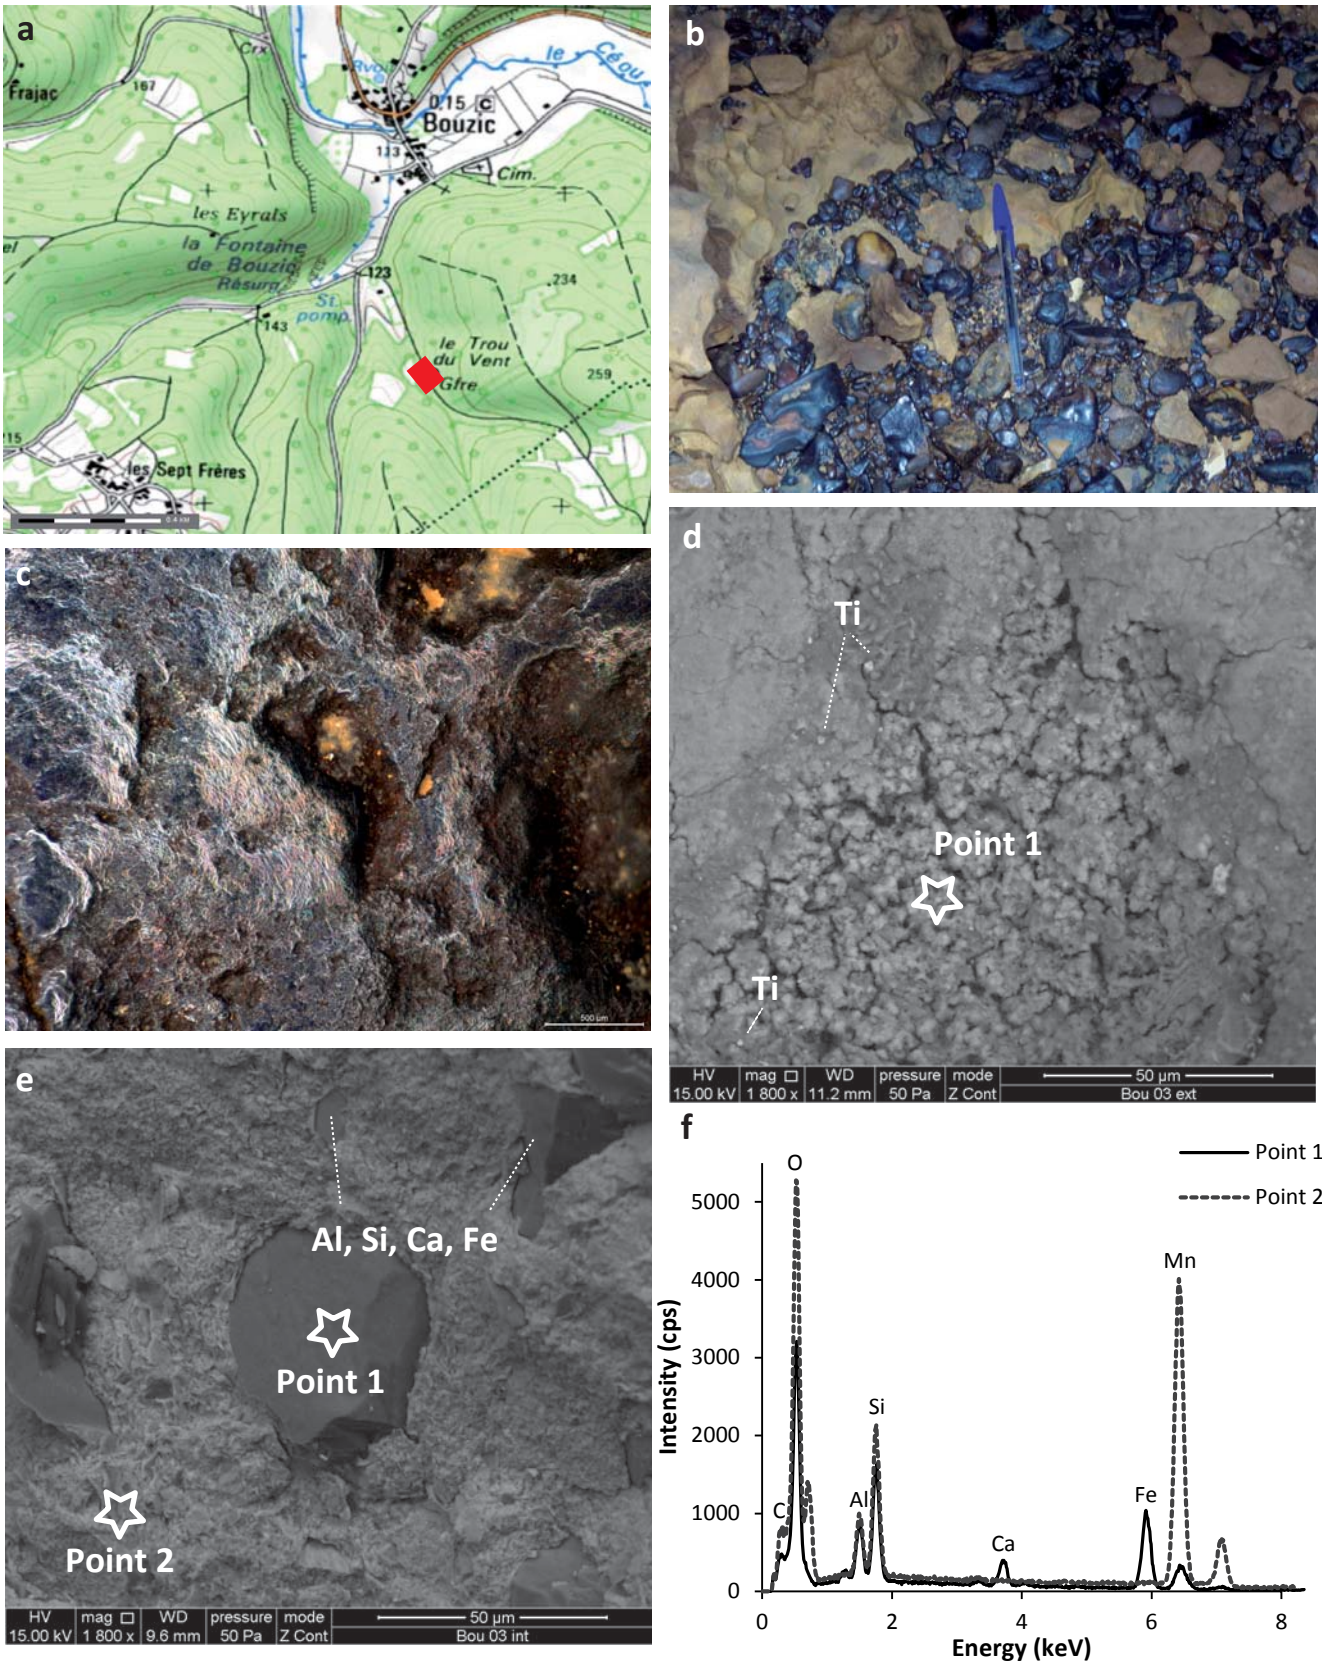

**Figure M. Results from analyses conducted on samples from *Grotte du Trou du Vent - Bouzic*.** a: location of the cave (in red); b: photo of the sampled area (@O. Huard); c: macro photo of the sample BOU-03 ; d, e: SEM images in BSE mode of the sample (d: external part; e: internal part). Stars indicate analysed spots; f: EDS spectra of spots 1 and 2 indicated in d and e.

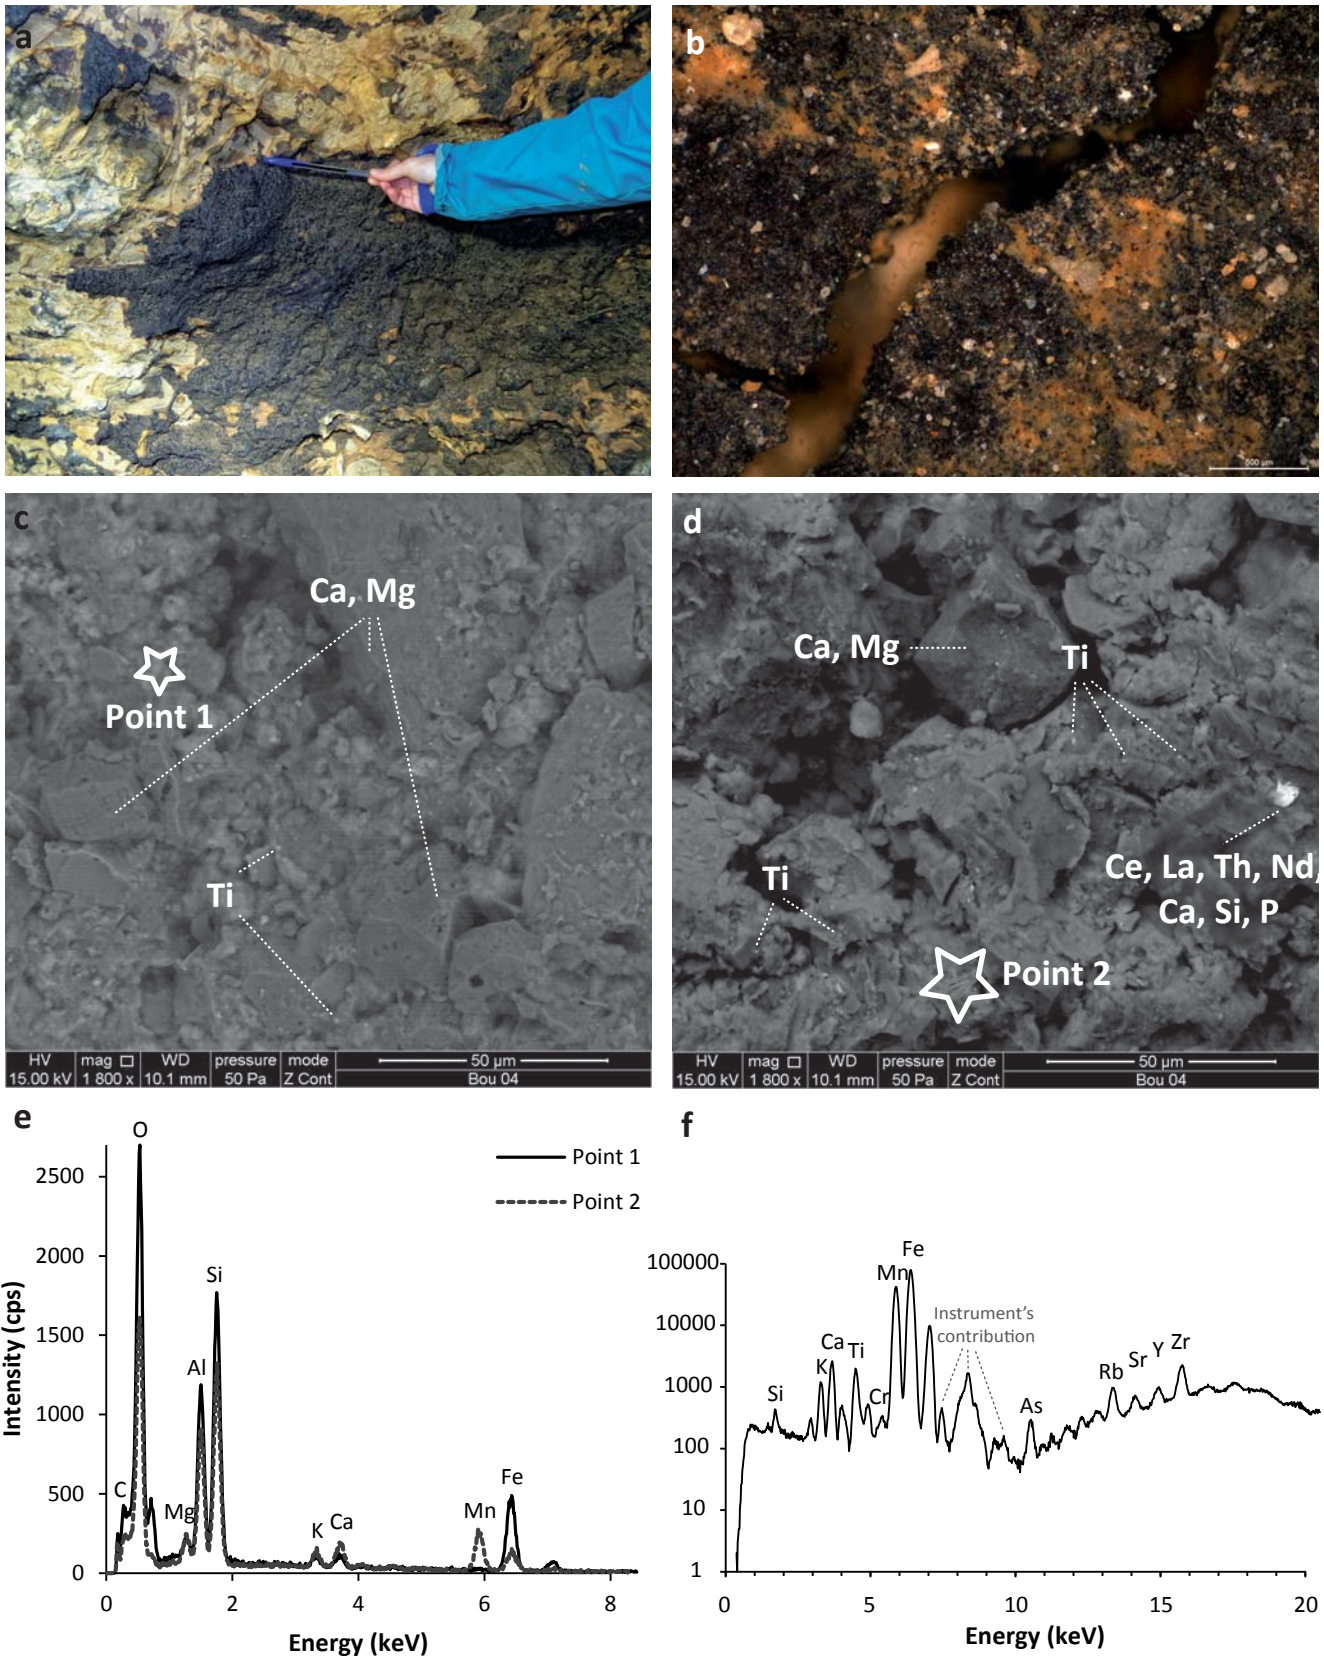

**Figure N. Results from analyses conducted on samples from *Grotte du Trou du Vent - Bouzic*.** a: photo of the sampled area (@O. Huard); b: macro photo of the sample BOU-04; c, d: SEM images in BSE mode of the sample. Stars indicate analysed spots; e: EDS spectra of spots 1 and 2 indicated in c and d; f: EDXRF spectrum from pulverized sample.

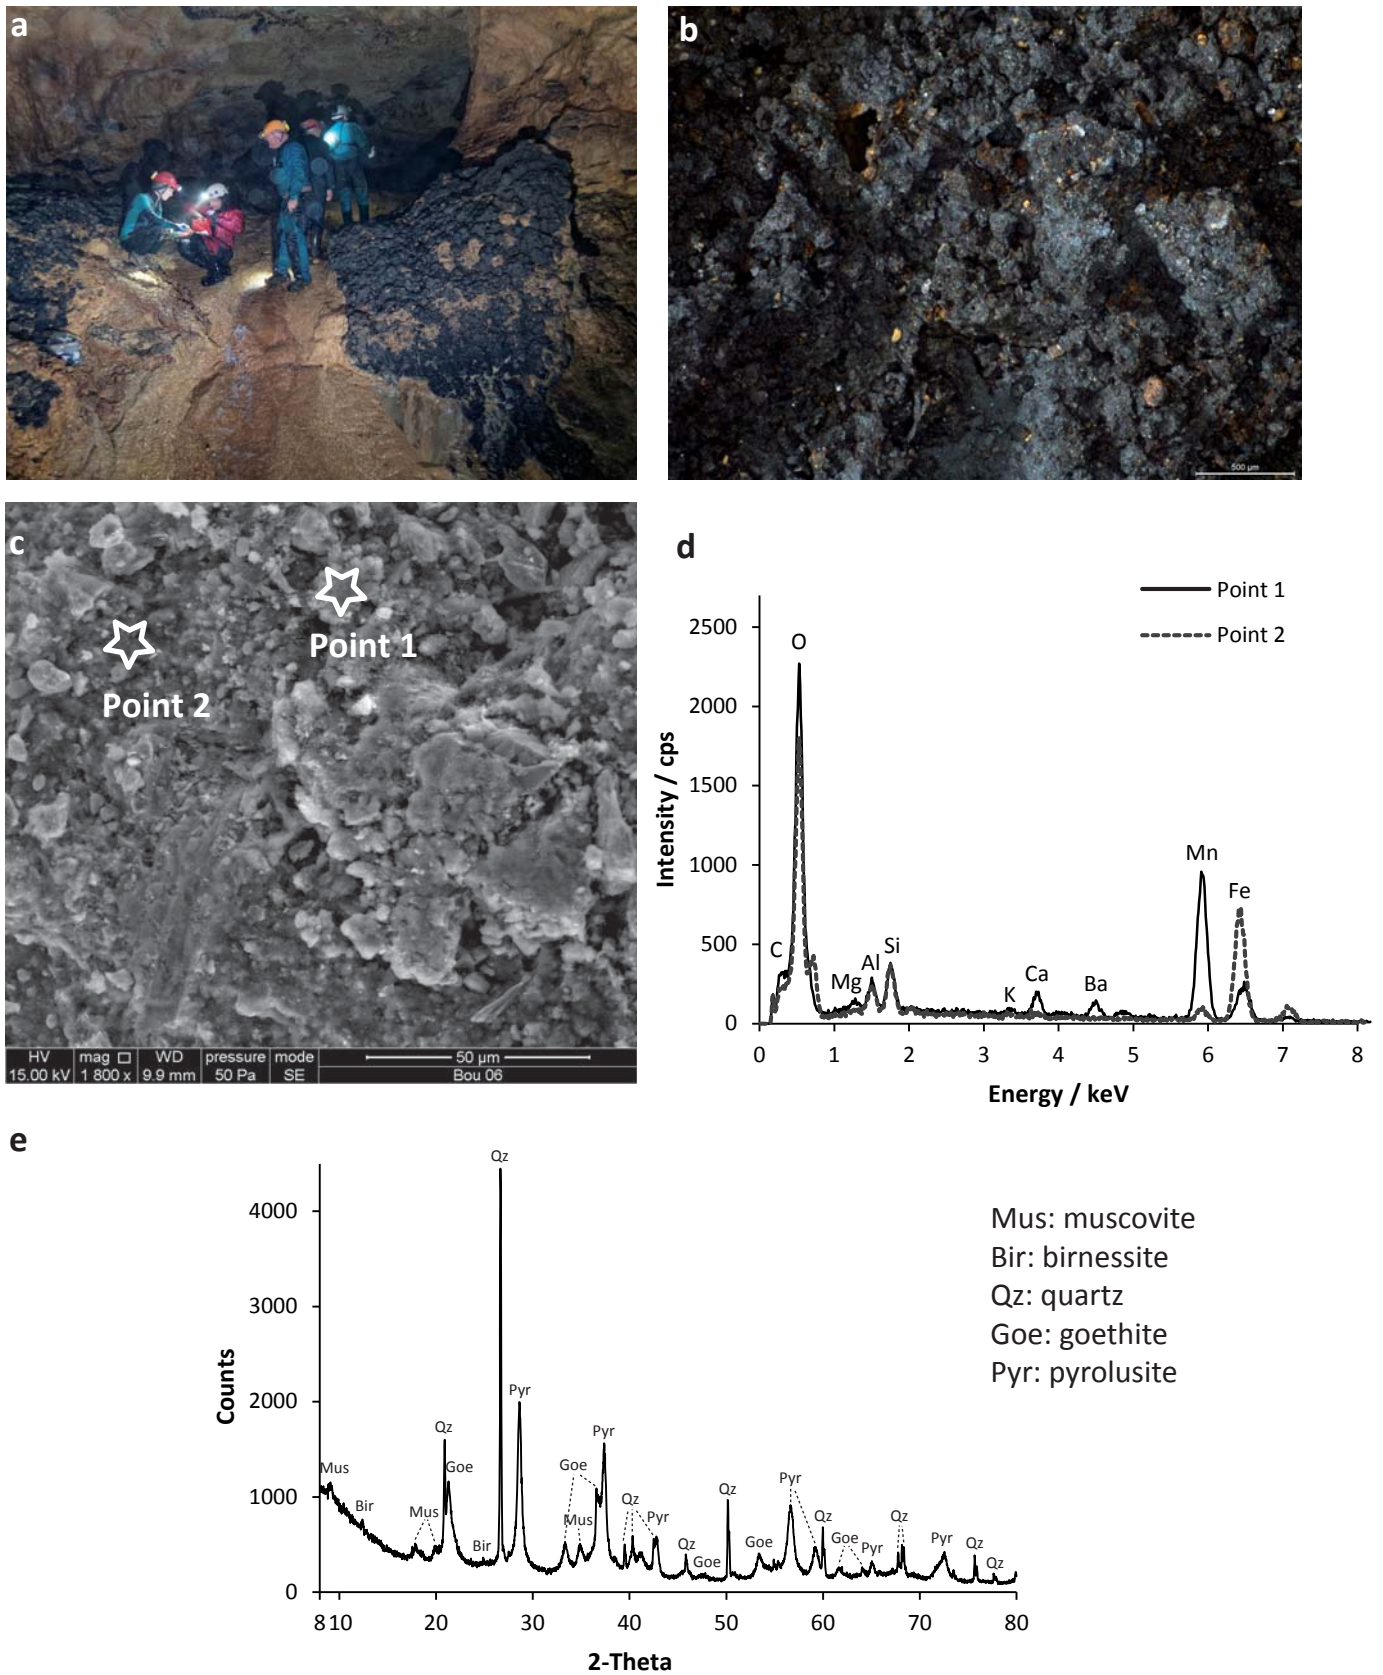

**Figure O.** Results from analyses conducted on samples from *Grotte du Trou du Vent - Bouzic*. a: photo of the sampled area (@O. Huard); b: macro photo of the sample BOU-06; c: SEM image in SE mode of the sample. Stars indicate analysed spots; e: EDS spectra of spots 1 and 2 indicated in c; e: XRD spectrum from pulverized sample.



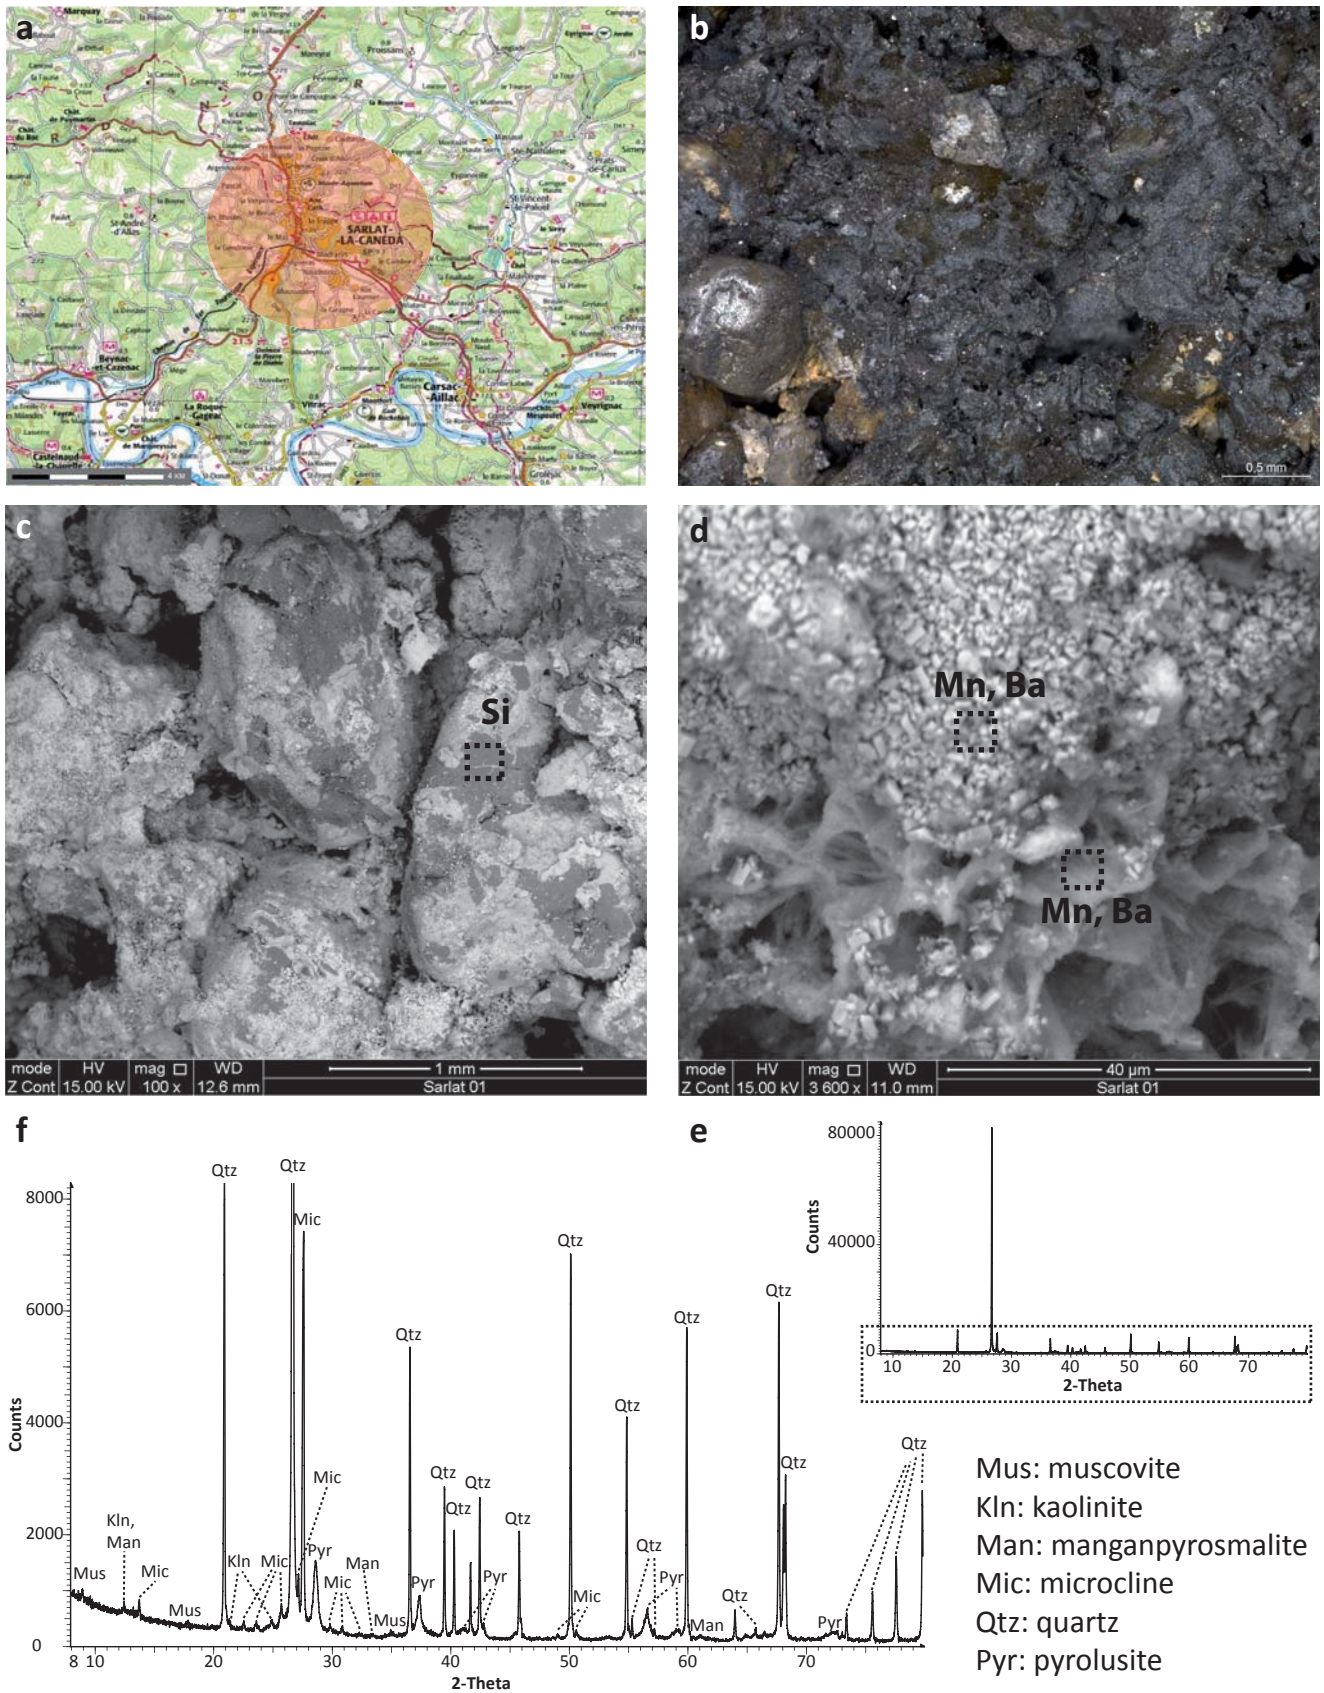

**Figure P. Results from analyses conducted on samples from Sarlat.** a: approximate location of the outcrop; b: macro photo of the surface of the sample SAR-01; c, d: SEM images in BSE mode of the sample (zones indicate analysed area); e, f: X-ray diffractogram obtained from pulverized sample.

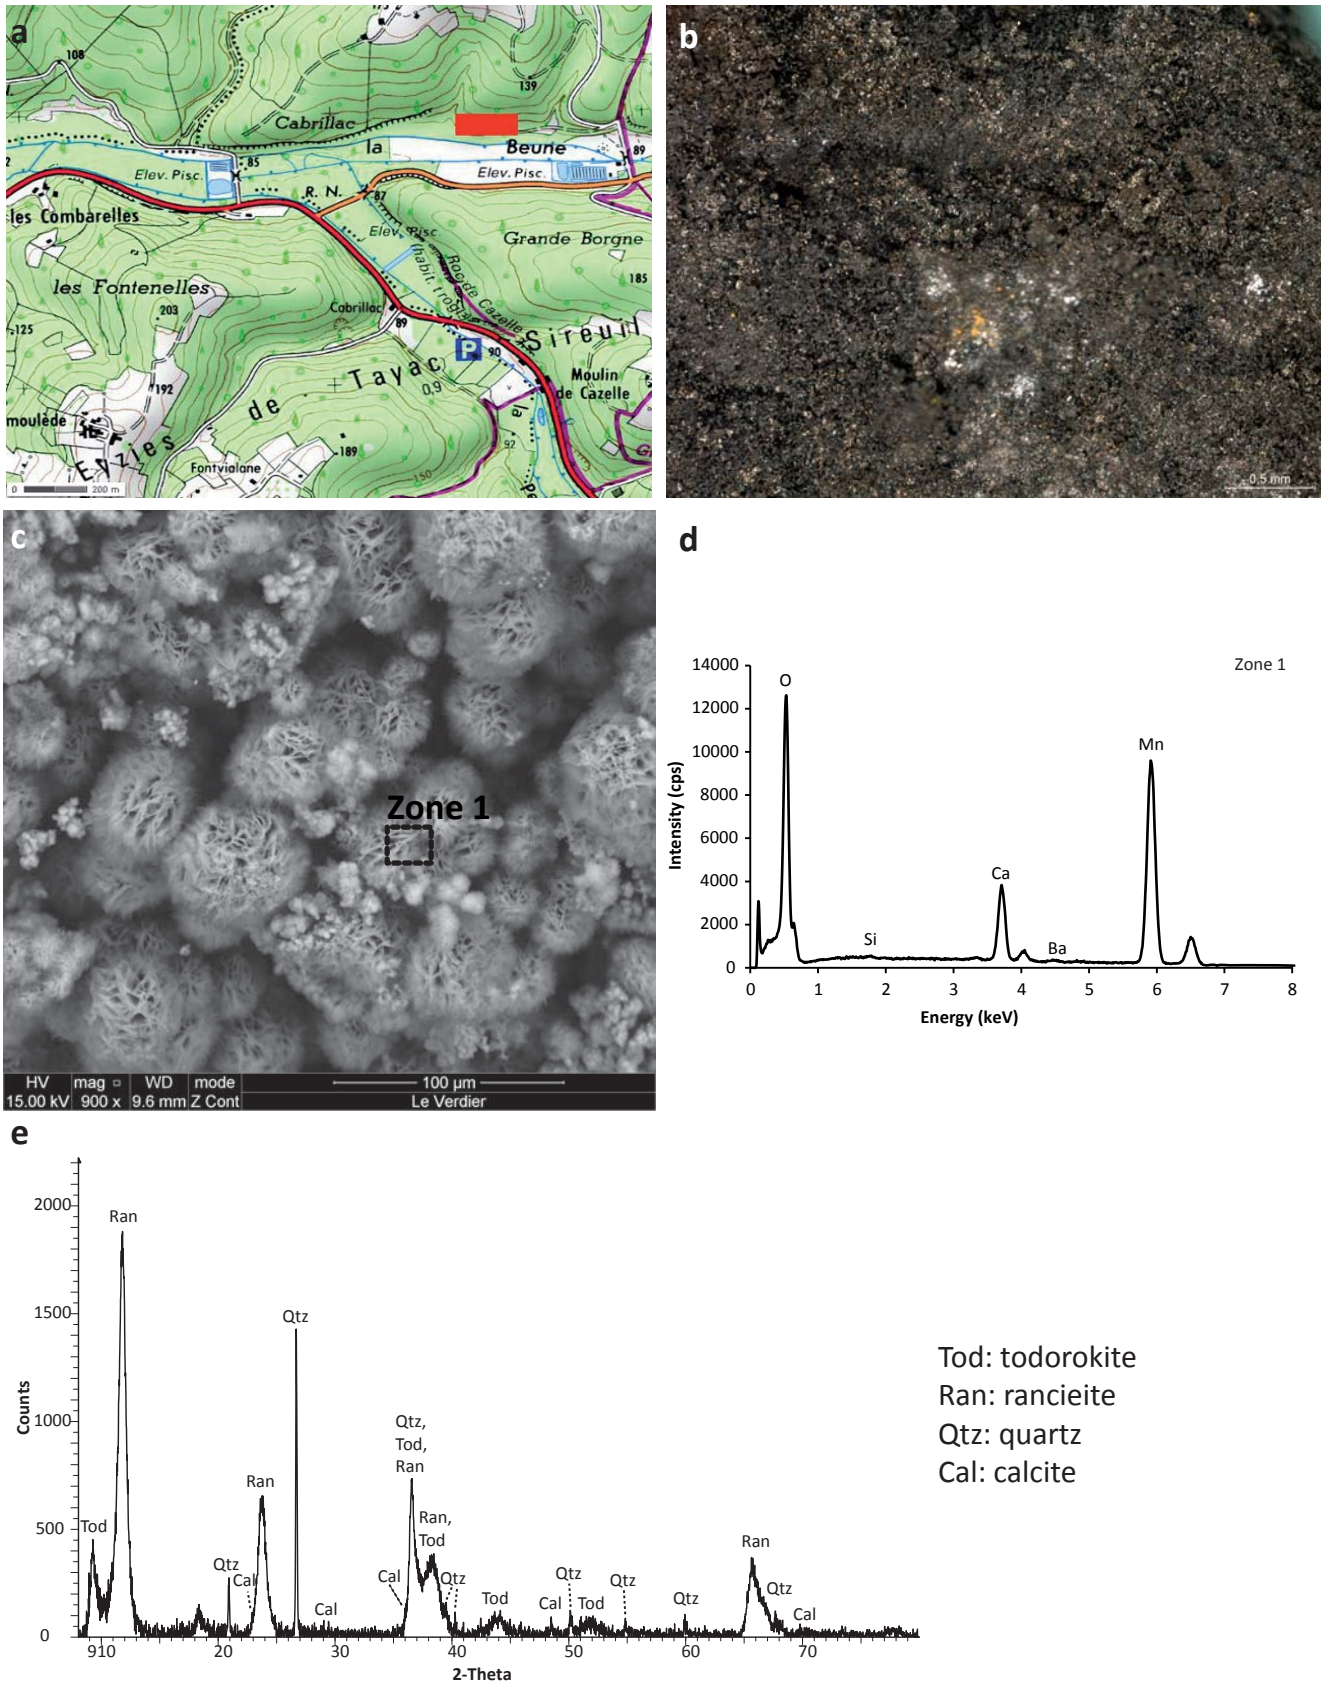

**Figure Q.** Results of analyses conducted on samples from *Carrière Le Verdier*. a: location of the outcrop (red square); b: macro photo of the surface of the sample VER-01; c: SEM image in BSE mode of the sample (zone 1 indicate analysed area); d: EDS spectrum of zone 1 indicated in c; e: X-ray diffractogram obtained from pulverized sample.

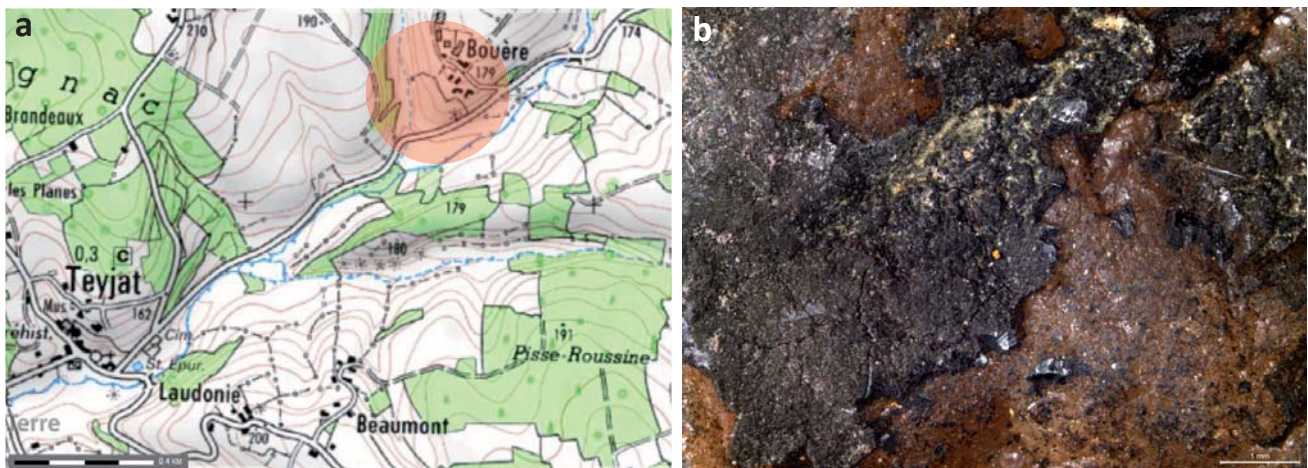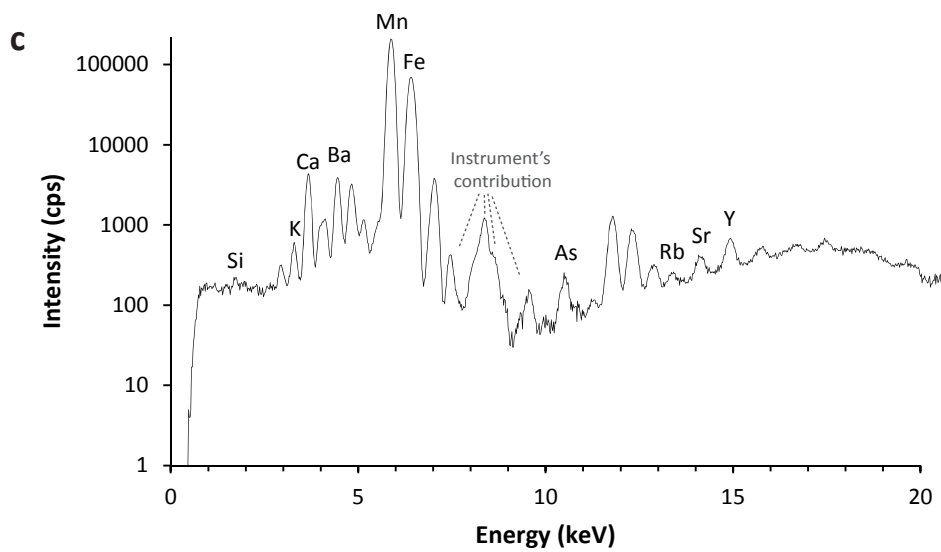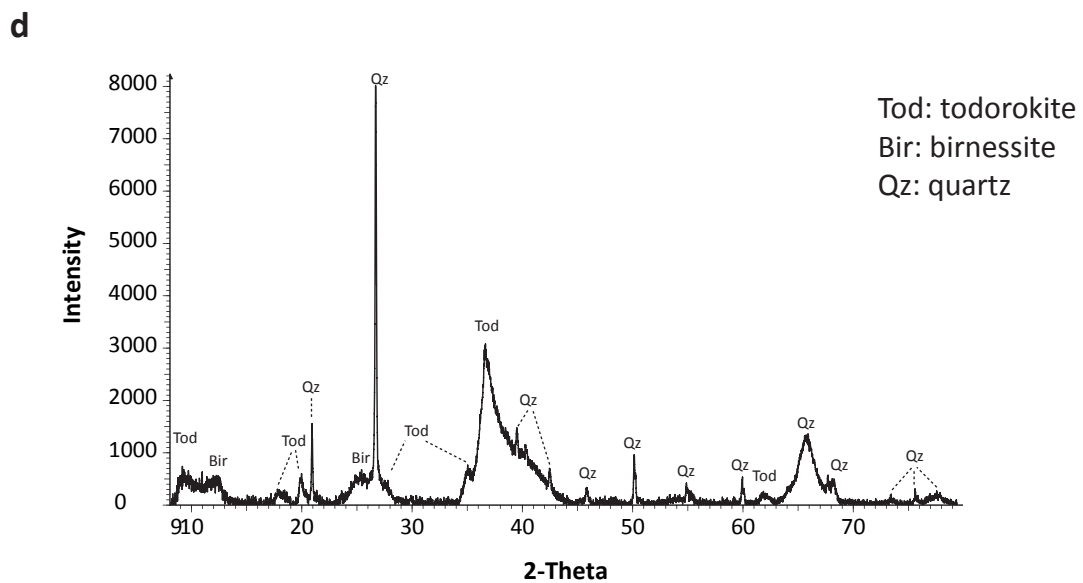

**Figure R. Results of analyses conducted on the sample from *Teyjat*.** a: location of the outcrop (in red); b: macro photo of the sample; c, d: EDXRF and XRD spectra from pulverized sample.

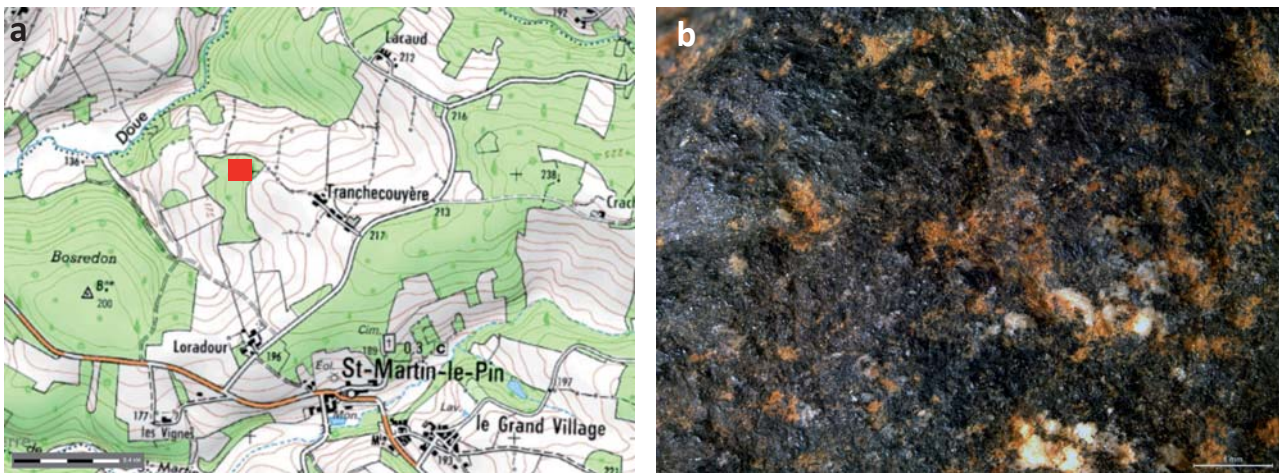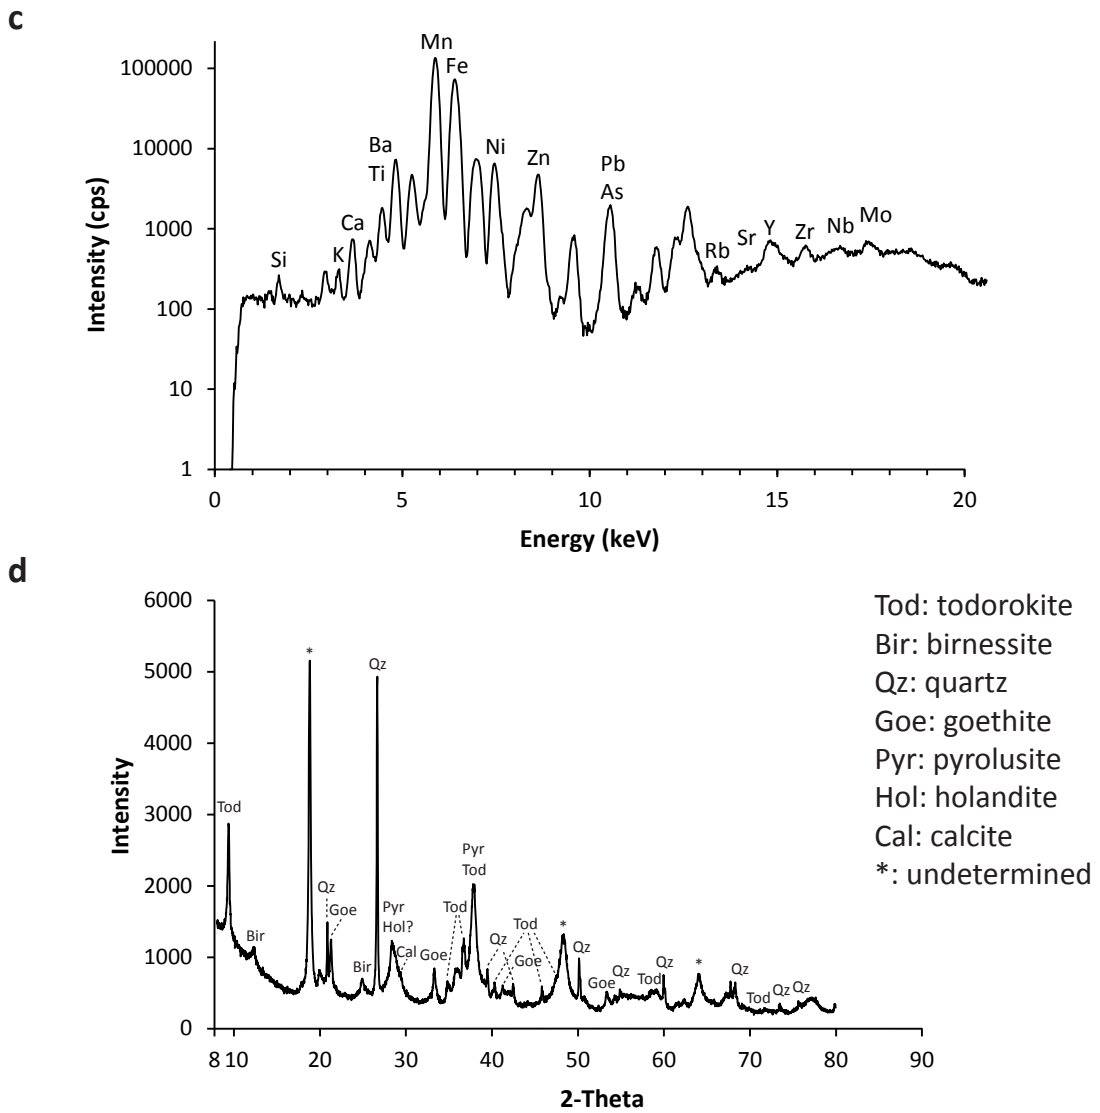

**Figure S. Results of analyses conducted on the sample from *Tranchecouyère*.** a: location of the outcrop (in red); b: macro photo of the sample; c, d: EDXRF and XRD spectra from pulverized sample.
